# Supplementary material for: The eBioKit, a stand-alone educational platform for bioinformatics
Source: PLoS Comput Biol. 2017 Sep 14;13(9):e1005616. doi: 10.1371/journal.pcbi.1005616 (PMC5598936; doi:10.1371/journal.pcbi.1005616)
Supplement: S1 Table — Source: The World Bank databank and others [13, 16, 17]. (XLSX) [file pcbi.1005616.s001.xlsx]

## Sheet: S1, Raw data
	Country Name	Country Code	Series Name	Series Code	Version Name	Version Code	2010 [YR2010]	2011 [YR2011]	2012 [YR2012]	2013 [YR2013]	2014 [YR2014]	2015 [YR2015]
1	Andorra	ADO	Technicians in R&D (per million people)	SP.POP.TECH.RD.P6	2016-07-01	201607	..	..	..	..	..	..
2	Andorra	ADO	Technicians in research and development (per million people)	SP.POP.TECH.RD	2016-07-01	201607	..	..	..	..	..	..
3	Andorra	ADO	Fixed broadband Internet subscribers (per 100 people)	IT.NET.BBND.P2	2016-07-01	201607	31.4503	33.0868	34.3351	35.0097	35.8939	..
4	Andorra	ADO	International Internet bandwidth (bits per second per Internet user)	IT.NET.BNDW.PC	2016-07-01	201607	..	..	..	..	..	..
5	Andorra	ADO	International Internet bandwidth (Mbps)	IT.NET.BNDW	2016-07-01	201607	..	..	..	..	..	..
6	Andorra	ADO	Internet hosts (per 10,000 people)	IT.NET.HOST.P4	2016-07-01	201607	..	..	..	..	..	..
7	Andorra	ADO	Internet users (per 1,000 people)	IT.NET.USER.P3	2016-07-01	201607	..	..	..	..	..	..
8	Andorra	ADO	Schools connected to the Internet (%)	IT.NET.EDUC.ZS	2016-07-01	201607	..	..	..	..	..	..
9	Andorra	ADO	Secure Internet servers (per 1 million people)	IT.NET.SECR.P6	2016-07-01	201607	923.963	1081.07	895.154	671.919	879.29	1631.83
10	Andorra	ADO	Information and communication technology expenditure per capita (current US$)	IE.ICT.PCAP.CD	2016-07-01	201607	..	..	..	..	..	..
11	Andorra	ADO	Researchers in R&D (per million people)	SP.POP.SCIE.RD.P6	2016-07-01	201607	..	..	..	..	..	..
12	Andorra	ADO	Scientists and engineers in research and dev. (per million people)	SP.POP.SCIE.RD	2016-07-01	201607	..	..	..	..	..	..
13	Andorra	ADO	Pupil-teacher ratio, tertiary	SE.TER.ENRL.TC.ZS	2016-07-01	201607	..	..	3.12739	5.02804	4.88235	..
14	Argentina	ARG	Technicians in R&D (per million people)	SP.POP.TECH.RD.P6	2016-07-01	201607	231.619	252.577	280.649	..	..	..
15	Argentina	ARG	Technicians in research and development (per million people)	SP.POP.TECH.RD	2016-07-01	201607	..	..	..	..	..	..
16	Argentina	ARG	Fixed broadband Internet subscribers (per 100 people)	IT.NET.BBND.P2	2016-07-01	201607	9.97725	11.2255	12.531	15.0822	15.5731	..
17	Argentina	ARG	International Internet bandwidth (bits per second per Internet user)	IT.NET.BNDW.PC	2016-07-01	201607	..	..	..	..	..	..
18	Argentina	ARG	International Internet bandwidth (Mbps)	IT.NET.BNDW	2016-07-01	201607	..	..	..	..	..	..
19	Argentina	ARG	Internet hosts (per 10,000 people)	IT.NET.HOST.P4	2016-07-01	201607	..	..	..	..	..	..
20	Argentina	ARG	Internet users (per 1,000 people)	IT.NET.USER.P3	2016-07-01	201607	..	..	..	..	..	..
21	Argentina	ARG	Schools connected to the Internet (%)	IT.NET.EDUC.ZS	2016-07-01	201607	..	..	..	..	..	..
22	Argentina	ARG	Secure Internet servers (per 1 million people)	IT.NET.SECR.P6	2016-07-01	201607	25.5683	32.8887	40.7885	41.7741	52.7222	63.2935
23	Argentina	ARG	Information and communication technology expenditure per capita (current US$)	IE.ICT.PCAP.CD	2016-07-01	201607	..	..	..	..	..	..
24	Argentina	ARG	Researchers in R&D (per million people)	SP.POP.SCIE.RD.P6	2016-07-01	201607	1154.21	1208.48	1225.74	..	..	..
25	Argentina	ARG	Scientists and engineers in research and dev. (per million people)	SP.POP.SCIE.RD	2016-07-01	201607	..	..	..	..	..	..
26	Argentina	ARG	Pupil-teacher ratio, tertiary	SE.TER.ENRL.TC.ZS	2016-07-01	201607	..	..	..	..	..	..
27	Austria	AUT	Technicians in R&D (per million people)	SP.POP.TECH.RD.P6	2016-07-01	201607	..	2176.7	..	..	..	..
28	Austria	AUT	Technicians in research and development (per million people)	SP.POP.TECH.RD	2016-07-01	201607	..	..	..	..	..	..
29	Austria	AUT	Fixed broadband Internet subscribers (per 100 people)	IT.NET.BBND.P2	2016-07-01	201607	24.4039	24.8752	25.1679	26.2797	27.6669	..
30	Austria	AUT	International Internet bandwidth (bits per second per Internet user)	IT.NET.BNDW.PC	2016-07-01	201607	..	..	..	..	..	..
31	Austria	AUT	International Internet bandwidth (Mbps)	IT.NET.BNDW	2016-07-01	201607	..	..	..	..	..	..
32	Austria	AUT	Internet hosts (per 10,000 people)	IT.NET.HOST.P4	2016-07-01	201607	..	..	..	..	..	..
33	Austria	AUT	Internet users (per 1,000 people)	IT.NET.USER.P3	2016-07-01	201607	..	..	..	..	..	..
34	Austria	AUT	Schools connected to the Internet (%)	IT.NET.EDUC.ZS	2016-07-01	201607	..	..	..	..	..	..
35	Austria	AUT	Secure Internet servers (per 1 million people)	IT.NET.SECR.P6	2016-07-01	201607	858.741	996.468	1139.03	1078.62	1266.63	1500.51
36	Austria	AUT	Information and communication technology expenditure per capita (current US$)	IE.ICT.PCAP.CD	2016-07-01	201607	..	..	..	..	..	..
37	Austria	AUT	Researchers in R&D (per million people)	SP.POP.SCIE.RD.P6	2016-07-01	201607	4359.03	4405.95	4655.2	4703.99	..	..
38	Austria	AUT	Scientists and engineers in research and dev. (per million people)	SP.POP.SCIE.RD	2016-07-01	201607	..	..	..	..	..	..
39	Austria	AUT	Pupil-teacher ratio, tertiary	SE.TER.ENRL.TC.ZS	2016-07-01	201607	7.50653	7.38331	7.46561	7.28747	..	..
40	Bangladesh	BGD	Technicians in R&D (per million people)	SP.POP.TECH.RD.P6	2016-07-01	201607	..	..	..	..	..	..
41	Bangladesh	BGD	Technicians in research and development (per million people)	SP.POP.TECH.RD	2016-07-01	201607	..	..	..	..	..	..
42	Bangladesh	BGD	Fixed broadband Internet subscribers (per 100 people)	IT.NET.BBND.P2	2016-07-01	201607	0.274321	0.306485	0.388157	0.974058	1.95137	..
43	Bangladesh	BGD	International Internet bandwidth (bits per second per Internet user)	IT.NET.BNDW.PC	2016-07-01	201607	..	..	..	..	..	..
44	Bangladesh	BGD	International Internet bandwidth (Mbps)	IT.NET.BNDW	2016-07-01	201607	..	..	..	..	..	..
45	Bangladesh	BGD	Internet hosts (per 10,000 people)	IT.NET.HOST.P4	2016-07-01	201607	..	..	..	..	..	..
46	Bangladesh	BGD	Internet users (per 1,000 people)	IT.NET.USER.P3	2016-07-01	201607	..	..	..	..	..	..
47	Bangladesh	BGD	Schools connected to the Internet (%)	IT.NET.EDUC.ZS	2016-07-01	201607	..	..	..	..	..	..
48	Bangladesh	BGD	Secure Internet servers (per 1 million people)	IT.NET.SECR.P6	2016-07-01	201607	0.309992	0.625792	0.727824	0.763566	0.854929	1.31681
49	Bangladesh	BGD	Information and communication technology expenditure per capita (current US$)	IE.ICT.PCAP.CD	2016-07-01	201607	..	..	..	..	..	..
50	Bangladesh	BGD	Researchers in R&D (per million people)	SP.POP.SCIE.RD.P6	2016-07-01	201607	..	..	..	..	..	..
51	Bangladesh	BGD	Scientists and engineers in research and dev. (per million people)	SP.POP.SCIE.RD	2016-07-01	201607	..	..	..	..	..	..
52	Bangladesh	BGD	Pupil-teacher ratio, tertiary	SE.TER.ENRL.TC.ZS	2016-07-01	201607	..	25.9566	23.0872	..	..	..
53	Belarus	BLR	Technicians in R&D (per million people)	SP.POP.TECH.RD.P6	2016-07-01	201607	..	..	..	..	..	..
54	Belarus	BLR	Technicians in research and development (per million people)	SP.POP.TECH.RD	2016-07-01	201607	..	..	..	..	..	..
55	Belarus	BLR	Fixed broadband Internet subscribers (per 100 people)	IT.NET.BBND.P2	2016-07-01	201607	17.56	22.2009	26.9199	29.7738	28.8403	..
56	Belarus	BLR	International Internet bandwidth (bits per second per Internet user)	IT.NET.BNDW.PC	2016-07-01	201607	..	..	..	..	..	..
57	Belarus	BLR	International Internet bandwidth (Mbps)	IT.NET.BNDW	2016-07-01	201607	..	..	..	..	..	..
58	Belarus	BLR	Internet hosts (per 10,000 people)	IT.NET.HOST.P4	2016-07-01	201607	..	..	..	..	..	..
59	Belarus	BLR	Internet users (per 1,000 people)	IT.NET.USER.P3	2016-07-01	201607	..	..	..	..	..	..
60	Belarus	BLR	Schools connected to the Internet (%)	IT.NET.EDUC.ZS	2016-07-01	201607	..	..	..	..	..	..
61	Belarus	BLR	Secure Internet servers (per 1 million people)	IT.NET.SECR.P6	2016-07-01	201607	9.48367	12.3509	19.5478	26.0934	44.5007	62.8613
62	Belarus	BLR	Information and communication technology expenditure per capita (current US$)	IE.ICT.PCAP.CD	2016-07-01	201607	..	..	..	..	..	..
63	Belarus	BLR	Researchers in R&D (per million people)	SP.POP.SCIE.RD.P6	2016-07-01	201607	..	..	..	..	..	..
64	Belarus	BLR	Scientists and engineers in research and dev. (per million people)	SP.POP.SCIE.RD	2016-07-01	201607	..	..	..	..	..	..
65	Belarus	BLR	Pupil-teacher ratio, tertiary	SE.TER.ENRL.TC.ZS	2016-07-01	201607	14.0247	14.339	13.8421	13.383	16.2372	..
66	Belize	BLZ	Technicians in R&D (per million people)	SP.POP.TECH.RD.P6	2016-07-01	201607	..	..	..	..	..	..
67	Belize	BLZ	Technicians in research and development (per million people)	SP.POP.TECH.RD	2016-07-01	201607	..	..	..	..	..	..
68	Belize	BLZ	Fixed broadband Internet subscribers (per 100 people)	IT.NET.BBND.P2	2016-07-01	201607	2.8889	3.06627	3.07752	2.98283	2.91384	..
69	Belize	BLZ	International Internet bandwidth (bits per second per Internet user)	IT.NET.BNDW.PC	2016-07-01	201607	..	..	..	..	..	..
70	Belize	BLZ	International Internet bandwidth (Mbps)	IT.NET.BNDW	2016-07-01	201607	..	..	..	..	..	..
71	Belize	BLZ	Internet hosts (per 10,000 people)	IT.NET.HOST.P4	2016-07-01	201607	..	..	..	..	..	..
72	Belize	BLZ	Internet users (per 1,000 people)	IT.NET.USER.P3	2016-07-01	201607	..	..	..	..	..	..
73	Belize	BLZ	Schools connected to the Internet (%)	IT.NET.EDUC.ZS	2016-07-01	201607	..	..	..	..	..	..
74	Belize	BLZ	Secure Internet servers (per 1 million people)	IT.NET.SECR.P6	2016-07-01	201607	323.374	325.037	273.235	171.415	210.403	411.927
75	Belize	BLZ	Information and communication technology expenditure per capita (current US$)	IE.ICT.PCAP.CD	2016-07-01	201607	..	..	..	..	..	..
76	Belize	BLZ	Researchers in R&D (per million people)	SP.POP.SCIE.RD.P6	2016-07-01	201607	..	..	..	..	..	..
77	Belize	BLZ	Scientists and engineers in research and dev. (per million people)	SP.POP.SCIE.RD	2016-07-01	201607	..	..	..	..	..	..
78	Belize	BLZ	Pupil-teacher ratio, tertiary	SE.TER.ENRL.TC.ZS	2016-07-01	201607	..	19.953	19.7143	20.2632	..	..
79	Bolivia	BOL	Technicians in R&D (per million people)	SP.POP.TECH.RD.P6	2016-07-01	201607	25.9623	..	..	..	..	..
80	Bolivia	BOL	Technicians in research and development (per million people)	SP.POP.TECH.RD	2016-07-01	201607	..	..	..	..	..	..
81	Bolivia	BOL	Fixed broadband Internet subscribers (per 100 people)	IT.NET.BBND.P2	2016-07-01	201607	0.944686	0.712309	1.1119	1.44406	1.59281	..
82	Bolivia	BOL	International Internet bandwidth (bits per second per Internet user)	IT.NET.BNDW.PC	2016-07-01	201607	..	..	..	..	..	..
83	Bolivia	BOL	International Internet bandwidth (Mbps)	IT.NET.BNDW	2016-07-01	201607	..	..	..	..	..	..
84	Bolivia	BOL	Internet hosts (per 10,000 people)	IT.NET.HOST.P4	2016-07-01	201607	..	..	..	..	..	..
85	Bolivia	BOL	Internet users (per 1,000 people)	IT.NET.USER.P3	2016-07-01	201607	..	..	..	..	..	..
86	Bolivia	BOL	Schools connected to the Internet (%)	IT.NET.EDUC.ZS	2016-07-01	201607	..	..	..	..	..	..
87	Bolivia	BOL	Secure Internet servers (per 1 million people)	IT.NET.SECR.P6	2016-07-01	201607	7.96512	9.52547	9.96214	9.13468	12.8765	15.758
88	Bolivia	BOL	Information and communication technology expenditure per capita (current US$)	IE.ICT.PCAP.CD	2016-07-01	201607	..	..	..	..	..	..
89	Bolivia	BOL	Researchers in R&D (per million people)	SP.POP.SCIE.RD.P6	2016-07-01	201607	165.954	..	..	..	..	..
90	Bolivia	BOL	Scientists and engineers in research and dev. (per million people)	SP.POP.SCIE.RD	2016-07-01	201607	..	..	..	..	..	..
91	Bolivia	BOL	Pupil-teacher ratio, tertiary	SE.TER.ENRL.TC.ZS	2016-07-01	201607	..	..	..	..	..	..
92	Botswana	BWA	Technicians in R&D (per million people)	SP.POP.TECH.RD.P6	2016-07-01	201607	..	..	69.3916	..	..	..
93	Botswana	BWA	Technicians in research and development (per million people)	SP.POP.TECH.RD	2016-07-01	201607	..	..	..	..	..	..
94	Botswana	BWA	Fixed broadband Internet subscribers (per 100 people)	IT.NET.BBND.P2	2016-07-01	201607	0.608224	0.962651	1.10963	1.06821	1.63299	..
95	Botswana	BWA	International Internet bandwidth (bits per second per Internet user)	IT.NET.BNDW.PC	2016-07-01	201607	..	..	..	..	..	..
96	Botswana	BWA	International Internet bandwidth (Mbps)	IT.NET.BNDW	2016-07-01	201607	..	..	..	..	..	..
97	Botswana	BWA	Internet hosts (per 10,000 people)	IT.NET.HOST.P4	2016-07-01	201607	..	..	..	..	..	..
98	Botswana	BWA	Internet users (per 1,000 people)	IT.NET.USER.P3	2016-07-01	201607	..	..	..	..	..	..
99	Botswana	BWA	Schools connected to the Internet (%)	IT.NET.EDUC.ZS	2016-07-01	201607	..	..	..	..	..	..
100	Botswana	BWA	Secure Internet servers (per 1 million people)	IT.NET.SECR.P6	2016-07-01	201607	8.30147	8.61365	10.7838	9.64847	11.2616	17.2377
101	Botswana	BWA	Information and communication technology expenditure per capita (current US$)	IE.ICT.PCAP.CD	2016-07-01	201607	..	..	..	..	..	..
102	Botswana	BWA	Researchers in R&D (per million people)	SP.POP.SCIE.RD.P6	2016-07-01	201607	..	..	164.899	..	..	..
103	Botswana	BWA	Scientists and engineers in research and dev. (per million people)	SP.POP.SCIE.RD	2016-07-01	201607	..	..	..	..	..	..
104	Botswana	BWA	Pupil-teacher ratio, tertiary	SE.TER.ENRL.TC.ZS	2016-07-01	201607	..	..	18.6334	..	..	..
105	Bulgaria	BGR	Technicians in R&D (per million people)	SP.POP.TECH.RD.P6	2016-07-01	201607	500.047	443.63	..	..	..	..
106	Bulgaria	BGR	Technicians in research and development (per million people)	SP.POP.TECH.RD	2016-07-01	201607	..	..	..	..	..	..
107	Bulgaria	BGR	Fixed broadband Internet subscribers (per 100 people)	IT.NET.BBND.P2	2016-07-01	201607	15.2212	17.1386	18.2987	19.6811	20.6597	..
108	Bulgaria	BGR	International Internet bandwidth (bits per second per Internet user)	IT.NET.BNDW.PC	2016-07-01	201607	..	..	..	..	..	..
109	Bulgaria	BGR	International Internet bandwidth (Mbps)	IT.NET.BNDW	2016-07-01	201607	..	..	..	..	..	..
110	Bulgaria	BGR	Internet hosts (per 10,000 people)	IT.NET.HOST.P4	2016-07-01	201607	..	..	..	..	..	..
111	Bulgaria	BGR	Internet users (per 1,000 people)	IT.NET.USER.P3	2016-07-01	201607	..	..	..	..	..	..
112	Bulgaria	BGR	Schools connected to the Internet (%)	IT.NET.EDUC.ZS	2016-07-01	201607	..	..	..	..	..	..
113	Bulgaria	BGR	Secure Internet servers (per 1 million people)	IT.NET.SECR.P6	2016-07-01	201607	74.9094	141.529	164.114	145.903	176.773	181.527
114	Bulgaria	BGR	Information and communication technology expenditure per capita (current US$)	IE.ICT.PCAP.CD	2016-07-01	201607	..	..	..	..	..	..
115	Bulgaria	BGR	Researchers in R&D (per million people)	SP.POP.SCIE.RD.P6	2016-07-01	201607	1482.19	1618.17	1547.15	1692.51	..	..
116	Bulgaria	BGR	Scientists and engineers in research and dev. (per million people)	SP.POP.SCIE.RD	2016-07-01	201607	..	..	..	..	..	..
117	Bulgaria	BGR	Pupil-teacher ratio, tertiary	SE.TER.ENRL.TC.ZS	2016-07-01	201607	13.7658	13.8156	12.4154	12.106	12.3107	..
118	Burundi	BDI	Technicians in R&D (per million people)	SP.POP.TECH.RD.P6	2016-07-01	201607	..	..	..	..	..	..
119	Burundi	BDI	Technicians in research and development (per million people)	SP.POP.TECH.RD	2016-07-01	201607	..	..	..	..	..	..
120	Burundi	BDI	Fixed broadband Internet subscribers (per 100 people)	IT.NET.BBND.P2	2016-07-01	201607	0.00381251	0.00520945	0.00712722	0.0150947	0.0162171	..
121	Burundi	BDI	International Internet bandwidth (bits per second per Internet user)	IT.NET.BNDW.PC	2016-07-01	201607	..	..	..	..	..	..
122	Burundi	BDI	International Internet bandwidth (Mbps)	IT.NET.BNDW	2016-07-01	201607	..	..	..	..	..	..
123	Burundi	BDI	Internet hosts (per 10,000 people)	IT.NET.HOST.P4	2016-07-01	201607	..	..	..	..	..	..
124	Burundi	BDI	Internet users (per 1,000 people)	IT.NET.USER.P3	2016-07-01	201607	..	..	..	..	..	..
125	Burundi	BDI	Schools connected to the Internet (%)	IT.NET.EDUC.ZS	2016-07-01	201607	..	..	..	..	..	..
126	Burundi	BDI	Secure Internet servers (per 1 million people)	IT.NET.SECR.P6	2016-07-01	201607	0.211392	0.102143	0.296309	0.286644	0.55469	0.536724
127	Burundi	BDI	Information and communication technology expenditure per capita (current US$)	IE.ICT.PCAP.CD	2016-07-01	201607	..	..	..	..	..	..
128	Burundi	BDI	Researchers in R&D (per million people)	SP.POP.SCIE.RD.P6	2016-07-01	201607	..	..	..	..	..	..
129	Burundi	BDI	Scientists and engineers in research and dev. (per million people)	SP.POP.SCIE.RD	2016-07-01	201607	..	..	..	..	..	..
130	Burundi	BDI	Pupil-teacher ratio, tertiary	SE.TER.ENRL.TC.ZS	2016-07-01	201607	16.4064	15.7202	20.2122	14.6738	..	..
131	Cameroon	CMR	Technicians in R&D (per million people)	SP.POP.TECH.RD.P6	2016-07-01	201607	..	..	..	..	..	..
132	Cameroon	CMR	Technicians in research and development (per million people)	SP.POP.TECH.RD	2016-07-01	201607	..	..	..	..	..	..
133	Cameroon	CMR	Fixed broadband Internet subscribers (per 100 people)	IT.NET.BBND.P2	2016-07-01	201607	0.0288688	0.0506375	0.0638075	0.0759415	0.071205	..
134	Cameroon	CMR	International Internet bandwidth (bits per second per Internet user)	IT.NET.BNDW.PC	2016-07-01	201607	..	..	..	..	..	..
135	Cameroon	CMR	International Internet bandwidth (Mbps)	IT.NET.BNDW	2016-07-01	201607	..	..	..	..	..	..
136	Cameroon	CMR	Internet hosts (per 10,000 people)	IT.NET.HOST.P4	2016-07-01	201607	..	..	..	..	..	..
137	Cameroon	CMR	Internet users (per 1,000 people)	IT.NET.USER.P3	2016-07-01	201607	..	..	..	..	..	..
138	Cameroon	CMR	Schools connected to the Internet (%)	IT.NET.EDUC.ZS	2016-07-01	201607	..	..	..	..	..	..
139	Cameroon	CMR	Secure Internet servers (per 1 million people)	IT.NET.SECR.P6	2016-07-01	201607	0.534223	0.994362	1.2004	1.48574	1.66864	2.48456
140	Cameroon	CMR	Information and communication technology expenditure per capita (current US$)	IE.ICT.PCAP.CD	2016-07-01	201607	..	..	..	..	..	..
141	Cameroon	CMR	Researchers in R&D (per million people)	SP.POP.SCIE.RD.P6	2016-07-01	201607	..	..	..	..	..	..
142	Cameroon	CMR	Scientists and engineers in research and dev. (per million people)	SP.POP.SCIE.RD	2016-07-01	201607	..	..	..	..	..	..
143	Cameroon	CMR	Pupil-teacher ratio, tertiary	SE.TER.ENRL.TC.ZS	2016-07-01	201607	52.0262	..	..	..	..	..
144	Cape Verde	CPV	Technicians in R&D (per million people)	SP.POP.TECH.RD.P6	2016-07-01	201607	..	8.07821	..	..	..	..
145	Cape Verde	CPV	Technicians in research and development (per million people)	SP.POP.TECH.RD	2016-07-01	201607	..	..	..	..	..	..
146	Cape Verde	CPV	Fixed broadband Internet subscribers (per 100 people)	IT.NET.BBND.P2	2016-07-01	201607	3.29593	4.34854	4.01557	4.25178	3.44296	..
147	Cape Verde	CPV	International Internet bandwidth (bits per second per Internet user)	IT.NET.BNDW.PC	2016-07-01	201607	..	..	..	..	..	..
148	Cape Verde	CPV	International Internet bandwidth (Mbps)	IT.NET.BNDW	2016-07-01	201607	..	..	..	..	..	..
149	Cape Verde	CPV	Internet hosts (per 10,000 people)	IT.NET.HOST.P4	2016-07-01	201607	..	..	..	..	..	..
150	Cape Verde	CPV	Internet users (per 1,000 people)	IT.NET.USER.P3	2016-07-01	201607	..	..	..	..	..	..
151	Cape Verde	CPV	Schools connected to the Internet (%)	IT.NET.EDUC.ZS	2016-07-01	201607	..	..	..	..	..	..
152	Cape Verde	CPV	Secure Internet servers (per 1 million people)	IT.NET.SECR.P6	2016-07-01	201607	14.2747	16.1564	23.9583	25.628	50.5929	51.873
153	Cape Verde	CPV	Information and communication technology expenditure per capita (current US$)	IE.ICT.PCAP.CD	2016-07-01	201607	..	..	..	..	..	..
154	Cape Verde	CPV	Researchers in R&D (per million people)	SP.POP.SCIE.RD.P6	2016-07-01	201607	..	50.4888	..	..	..	..
155	Cape Verde	CPV	Scientists and engineers in research and dev. (per million people)	SP.POP.SCIE.RD	2016-07-01	201607	..	..	..	..	..	..
156	Cape Verde	CPV	Pupil-teacher ratio, tertiary	SE.TER.ENRL.TC.ZS	2016-07-01	201607	10.9546	9.3479	8.96657	9.40821	9.46784	..
157	China	CHN	Technicians in R&D (per million people)	SP.POP.TECH.RD.P6	2016-07-01	201607	..	..	..	..	..	..
158	China	CHN	Technicians in research and development (per million people)	SP.POP.TECH.RD	2016-07-01	201607	..	..	..	..	..	..
159	China	CHN	Fixed broadband Internet subscribers (per 100 people)	IT.NET.BBND.P2	2016-07-01	201607	9.2907	11.4354	12.7215	13.6341	14.3841	..
160	China	CHN	International Internet bandwidth (bits per second per Internet user)	IT.NET.BNDW.PC	2016-07-01	201607	..	..	..	..	..	..
161	China	CHN	International Internet bandwidth (Mbps)	IT.NET.BNDW	2016-07-01	201607	..	..	..	..	..	..
162	China	CHN	Internet hosts (per 10,000 people)	IT.NET.HOST.P4	2016-07-01	201607	..	..	..	..	..	..
163	China	CHN	Internet users (per 1,000 people)	IT.NET.USER.P3	2016-07-01	201607	..	..	..	..	..	..
164	China	CHN	Schools connected to the Internet (%)	IT.NET.EDUC.ZS	2016-07-01	201607	..	..	..	..	..	..
165	China	CHN	Secure Internet servers (per 1 million people)	IT.NET.SECR.P6	2016-07-01	201607	1.92045	2.42536	3.13764	3.87364	7.0382	10.1173
166	China	CHN	Information and communication technology expenditure per capita (current US$)	IE.ICT.PCAP.CD	2016-07-01	201607	..	..	..	..	..	..
167	China	CHN	Researchers in R&D (per million people)	SP.POP.SCIE.RD.P6	2016-07-01	201607	902.96	977.682	1035.88	1089.19	..	..
168	China	CHN	Scientists and engineers in research and dev. (per million people)	SP.POP.SCIE.RD	2016-07-01	201607	..	..	..	..	..	..
169	China	CHN	Pupil-teacher ratio, tertiary	SE.TER.ENRL.TC.ZS	2016-07-01	201607	19.9411	19.4879	..	..	..	..
170	Colombia	COL	Technicians in R&D (per million people)	SP.POP.TECH.RD.P6	2016-07-01	201607	..	..	..	..	..	..
171	Colombia	COL	Technicians in research and development (per million people)	SP.POP.TECH.RD	2016-07-01	201607	..	..	..	..	..	..
172	Colombia	COL	Fixed broadband Internet subscribers (per 100 people)	IT.NET.BBND.P2	2016-07-01	201607	5.6907	7.11178	8.25638	9.3905	10.2728	..
173	Colombia	COL	International Internet bandwidth (bits per second per Internet user)	IT.NET.BNDW.PC	2016-07-01	201607	..	..	..	..	..	..
174	Colombia	COL	International Internet bandwidth (Mbps)	IT.NET.BNDW	2016-07-01	201607	..	..	..	..	..	..
175	Colombia	COL	Internet hosts (per 10,000 people)	IT.NET.HOST.P4	2016-07-01	201607	..	..	..	..	..	..
176	Colombia	COL	Internet users (per 1,000 people)	IT.NET.USER.P3	2016-07-01	201607	..	..	..	..	..	..
177	Colombia	COL	Schools connected to the Internet (%)	IT.NET.EDUC.ZS	2016-07-01	201607	..	..	..	..	..	..
178	Colombia	COL	Secure Internet servers (per 1 million people)	IT.NET.SECR.P6	2016-07-01	201607	14.4388	21.4625	28.9456	34.1766	47.1424	57.2895
179	Colombia	COL	Information and communication technology expenditure per capita (current US$)	IE.ICT.PCAP.CD	2016-07-01	201607	..	..	..	..	..	..
180	Colombia	COL	Researchers in R&D (per million people)	SP.POP.SCIE.RD.P6	2016-07-01	201607	184.884	160.659	164.29	..	..	..
181	Colombia	COL	Scientists and engineers in research and dev. (per million people)	SP.POP.SCIE.RD	2016-07-01	201607	..	..	..	..	..	..
182	Colombia	COL	Pupil-teacher ratio, tertiary	SE.TER.ENRL.TC.ZS	2016-07-01	201607	..	..	..	18.0569	17.3501	..
183	Congo	COG	Technicians in R&D (per million people)	SP.POP.TECH.RD.P6	2016-07-01	201607	..	..	..	..	..	..
184	Congo	COG	Technicians in research and development (per million people)	SP.POP.TECH.RD	2016-07-01	201607	..	..	..	..	..	..
185	Congo	COG	Fixed broadband Internet subscribers (per 100 people)	IT.NET.BBND.P2	2016-07-01	201607	0.00608019	0.0310269	0.0320955	0.00984794	0.0109683	..
186	Congo	COG	International Internet bandwidth (bits per second per Internet user)	IT.NET.BNDW.PC	2016-07-01	201607	..	..	..	..	..	..
187	Congo	COG	International Internet bandwidth (Mbps)	IT.NET.BNDW	2016-07-01	201607	..	..	..	..	..	..
188	Congo	COG	Internet hosts (per 10,000 people)	IT.NET.HOST.P4	2016-07-01	201607	..	..	..	..	..	..
189	Congo	COG	Internet users (per 1,000 people)	IT.NET.USER.P3	2016-07-01	201607	..	..	..	..	..	..
190	Congo	COG	Schools connected to the Internet (%)	IT.NET.EDUC.ZS	2016-07-01	201607	..	..	..	..	..	..
191	Congo	COG	Secure Internet servers (per 1 million people)	IT.NET.SECR.P6	2016-07-01	201607	1.22969	1.19691	1.39985	1.13783	1.55384	1.73148
192	Congo	COG	Information and communication technology expenditure per capita (current US$)	IE.ICT.PCAP.CD	2016-07-01	201607	..	..	..	..	..	..
193	Congo	COG	Researchers in R&D (per million people)	SP.POP.SCIE.RD.P6	2016-07-01	201607	..	..	..	..	..	..
194	Congo	COG	Scientists and engineers in research and dev. (per million people)	SP.POP.SCIE.RD	2016-07-01	201607	..	..	..	..	..	..
195	Congo	COG	Pupil-teacher ratio, tertiary	SE.TER.ENRL.TC.ZS	2016-07-01	201607	..	11.5284	11.849	12.2599	..	..
196	Costa Rica	CRI	Technicians in R&D (per million people)	SP.POP.TECH.RD.P6	2016-07-01	201607	..	..	..	..	..	..
197	Costa Rica	CRI	Technicians in research and development (per million people)	SP.POP.TECH.RD	2016-07-01	201607	..	..	..	..	..	..
198	Costa Rica	CRI	Fixed broadband Internet subscribers (per 100 people)	IT.NET.BBND.P2	2016-07-01	201607	8.48584	8.8605	9.33541	9.9521	10.5218	..
199	Costa Rica	CRI	International Internet bandwidth (bits per second per Internet user)	IT.NET.BNDW.PC	2016-07-01	201607	..	..	..	..	..	..
200	Costa Rica	CRI	International Internet bandwidth (Mbps)	IT.NET.BNDW	2016-07-01	201607	..	..	..	..	..	..
201	Costa Rica	CRI	Internet hosts (per 10,000 people)	IT.NET.HOST.P4	2016-07-01	201607	..	..	..	..	..	..
202	Costa Rica	CRI	Internet users (per 1,000 people)	IT.NET.USER.P3	2016-07-01	201607	..	..	..	..	..	..
203	Costa Rica	CRI	Schools connected to the Internet (%)	IT.NET.EDUC.ZS	2016-07-01	201607	..	..	..	..	..	..
204	Costa Rica	CRI	Secure Internet servers (per 1 million people)	IT.NET.SECR.P6	2016-07-01	201607	110.444	114.336	97.9771	81.8029	99.4198	103.581
205	Costa Rica	CRI	Information and communication technology expenditure per capita (current US$)	IE.ICT.PCAP.CD	2016-07-01	201607	..	..	..	..	..	..
206	Costa Rica	CRI	Researchers in R&D (per million people)	SP.POP.SCIE.RD.P6	2016-07-01	201607	1232.71	1327.47	..	..	..	..
207	Costa Rica	CRI	Scientists and engineers in research and dev. (per million people)	SP.POP.SCIE.RD	2016-07-01	201607	..	..	..	..	..	..
208	Costa Rica	CRI	Pupil-teacher ratio, tertiary	SE.TER.ENRL.TC.ZS	2016-07-01	201607	..	..	..	..	..	..
209	Croatia	HRV	Technicians in R&D (per million people)	SP.POP.TECH.RD.P6	2016-07-01	201607	602.582	622.955	618.379	660.19	..	..
210	Croatia	HRV	Technicians in research and development (per million people)	SP.POP.TECH.RD	2016-07-01	201607	..	..	..	..	..	..
211	Croatia	HRV	Fixed broadband Internet subscribers (per 100 people)	IT.NET.BBND.P2	2016-07-01	201607	19.3144	20.6492	21.3404	22.256	23.0448	..
212	Croatia	HRV	International Internet bandwidth (bits per second per Internet user)	IT.NET.BNDW.PC	2016-07-01	201607	..	..	..	..	..	..
213	Croatia	HRV	International Internet bandwidth (Mbps)	IT.NET.BNDW	2016-07-01	201607	..	..	..	..	..	..
214	Croatia	HRV	Internet hosts (per 10,000 people)	IT.NET.HOST.P4	2016-07-01	201607	..	..	..	..	..	..
215	Croatia	HRV	Internet users (per 1,000 people)	IT.NET.USER.P3	2016-07-01	201607	..	..	..	..	..	..
216	Croatia	HRV	Schools connected to the Internet (%)	IT.NET.EDUC.ZS	2016-07-01	201607	..	..	..	..	..	..
217	Croatia	HRV	Secure Internet servers (per 1 million people)	IT.NET.SECR.P6	2016-07-01	201607	168.863	231.275	245.105	193.153	219.423	264.416
218	Croatia	HRV	Information and communication technology expenditure per capita (current US$)	IE.ICT.PCAP.CD	2016-07-01	201607	..	..	..	..	..	..
219	Croatia	HRV	Researchers in R&D (per million people)	SP.POP.SCIE.RD.P6	2016-07-01	201607	1645.81	1591.56	1560.06	1528.5	..	..
220	Croatia	HRV	Scientists and engineers in research and dev. (per million people)	SP.POP.SCIE.RD	2016-07-01	201607	..	..	..	..	..	..
221	Croatia	HRV	Pupil-teacher ratio, tertiary	SE.TER.ENRL.TC.ZS	2016-07-01	201607	9.53203	9.4344	9.26592	..	..	..
222	Czech Republic	CZE	Technicians in R&D (per million people)	SP.POP.TECH.RD.P6	2016-07-01	201607	1520.06	1624.14	1745.59	1795.35	..	..
223	Czech Republic	CZE	Technicians in research and development (per million people)	SP.POP.TECH.RD	2016-07-01	201607	..	..	..	..	..	..
224	Czech Republic	CZE	Fixed broadband Internet subscribers (per 100 people)	IT.NET.BBND.P2	2016-07-01	201607	21.4255	23.6461	24.9246	26.6877	27.8835	..
225	Czech Republic	CZE	International Internet bandwidth (bits per second per Internet user)	IT.NET.BNDW.PC	2016-07-01	201607	..	..	..	..	..	..
226	Czech Republic	CZE	International Internet bandwidth (Mbps)	IT.NET.BNDW	2016-07-01	201607	..	..	..	..	..	..
227	Czech Republic	CZE	Internet hosts (per 10,000 people)	IT.NET.HOST.P4	2016-07-01	201607	..	..	..	..	..	..
228	Czech Republic	CZE	Internet users (per 1,000 people)	IT.NET.USER.P3	2016-07-01	201607	..	..	..	..	..	..
229	Czech Republic	CZE	Schools connected to the Internet (%)	IT.NET.EDUC.ZS	2016-07-01	201607	..	..	..	..	..	..
230	Czech Republic	CZE	Secure Internet servers (per 1 million people)	IT.NET.SECR.P6	2016-07-01	201607	319.732	389.002	518.8	563.9	690.619	866.819
231	Czech Republic	CZE	Information and communication technology expenditure per capita (current US$)	IE.ICT.PCAP.CD	2016-07-01	201607	..	..	..	..	..	..
232	Czech Republic	CZE	Researchers in R&D (per million people)	SP.POP.SCIE.RD.P6	2016-07-01	201607	2781.85	2912.63	3149.99	3249.89	..	..
233	Czech Republic	CZE	Scientists and engineers in research and dev. (per million people)	SP.POP.SCIE.RD	2016-07-01	201607	..	..	..	..	..	..
234	Czech Republic	CZE	Pupil-teacher ratio, tertiary	SE.TER.ENRL.TC.ZS	2016-07-01	201607	..	24.7841	25.1906	26.0222	..	..
235	Dem. People's Rep. Korea	PRK	Technicians in R&D (per million people)	SP.POP.TECH.RD.P6	2016-07-01	201607	..	..	..	..	..	..
236	Dem. People's Rep. Korea	PRK	Technicians in research and development (per million people)	SP.POP.TECH.RD	2016-07-01	201607	..	..	..	..	..	..
237	Dem. People's Rep. Korea	PRK	Fixed broadband Internet subscribers (per 100 people)	IT.NET.BBND.P2	2016-07-01	201607	..	..	..	..	..	..
238	Dem. People's Rep. Korea	PRK	International Internet bandwidth (bits per second per Internet user)	IT.NET.BNDW.PC	2016-07-01	201607	..	..	..	..	..	..
239	Dem. People's Rep. Korea	PRK	International Internet bandwidth (Mbps)	IT.NET.BNDW	2016-07-01	201607	..	..	..	..	..	..
240	Dem. People's Rep. Korea	PRK	Internet hosts (per 10,000 people)	IT.NET.HOST.P4	2016-07-01	201607	..	..	..	..	..	..
241	Dem. People's Rep. Korea	PRK	Internet users (per 1,000 people)	IT.NET.USER.P3	2016-07-01	201607	..	..	..	..	..	..
242	Dem. People's Rep. Korea	PRK	Schools connected to the Internet (%)	IT.NET.EDUC.ZS	2016-07-01	201607	..	..	..	..	..	..
243	Dem. People's Rep. Korea	PRK	Secure Internet servers (per 1 million people)	IT.NET.SECR.P6	2016-07-01	201607	..	..	..	0.0401676	0.0799144	0.039753
244	Dem. People's Rep. Korea	PRK	Information and communication technology expenditure per capita (current US$)	IE.ICT.PCAP.CD	2016-07-01	201607	..	..	..	..	..	..
245	Dem. People's Rep. Korea	PRK	Researchers in R&D (per million people)	SP.POP.SCIE.RD.P6	2016-07-01	201607	..	..	..	..	..	..
246	Dem. People's Rep. Korea	PRK	Scientists and engineers in research and dev. (per million people)	SP.POP.SCIE.RD	2016-07-01	201607	..	..	..	..	..	..
247	Dem. People's Rep. Korea	PRK	Pupil-teacher ratio, tertiary	SE.TER.ENRL.TC.ZS	2016-07-01	201607	..	..	..	..	..	..
248	Djibouti	DJI	Technicians in R&D (per million people)	SP.POP.TECH.RD.P6	2016-07-01	201607	..	..	..	..	..	..
249	Djibouti	DJI	Technicians in research and development (per million people)	SP.POP.TECH.RD	2016-07-01	201607	..	..	..	..	..	..
250	Djibouti	DJI	Fixed broadband Internet subscribers (per 100 people)	IT.NET.BBND.P2	2016-07-01	201607	0.966145	1.33491	1.73407	2.02822	2.26805	..
251	Djibouti	DJI	International Internet bandwidth (bits per second per Internet user)	IT.NET.BNDW.PC	2016-07-01	201607	..	..	..	..	..	..
252	Djibouti	DJI	International Internet bandwidth (Mbps)	IT.NET.BNDW	2016-07-01	201607	..	..	..	..	..	..
253	Djibouti	DJI	Internet hosts (per 10,000 people)	IT.NET.HOST.P4	2016-07-01	201607	..	..	..	..	..	..
254	Djibouti	DJI	Internet users (per 1,000 people)	IT.NET.USER.P3	2016-07-01	201607	..	..	..	..	..	..
255	Djibouti	DJI	Schools connected to the Internet (%)	IT.NET.EDUC.ZS	2016-07-01	201607	..	..	..	..	..	..
256	Djibouti	DJI	Secure Internet servers (per 1 million people)	IT.NET.SECR.P6	2016-07-01	201607	6.01828	5.93964	4.68895	4.62666	10.2719	9.01042
257	Djibouti	DJI	Information and communication technology expenditure per capita (current US$)	IE.ICT.PCAP.CD	2016-07-01	201607	..	..	..	..	..	..
258	Djibouti	DJI	Researchers in R&D (per million people)	SP.POP.SCIE.RD.P6	2016-07-01	201607	..	..	..	..	..	..
259	Djibouti	DJI	Scientists and engineers in research and dev. (per million people)	SP.POP.SCIE.RD	2016-07-01	201607	..	..	..	..	..	..
260	Djibouti	DJI	Pupil-teacher ratio, tertiary	SE.TER.ENRL.TC.ZS	2016-07-01	201607	20.5414	19.2041	..	..	..	..
261	East Asia & Pacific	EAP	Technicians in R&D (per million people)	SP.POP.TECH.RD.P6	2016-07-01	201607	..	..	..	..	..	..
262	East Asia & Pacific	EAP	Technicians in research and development (per million people)	SP.POP.TECH.RD	2016-07-01	201607	..	..	..	..	..	..
263	East Asia & Pacific	EAP	Fixed broadband Internet subscribers (per 100 people)	IT.NET.BBND.P2	2016-07-01	201607	7.10776	8.99822	10.2386	11.1207	11.9394	..
264	East Asia & Pacific	EAP	International Internet bandwidth (bits per second per Internet user)	IT.NET.BNDW.PC	2016-07-01	201607	..	..	..	..	..	..
265	East Asia & Pacific	EAP	International Internet bandwidth (Mbps)	IT.NET.BNDW	2016-07-01	201607	..	..	..	..	..	..
266	East Asia & Pacific	EAP	Internet hosts (per 10,000 people)	IT.NET.HOST.P4	2016-07-01	201607	..	..	..	..	..	..
267	East Asia & Pacific	EAP	Internet users (per 1,000 people)	IT.NET.USER.P3	2016-07-01	201607	..	..	..	..	..	..
268	East Asia & Pacific	EAP	Schools connected to the Internet (%)	IT.NET.EDUC.ZS	2016-07-01	201607	..	..	..	..	..	..
269	East Asia & Pacific	EAP	Secure Internet servers (per 1 million people)	IT.NET.SECR.P6	2016-07-01	201607	3.20523	4.193	5.14991	5.60237	8.85455	11.9291
270	East Asia & Pacific	EAP	Information and communication technology expenditure per capita (current US$)	IE.ICT.PCAP.CD	2016-07-01	201607	..	..	..	..	..	..
271	East Asia & Pacific	EAP	Researchers in R&D (per million people)	SP.POP.SCIE.RD.P6	2016-07-01	201607	914.574	970.914	1051.82	1089.19	..	..
272	East Asia & Pacific	EAP	Scientists and engineers in research and dev. (per million people)	SP.POP.SCIE.RD	2016-07-01	201607	..	..	..	..	..	..
273	East Asia & Pacific	EAP	Pupil-teacher ratio, tertiary	SE.TER.ENRL.TC.ZS	2016-07-01	201607	..	..	..	..	..	..
274	EASTERN EUROPE	EER	Technicians in R&D (per million people)	SP.POP.TECH.RD.P6	2016-07-01	201607	..	..	..	..	..	..
275	EASTERN EUROPE	EER	Technicians in research and development (per million people)	SP.POP.TECH.RD	2016-07-01	201607	..	..	..	..	..	..
276	EASTERN EUROPE	EER	Fixed broadband Internet subscribers (per 100 people)	IT.NET.BBND.P2	2016-07-01	201607	..	..	..	..	..	..
277	EASTERN EUROPE	EER	International Internet bandwidth (bits per second per Internet user)	IT.NET.BNDW.PC	2016-07-01	201607	..	..	..	..	..	..
278	EASTERN EUROPE	EER	International Internet bandwidth (Mbps)	IT.NET.BNDW	2016-07-01	201607	..	..	..	..	..	..
279	EASTERN EUROPE	EER	Internet hosts (per 10,000 people)	IT.NET.HOST.P4	2016-07-01	201607	..	..	..	..	..	..
280	EASTERN EUROPE	EER	Internet users (per 1,000 people)	IT.NET.USER.P3	2016-07-01	201607	..	..	..	..	..	..
281	EASTERN EUROPE	EER	Schools connected to the Internet (%)	IT.NET.EDUC.ZS	2016-07-01	201607	..	..	..	..	..	..
282	EASTERN EUROPE	EER	Secure Internet servers (per 1 million people)	IT.NET.SECR.P6	2016-07-01	201607	..	..	..	..	..	..
283	EASTERN EUROPE	EER	Information and communication technology expenditure per capita (current US$)	IE.ICT.PCAP.CD	2016-07-01	201607	..	..	..	..	..	..
284	EASTERN EUROPE	EER	Researchers in R&D (per million people)	SP.POP.SCIE.RD.P6	2016-07-01	201607	..	..	..	..	..	..
285	EASTERN EUROPE	EER	Scientists and engineers in research and dev. (per million people)	SP.POP.SCIE.RD	2016-07-01	201607	..	..	..	..	..	..
286	EASTERN EUROPE	EER	Pupil-teacher ratio, tertiary	SE.TER.ENRL.TC.ZS	2016-07-01	201607	..	..	..	..	..	..
287	Equatorial Guinea	GNQ	Technicians in R&D (per million people)	SP.POP.TECH.RD.P6	2016-07-01	201607	..	..	..	..	..	..
288	Equatorial Guinea	GNQ	Technicians in research and development (per million people)	SP.POP.TECH.RD	2016-07-01	201607	..	..	..	..	..	..
289	Equatorial Guinea	GNQ	Fixed broadband Internet subscribers (per 100 people)	IT.NET.BBND.P2	2016-07-01	201607	0.170361	0.18799	0.201006	0.464721	0.498804	..
290	Equatorial Guinea	GNQ	International Internet bandwidth (bits per second per Internet user)	IT.NET.BNDW.PC	2016-07-01	201607	..	..	..	..	..	..
291	Equatorial Guinea	GNQ	International Internet bandwidth (Mbps)	IT.NET.BNDW	2016-07-01	201607	..	..	..	..	..	..
292	Equatorial Guinea	GNQ	Internet hosts (per 10,000 people)	IT.NET.HOST.P4	2016-07-01	201607	..	..	..	..	..	..
293	Equatorial Guinea	GNQ	Internet users (per 1,000 people)	IT.NET.USER.P3	2016-07-01	201607	..	..	..	..	..	..
294	Equatorial Guinea	GNQ	Schools connected to the Internet (%)	IT.NET.EDUC.ZS	2016-07-01	201607	..	..	..	..	..	..
295	Equatorial Guinea	GNQ	Secure Internet servers (per 1 million people)	IT.NET.SECR.P6	2016-07-01	201607	2.74458	2.66341	1.29244	1.25458	3.65459	3.55004
296	Equatorial Guinea	GNQ	Information and communication technology expenditure per capita (current US$)	IE.ICT.PCAP.CD	2016-07-01	201607	..	..	..	..	..	..
297	Equatorial Guinea	GNQ	Researchers in R&D (per million people)	SP.POP.SCIE.RD.P6	2016-07-01	201607	..	..	..	..	..	..
298	Equatorial Guinea	GNQ	Scientists and engineers in research and dev. (per million people)	SP.POP.SCIE.RD	2016-07-01	201607	..	..	..	..	..	..
299	Equatorial Guinea	GNQ	Pupil-teacher ratio, tertiary	SE.TER.ENRL.TC.ZS	2016-07-01	201607	..	..	..	..	..	..
300	Estonia	EST	Technicians in R&D (per million people)	SP.POP.TECH.RD.P6	2016-07-01	201607	680.885	661.864	708.438	801.485	..	..
301	Estonia	EST	Technicians in research and development (per million people)	SP.POP.TECH.RD	2016-07-01	201607	..	..	..	..	..	..
302	Estonia	EST	Fixed broadband Internet subscribers (per 100 people)	IT.NET.BBND.P2	2016-07-01	201607	26.7905	26.9561	27.0772	28.0402	28.8999	..
303	Estonia	EST	International Internet bandwidth (bits per second per Internet user)	IT.NET.BNDW.PC	2016-07-01	201607	..	..	..	..	..	..
304	Estonia	EST	International Internet bandwidth (Mbps)	IT.NET.BNDW	2016-07-01	201607	..	..	..	..	..	..
305	Estonia	EST	Internet hosts (per 10,000 people)	IT.NET.HOST.P4	2016-07-01	201607	..	..	..	..	..	..
306	Estonia	EST	Internet users (per 1,000 people)	IT.NET.USER.P3	2016-07-01	201607	..	..	..	..	..	..
307	Estonia	EST	Schools connected to the Internet (%)	IT.NET.EDUC.ZS	2016-07-01	201607	..	..	..	..	..	..
308	Estonia	EST	Secure Internet servers (per 1 million people)	IT.NET.SECR.P6	2016-07-01	201607	437.109	537.878	668.332	752.657	926.556	1145.58
309	Estonia	EST	Information and communication technology expenditure per capita (current US$)	IE.ICT.PCAP.CD	2016-07-01	201607	..	..	..	..	..	..
310	Estonia	EST	Researchers in R&D (per million people)	SP.POP.SCIE.RD.P6	2016-07-01	201607	3060.61	3396.66	3460.62	3338.51	..	..
311	Estonia	EST	Scientists and engineers in research and dev. (per million people)	SP.POP.SCIE.RD	2016-07-01	201607	..	..	..	..	..	..
312	Estonia	EST	Pupil-teacher ratio, tertiary	SE.TER.ENRL.TC.ZS	2016-07-01	201607	..	..	..	..	..	..
313	Europe & Central Asia (all income levels)	ECS	Technicians in R&D (per million people)	SP.POP.TECH.RD.P6	2016-07-01	201607	800.759	874.482	866.651	..	..	..
314	Europe & Central Asia (all income levels)	ECS	Technicians in research and development (per million people)	SP.POP.TECH.RD	2016-07-01	201607	..	..	..	..	..	..
315	Europe & Central Asia (all income levels)	ECS	Fixed broadband Internet subscribers (per 100 people)	IT.NET.BBND.P2	2016-07-01	201607	18.9603	20.3031	21.512	22.8029	23.6515	..
316	Europe & Central Asia (all income levels)	ECS	International Internet bandwidth (bits per second per Internet user)	IT.NET.BNDW.PC	2016-07-01	201607	..	..	..	..	..	..
317	Europe & Central Asia (all income levels)	ECS	International Internet bandwidth (Mbps)	IT.NET.BNDW	2016-07-01	201607	..	..	..	..	..	..
318	Europe & Central Asia (all income levels)	ECS	Internet hosts (per 10,000 people)	IT.NET.HOST.P4	2016-07-01	201607	..	..	..	..	..	..
319	Europe & Central Asia (all income levels)	ECS	Internet users (per 1,000 people)	IT.NET.USER.P3	2016-07-01	201607	..	..	..	..	..	..
320	Europe & Central Asia (all income levels)	ECS	Schools connected to the Internet (%)	IT.NET.EDUC.ZS	2016-07-01	201607	..	..	..	..	..	..
321	Europe & Central Asia (all income levels)	ECS	Secure Internet servers (per 1 million people)	IT.NET.SECR.P6	2016-07-01	201607	383.438	454.848	470.195	435.034	529.89	616.923
322	Europe & Central Asia (all income levels)	ECS	Information and communication technology expenditure per capita (current US$)	IE.ICT.PCAP.CD	2016-07-01	201607	..	..	..	..	..	..
323	Europe & Central Asia (all income levels)	ECS	Researchers in R&D (per million people)	SP.POP.SCIE.RD.P6	2016-07-01	201607	2791.61	2736.48	2888.23	2916.71	..	..
324	Europe & Central Asia (all income levels)	ECS	Scientists and engineers in research and dev. (per million people)	SP.POP.SCIE.RD	2016-07-01	201607	..	..	..	..	..	..
325	Europe & Central Asia (all income levels)	ECS	Pupil-teacher ratio, tertiary	SE.TER.ENRL.TC.ZS	2016-07-01	201607	..	..	..	..	..	..
326	European Union	EUU	Technicians in R&D (per million people)	SP.POP.TECH.RD.P6	2016-07-01	201607	1137.22	1286.77	1259.24	..	..	..
327	European Union	EUU	Technicians in research and development (per million people)	SP.POP.TECH.RD	2016-07-01	201607	..	..	..	..	..	..
328	European Union	EUU	Fixed broadband Internet subscribers (per 100 people)	IT.NET.BBND.P2	2016-07-01	201607	26.25	27.742	28.6966	29.849	30.879	..
329	European Union	EUU	International Internet bandwidth (bits per second per Internet user)	IT.NET.BNDW.PC	2016-07-01	201607	..	..	..	..	..	..
330	European Union	EUU	International Internet bandwidth (Mbps)	IT.NET.BNDW	2016-07-01	201607	..	..	..	..	..	..
331	European Union	EUU	Internet hosts (per 10,000 people)	IT.NET.HOST.P4	2016-07-01	201607	..	..	..	..	..	..
332	European Union	EUU	Internet users (per 1,000 people)	IT.NET.USER.P3	2016-07-01	201607	..	..	..	..	..	..
333	European Union	EUU	Schools connected to the Internet (%)	IT.NET.EDUC.ZS	2016-07-01	201607	..	..	..	..	..	..
334	European Union	EUU	Secure Internet servers (per 1 million people)	IT.NET.SECR.P6	2016-07-01	201607	604.426	715.681	742.388	687.185	832.034	965.338
335	European Union	EUU	Information and communication technology expenditure per capita (current US$)	IE.ICT.PCAP.CD	2016-07-01	201607	..	..	..	..	..	..
336	European Union	EUU	Researchers in R&D (per million people)	SP.POP.SCIE.RD.P6	2016-07-01	201607	3221.52	3236.38	3336.22	3429.53	..	..
337	European Union	EUU	Scientists and engineers in research and dev. (per million people)	SP.POP.SCIE.RD	2016-07-01	201607	..	..	..	..	..	..
338	European Union	EUU	Pupil-teacher ratio, tertiary	SE.TER.ENRL.TC.ZS	2016-07-01	201607	..	..	..	..	..	..
339	Fiji	FJI	Technicians in R&D (per million people)	SP.POP.TECH.RD.P6	2016-07-01	201607	..	..	..	..	..	..
340	Fiji	FJI	Technicians in research and development (per million people)	SP.POP.TECH.RD	2016-07-01	201607	..	..	..	..	..	..
341	Fiji	FJI	Fixed broadband Internet subscribers (per 100 people)	IT.NET.BBND.P2	2016-07-01	201607	2.70173	2.67882	1.54514	1.2402	1.40097	..
342	Fiji	FJI	International Internet bandwidth (bits per second per Internet user)	IT.NET.BNDW.PC	2016-07-01	201607	..	..	..	..	..	..
343	Fiji	FJI	International Internet bandwidth (Mbps)	IT.NET.BNDW	2016-07-01	201607	..	..	..	..	..	..
344	Fiji	FJI	Internet hosts (per 10,000 people)	IT.NET.HOST.P4	2016-07-01	201607	..	..	..	..	..	..
345	Fiji	FJI	Internet users (per 1,000 people)	IT.NET.USER.P3	2016-07-01	201607	..	..	..	..	..	..
346	Fiji	FJI	Schools connected to the Internet (%)	IT.NET.EDUC.ZS	2016-07-01	201607	..	..	..	..	..	..
347	Fiji	FJI	Secure Internet servers (per 1 million people)	IT.NET.SECR.P6	2016-07-01	201607	30.2342	36.895	35.4627	30.6648	41.7395	51.5611
348	Fiji	FJI	Information and communication technology expenditure per capita (current US$)	IE.ICT.PCAP.CD	2016-07-01	201607	..	..	..	..	..	..
349	Fiji	FJI	Researchers in R&D (per million people)	SP.POP.SCIE.RD.P6	2016-07-01	201607	..	..	..	..	..	..
350	Fiji	FJI	Scientists and engineers in research and dev. (per million people)	SP.POP.SCIE.RD	2016-07-01	201607	..	..	..	..	..	..
351	Fiji	FJI	Pupil-teacher ratio, tertiary	SE.TER.ENRL.TC.ZS	2016-07-01	201607	..	..	..	..	..	..
352	French Guiana	GUF	Technicians in R&D (per million people)	SP.POP.TECH.RD.P6	2016-07-01	201607	..	..	..	..	..	..
353	French Guiana	GUF	Technicians in research and development (per million people)	SP.POP.TECH.RD	2016-07-01	201607	..	..	..	..	..	..
354	French Guiana	GUF	Fixed broadband Internet subscribers (per 100 people)	IT.NET.BBND.P2	2016-07-01	201607	..	..	..	..	..	..
355	French Guiana	GUF	International Internet bandwidth (bits per second per Internet user)	IT.NET.BNDW.PC	2016-07-01	201607	..	..	..	..	..	..
356	French Guiana	GUF	International Internet bandwidth (Mbps)	IT.NET.BNDW	2016-07-01	201607	..	..	..	..	..	..
357	French Guiana	GUF	Internet hosts (per 10,000 people)	IT.NET.HOST.P4	2016-07-01	201607	..	..	..	..	..	..
358	French Guiana	GUF	Internet users (per 1,000 people)	IT.NET.USER.P3	2016-07-01	201607	..	..	..	..	..	..
359	French Guiana	GUF	Schools connected to the Internet (%)	IT.NET.EDUC.ZS	2016-07-01	201607	..	..	..	..	..	..
360	French Guiana	GUF	Secure Internet servers (per 1 million people)	IT.NET.SECR.P6	2016-07-01	201607	..	..	..	..	..	..
361	French Guiana	GUF	Information and communication technology expenditure per capita (current US$)	IE.ICT.PCAP.CD	2016-07-01	201607	..	..	..	..	..	..
362	French Guiana	GUF	Researchers in R&D (per million people)	SP.POP.SCIE.RD.P6	2016-07-01	201607	..	..	..	..	..	..
363	French Guiana	GUF	Scientists and engineers in research and dev. (per million people)	SP.POP.SCIE.RD	2016-07-01	201607	..	..	..	..	..	..
364	French Guiana	GUF	Pupil-teacher ratio, tertiary	SE.TER.ENRL.TC.ZS	2016-07-01	201607	..	..	..	..	..	..
365	Gabon	GAB	Technicians in R&D (per million people)	SP.POP.TECH.RD.P6	2016-07-01	201607	..	..	..	..	..	..
366	Gabon	GAB	Technicians in research and development (per million people)	SP.POP.TECH.RD	2016-07-01	201607	..	..	..	..	..	..
367	Gabon	GAB	Fixed broadband Internet subscribers (per 100 people)	IT.NET.BBND.P2	2016-07-01	201607	0.262302	0.282303	0.306265	0.532389	0.631101	..
368	Gabon	GAB	International Internet bandwidth (bits per second per Internet user)	IT.NET.BNDW.PC	2016-07-01	201607	..	..	..	..	..	..
369	Gabon	GAB	International Internet bandwidth (Mbps)	IT.NET.BNDW	2016-07-01	201607	..	..	..	..	..	..
370	Gabon	GAB	Internet hosts (per 10,000 people)	IT.NET.HOST.P4	2016-07-01	201607	..	..	..	..	..	..
371	Gabon	GAB	Internet users (per 1,000 people)	IT.NET.USER.P3	2016-07-01	201607	..	..	..	..	..	..
372	Gabon	GAB	Schools connected to the Internet (%)	IT.NET.EDUC.ZS	2016-07-01	201607	..	..	..	..	..	..
373	Gabon	GAB	Secure Internet servers (per 1 million people)	IT.NET.SECR.P6	2016-07-01	201607	7.78242	8.24194	11.1559	9.69491	10.6656	9.8534
374	Gabon	GAB	Information and communication technology expenditure per capita (current US$)	IE.ICT.PCAP.CD	2016-07-01	201607	..	..	..	..	..	..
375	Gabon	GAB	Researchers in R&D (per million people)	SP.POP.SCIE.RD.P6	2016-07-01	201607	..	..	..	..	..	..
376	Gabon	GAB	Scientists and engineers in research and dev. (per million people)	SP.POP.SCIE.RD	2016-07-01	201607	..	..	..	..	..	..
377	Gabon	GAB	Pupil-teacher ratio, tertiary	SE.TER.ENRL.TC.ZS	2016-07-01	201607	..	..	..	..	..	..
378	Ghana	GHA	Technicians in R&D (per million people)	SP.POP.TECH.RD.P6	2016-07-01	201607	30.0768	..	..	..	..	..
379	Ghana	GHA	Technicians in research and development (per million people)	SP.POP.TECH.RD	2016-07-01	201607	..	..	..	..	..	..
380	Ghana	GHA	Fixed broadband Internet subscribers (per 100 people)	IT.NET.BBND.P2	2016-07-01	201607	0.214669	0.262478	0.268591	0.265571	0.265371	..
381	Ghana	GHA	International Internet bandwidth (bits per second per Internet user)	IT.NET.BNDW.PC	2016-07-01	201607	..	..	..	..	..	..
382	Ghana	GHA	International Internet bandwidth (Mbps)	IT.NET.BNDW	2016-07-01	201607	..	..	..	..	..	..
383	Ghana	GHA	Internet hosts (per 10,000 people)	IT.NET.HOST.P4	2016-07-01	201607	..	..	..	..	..	..
384	Ghana	GHA	Internet users (per 1,000 people)	IT.NET.USER.P3	2016-07-01	201607	..	..	..	..	..	..
385	Ghana	GHA	Schools connected to the Internet (%)	IT.NET.EDUC.ZS	2016-07-01	201607	..	..	..	..	..	..
386	Ghana	GHA	Secure Internet servers (per 1 million people)	IT.NET.SECR.P6	2016-07-01	201607	1.72713	2.20631	2.93605	2.59895	3.69588	4.9982
387	Ghana	GHA	Information and communication technology expenditure per capita (current US$)	IE.ICT.PCAP.CD	2016-07-01	201607	..	..	..	..	..	..
388	Ghana	GHA	Researchers in R&D (per million people)	SP.POP.SCIE.RD.P6	2016-07-01	201607	38.6796	..	..	..	..	..
389	Ghana	GHA	Scientists and engineers in research and dev. (per million people)	SP.POP.SCIE.RD	2016-07-01	201607	..	..	..	..	..	..
390	Ghana	GHA	Pupil-teacher ratio, tertiary	SE.TER.ENRL.TC.ZS	2016-07-01	201607	..	..	29.4961	26.9496	29.6128	..
391	Greece	GRC	Technicians in R&D (per million people)	SP.POP.TECH.RD.P6	2016-07-01	201607	..	568.102	..	..	..	..
392	Greece	GRC	Technicians in research and development (per million people)	SP.POP.TECH.RD	2016-07-01	201607	..	..	..	..	..	..
393	Greece	GRC	Fixed broadband Internet subscribers (per 100 people)	IT.NET.BBND.P2	2016-07-01	201607	20.2759	22.1637	24.1754	26.179	28.3605	..
394	Greece	GRC	International Internet bandwidth (bits per second per Internet user)	IT.NET.BNDW.PC	2016-07-01	201607	..	..	..	..	..	..
395	Greece	GRC	International Internet bandwidth (Mbps)	IT.NET.BNDW	2016-07-01	201607	..	..	..	..	..	..
396	Greece	GRC	Internet hosts (per 10,000 people)	IT.NET.HOST.P4	2016-07-01	201607	..	..	..	..	..	..
397	Greece	GRC	Internet users (per 1,000 people)	IT.NET.USER.P3	2016-07-01	201607	..	..	..	..	..	..
398	Greece	GRC	Schools connected to the Internet (%)	IT.NET.EDUC.ZS	2016-07-01	201607	..	..	..	..	..	..
399	Greece	GRC	Secure Internet servers (per 1 million people)	IT.NET.SECR.P6	2016-07-01	201607	126.424	157.138	171.933	137.07	148.268	191.986
400	Greece	GRC	Information and communication technology expenditure per capita (current US$)	IE.ICT.PCAP.CD	2016-07-01	201607	..	..	..	..	..	..
401	Greece	GRC	Researchers in R&D (per million people)	SP.POP.SCIE.RD.P6	2016-07-01	201607	..	2212.33	2232.29	2628.16	..	..
402	Greece	GRC	Scientists and engineers in research and dev. (per million people)	SP.POP.SCIE.RD	2016-07-01	201607	..	..	..	..	..	..
403	Greece	GRC	Pupil-teacher ratio, tertiary	SE.TER.ENRL.TC.ZS	2016-07-01	201607	..	..	..	..	..	..
404	Guinea	GIN	Technicians in R&D (per million people)	SP.POP.TECH.RD.P6	2016-07-01	201607	..	..	..	..	..	..
405	Guinea	GIN	Technicians in research and development (per million people)	SP.POP.TECH.RD	2016-07-01	201607	..	..	..	..	..	..
406	Guinea	GIN	Fixed broadband Internet subscribers (per 100 people)	IT.NET.BBND.P2	2016-07-01	201607	0.00459726	0.00537561	0.00611286	0.0068113	0.00747266	..
407	Guinea	GIN	International Internet bandwidth (bits per second per Internet user)	IT.NET.BNDW.PC	2016-07-01	201607	..	..	..	..	..	..
408	Guinea	GIN	International Internet bandwidth (Mbps)	IT.NET.BNDW	2016-07-01	201607	..	..	..	..	..	..
409	Guinea	GIN	Internet hosts (per 10,000 people)	IT.NET.HOST.P4	2016-07-01	201607	..	..	..	..	..	..
410	Guinea	GIN	Internet users (per 1,000 people)	IT.NET.USER.P3	2016-07-01	201607	..	..	..	..	..	..
411	Guinea	GIN	Schools connected to the Internet (%)	IT.NET.EDUC.ZS	2016-07-01	201607	..	..	..	..	..	..
412	Guinea	GIN	Secure Internet servers (per 1 million people)	IT.NET.SECR.P6	2016-07-01	201607	0.363227	0.441839	0.429968	0.0836909	0.325852	0.475866
413	Guinea	GIN	Information and communication technology expenditure per capita (current US$)	IE.ICT.PCAP.CD	2016-07-01	201607	..	..	..	..	..	..
414	Guinea	GIN	Researchers in R&D (per million people)	SP.POP.SCIE.RD.P6	2016-07-01	201607	..	..	..	..	..	..
415	Guinea	GIN	Scientists and engineers in research and dev. (per million people)	SP.POP.SCIE.RD	2016-07-01	201607	..	..	..	..	..	..
416	Guinea	GIN	Pupil-teacher ratio, tertiary	SE.TER.ENRL.TC.ZS	2016-07-01	201607	19.0983	17.9153	..	17.0012	18.7003	..
417	Guyana	GUY	Technicians in R&D (per million people)	SP.POP.TECH.RD.P6	2016-07-01	201607	..	..	..	..	..	..
418	Guyana	GUY	Technicians in research and development (per million people)	SP.POP.TECH.RD	2016-07-01	201607	..	..	..	..	..	..
419	Guyana	GUY	Fixed broadband Internet subscribers (per 100 people)	IT.NET.BBND.P2	2016-07-01	201607	1.42382	2.5971	3.76945	4.61473	5.62726	..
420	Guyana	GUY	International Internet bandwidth (bits per second per Internet user)	IT.NET.BNDW.PC	2016-07-01	201607	..	..	..	..	..	..
421	Guyana	GUY	International Internet bandwidth (Mbps)	IT.NET.BNDW	2016-07-01	201607	..	..	..	..	..	..
422	Guyana	GUY	Internet hosts (per 10,000 people)	IT.NET.HOST.P4	2016-07-01	201607	..	..	..	..	..	..
423	Guyana	GUY	Internet users (per 1,000 people)	IT.NET.USER.P3	2016-07-01	201607	..	..	..	..	..	..
424	Guyana	GUY	Schools connected to the Internet (%)	IT.NET.EDUC.ZS	2016-07-01	201607	..	..	..	..	..	..
425	Guyana	GUY	Secure Internet servers (per 1 million people)	IT.NET.SECR.P6	2016-07-01	201607	6.63692	9.26069	6.59274	13.14	10.4727	16.9473
426	Guyana	GUY	Information and communication technology expenditure per capita (current US$)	IE.ICT.PCAP.CD	2016-07-01	201607	..	..	..	..	..	..
427	Guyana	GUY	Researchers in R&D (per million people)	SP.POP.SCIE.RD.P6	2016-07-01	201607	..	..	..	..	..	..
428	Guyana	GUY	Scientists and engineers in research and dev. (per million people)	SP.POP.SCIE.RD	2016-07-01	201607	..	..	..	..	..	..
429	Guyana	GUY	Pupil-teacher ratio, tertiary	SE.TER.ENRL.TC.ZS	2016-07-01	201607	10.5572	13.4734	13.1021	..	..	..
430	Honduras	HND	Technicians in R&D (per million people)	SP.POP.TECH.RD.P6	2016-07-01	201607	..	..	..	..	..	..
431	Honduras	HND	Technicians in research and development (per million people)	SP.POP.TECH.RD	2016-07-01	201607	..	..	..	..	..	..
432	Honduras	HND	Fixed broadband Internet subscribers (per 100 people)	IT.NET.BBND.P2	2016-07-01	201607	0.0131213	0.736691	0.772155	0.851984	1.38587	..
433	Honduras	HND	International Internet bandwidth (bits per second per Internet user)	IT.NET.BNDW.PC	2016-07-01	201607	..	..	..	..	..	..
434	Honduras	HND	International Internet bandwidth (Mbps)	IT.NET.BNDW	2016-07-01	201607	..	..	..	..	..	..
435	Honduras	HND	Internet hosts (per 10,000 people)	IT.NET.HOST.P4	2016-07-01	201607	..	..	..	..	..	..
436	Honduras	HND	Internet users (per 1,000 people)	IT.NET.USER.P3	2016-07-01	201607	..	..	..	..	..	..
437	Honduras	HND	Schools connected to the Internet (%)	IT.NET.EDUC.ZS	2016-07-01	201607	..	..	..	..	..	..
438	Honduras	HND	Secure Internet servers (per 1 million people)	IT.NET.SECR.P6	2016-07-01	201607	8.39566	7.87255	9.69477	9.42788	11.4297	13.1268
439	Honduras	HND	Information and communication technology expenditure per capita (current US$)	IE.ICT.PCAP.CD	2016-07-01	201607	..	..	..	..	..	..
440	Honduras	HND	Researchers in R&D (per million people)	SP.POP.SCIE.RD.P6	2016-07-01	201607	..	..	..	..	..	..
441	Honduras	HND	Scientists and engineers in research and dev. (per million people)	SP.POP.SCIE.RD	2016-07-01	201607	..	..	..	..	..	..
442	Honduras	HND	Pupil-teacher ratio, tertiary	SE.TER.ENRL.TC.ZS	2016-07-01	201607	19.7693	..	19.3512	21.4078	19.9331	..
443	Hungary	HUN	Technicians in R&D (per million people)	SP.POP.TECH.RD.P6	2016-07-01	201607	595.828	651.326	702.226	780.694	..	..
444	Hungary	HUN	Technicians in research and development (per million people)	SP.POP.TECH.RD	2016-07-01	201607	..	..	..	..	..	..
445	Hungary	HUN	Fixed broadband Internet subscribers (per 100 people)	IT.NET.BBND.P2	2016-07-01	201607	21.5627	23.1397	24.0175	26.0891	27.3467	..
446	Hungary	HUN	International Internet bandwidth (bits per second per Internet user)	IT.NET.BNDW.PC	2016-07-01	201607	..	..	..	..	..	..
447	Hungary	HUN	International Internet bandwidth (Mbps)	IT.NET.BNDW	2016-07-01	201607	..	..	..	..	..	..
448	Hungary	HUN	Internet hosts (per 10,000 people)	IT.NET.HOST.P4	2016-07-01	201607	..	..	..	..	..	..
449	Hungary	HUN	Internet users (per 1,000 people)	IT.NET.USER.P3	2016-07-01	201607	..	..	..	..	..	..
450	Hungary	HUN	Schools connected to the Internet (%)	IT.NET.EDUC.ZS	2016-07-01	201607	..	..	..	..	..	..
451	Hungary	HUN	Secure Internet servers (per 1 million people)	IT.NET.SECR.P6	2016-07-01	201607	166.2	219.922	247.773	249.568	300.614	366.289
452	Hungary	HUN	Information and communication technology expenditure per capita (current US$)	IE.ICT.PCAP.CD	2016-07-01	201607	..	..	..	..	..	..
453	Hungary	HUN	Researchers in R&D (per million people)	SP.POP.SCIE.RD.P6	2016-07-01	201607	2131.08	2304.47	2393.67	2522.85	..	..
454	Hungary	HUN	Scientists and engineers in research and dev. (per million people)	SP.POP.SCIE.RD	2016-07-01	201607	..	..	..	..	..	..
455	Hungary	HUN	Pupil-teacher ratio, tertiary	SE.TER.ENRL.TC.ZS	2016-07-01	201607	15.8135	16.8272	15.6826	15.166	..	..
456	Iceland	ISL	Technicians in R&D (per million people)	SP.POP.TECH.RD.P6	2016-07-01	201607	..	1882.38	..	..	..	..
457	Iceland	ISL	Technicians in research and development (per million people)	SP.POP.TECH.RD	2016-07-01	201607	..	..	..	..	..	..
458	Iceland	ISL	Fixed broadband Internet subscribers (per 100 people)	IT.NET.BBND.P2	2016-07-01	201607	34.3389	34.6478	34.8056	35.6463	35.9155	..
459	Iceland	ISL	International Internet bandwidth (bits per second per Internet user)	IT.NET.BNDW.PC	2016-07-01	201607	..	..	..	..	..	..
460	Iceland	ISL	International Internet bandwidth (Mbps)	IT.NET.BNDW	2016-07-01	201607	..	..	..	..	..	..
461	Iceland	ISL	Internet hosts (per 10,000 people)	IT.NET.HOST.P4	2016-07-01	201607	..	..	..	..	..	..
462	Iceland	ISL	Internet users (per 1,000 people)	IT.NET.USER.P3	2016-07-01	201607	..	..	..	..	..	..
463	Iceland	ISL	Schools connected to the Internet (%)	IT.NET.EDUC.ZS	2016-07-01	201607	..	..	..	..	..	..
464	Iceland	ISL	Secure Internet servers (per 1 million people)	IT.NET.SECR.P6	2016-07-01	201607	2524.83	3024.95	3133.61	2915.7	3216.39	3406.66
465	Iceland	ISL	Information and communication technology expenditure per capita (current US$)	IE.ICT.PCAP.CD	2016-07-01	201607	..	..	..	..	..	..
466	Iceland	ISL	Researchers in R&D (per million people)	SP.POP.SCIE.RD.P6	2016-07-01	201607	..	7034.55	..	..	..	..
467	Iceland	ISL	Scientists and engineers in research and dev. (per million people)	SP.POP.SCIE.RD	2016-07-01	201607	..	..	..	..	..	..
468	Iceland	ISL	Pupil-teacher ratio, tertiary	SE.TER.ENRL.TC.ZS	2016-07-01	201607	8.57123	8.87659	8.71305	..	..	..
469	Indonesia	IDN	Technicians in R&D (per million people)	SP.POP.TECH.RD.P6	2016-07-01	201607	..	..	..	..	..	..
470	Indonesia	IDN	Technicians in research and development (per million people)	SP.POP.TECH.RD	2016-07-01	201607	..	..	..	..	..	..
471	Indonesia	IDN	Fixed broadband Internet subscribers (per 100 people)	IT.NET.BBND.P2	2016-07-01	201607	0.947461	1.12238	1.20836	1.30142	1.19028	..
472	Indonesia	IDN	International Internet bandwidth (bits per second per Internet user)	IT.NET.BNDW.PC	2016-07-01	201607	..	..	..	..	..	..
473	Indonesia	IDN	International Internet bandwidth (Mbps)	IT.NET.BNDW	2016-07-01	201607	..	..	..	..	..	..
474	Indonesia	IDN	Internet hosts (per 10,000 people)	IT.NET.HOST.P4	2016-07-01	201607	..	..	..	..	..	..
475	Indonesia	IDN	Internet users (per 1,000 people)	IT.NET.USER.P3	2016-07-01	201607	..	..	..	..	..	..
476	Indonesia	IDN	Schools connected to the Internet (%)	IT.NET.EDUC.ZS	2016-07-01	201607	..	..	..	..	..	..
477	Indonesia	IDN	Secure Internet servers (per 1 million people)	IT.NET.SECR.P6	2016-07-01	201607	1.98665	3.34956	3.93085	4.09522	6.23293	7.95919
478	Indonesia	IDN	Information and communication technology expenditure per capita (current US$)	IE.ICT.PCAP.CD	2016-07-01	201607	..	..	..	..	..	..
479	Indonesia	IDN	Researchers in R&D (per million people)	SP.POP.SCIE.RD.P6	2016-07-01	201607	..	..	..	..	..	..
480	Indonesia	IDN	Scientists and engineers in research and dev. (per million people)	SP.POP.SCIE.RD	2016-07-01	201607	..	..	..	..	..	..
481	Indonesia	IDN	Pupil-teacher ratio, tertiary	SE.TER.ENRL.TC.ZS	2016-07-01	201607	18.4495	22.4789	27.5306	27.044	..	..
482	Italy	ITA	Technicians in R&D (per million people)	SP.POP.TECH.RD.P6	2016-07-01	201607	..	..	..	..	..	..
483	Italy	ITA	Technicians in research and development (per million people)	SP.POP.TECH.RD	2016-07-01	201607	..	..	..	..	..	..
484	Italy	ITA	Fixed broadband Internet subscribers (per 100 people)	IT.NET.BBND.P2	2016-07-01	201607	21.6464	22.2606	22.6057	22.9758	23.5366	..
485	Italy	ITA	International Internet bandwidth (bits per second per Internet user)	IT.NET.BNDW.PC	2016-07-01	201607	..	..	..	..	..	..
486	Italy	ITA	International Internet bandwidth (Mbps)	IT.NET.BNDW	2016-07-01	201607	..	..	..	..	..	..
487	Italy	ITA	Internet hosts (per 10,000 people)	IT.NET.HOST.P4	2016-07-01	201607	..	..	..	..	..	..
488	Italy	ITA	Internet users (per 1,000 people)	IT.NET.USER.P3	2016-07-01	201607	..	..	..	..	..	..
489	Italy	ITA	Schools connected to the Internet (%)	IT.NET.EDUC.ZS	2016-07-01	201607	..	..	..	..	..	..
490	Italy	ITA	Secure Internet servers (per 1 million people)	IT.NET.SECR.P6	2016-07-01	201607	157.564	195.337	212.883	201.863	251.443	288.543
491	Italy	ITA	Information and communication technology expenditure per capita (current US$)	IE.ICT.PCAP.CD	2016-07-01	201607	..	..	..	..	..	..
492	Italy	ITA	Researchers in R&D (per million people)	SP.POP.SCIE.RD.P6	2016-07-01	201607	1735.66	1778.7	1853.01	1973.75	..	..
493	Italy	ITA	Scientists and engineers in research and dev. (per million people)	SP.POP.SCIE.RD	2016-07-01	201607	..	..	..	..	..	..
494	Italy	ITA	Pupil-teacher ratio, tertiary	SE.TER.ENRL.TC.ZS	2016-07-01	201607	18.6621	19.0162	19.4105	19.0274	..	..
495	Japan	JPN	Technicians in R&D (per million people)	SP.POP.TECH.RD.P6	2016-07-01	201607	587.945	564.608	517.761	519.219	..	..
496	Japan	JPN	Technicians in research and development (per million people)	SP.POP.TECH.RD	2016-07-01	201607	..	..	..	..	..	..
497	Japan	JPN	Fixed broadband Internet subscribers (per 100 people)	IT.NET.BBND.P2	2016-07-01	201607	26.7774	28.0368	28.3949	28.8845	29.3108	..
498	Japan	JPN	International Internet bandwidth (bits per second per Internet user)	IT.NET.BNDW.PC	2016-07-01	201607	..	..	..	..	..	..
499	Japan	JPN	International Internet bandwidth (Mbps)	IT.NET.BNDW	2016-07-01	201607	..	..	..	..	..	..
500	Japan	JPN	Internet hosts (per 10,000 people)	IT.NET.HOST.P4	2016-07-01	201607	..	..	..	..	..	..
501	Japan	JPN	Internet users (per 1,000 people)	IT.NET.USER.P3	2016-07-01	201607	..	..	..	..	..	..
502	Japan	JPN	Schools connected to the Internet (%)	IT.NET.EDUC.ZS	2016-07-01	201607	..	..	..	..	..	..
503	Japan	JPN	Secure Internet servers (per 1 million people)	IT.NET.SECR.P6	2016-07-01	201607	646.701	743.929	750.046	736.666	911.684	971.018
504	Japan	JPN	Information and communication technology expenditure per capita (current US$)	IE.ICT.PCAP.CD	2016-07-01	201607	..	..	..	..	..	..
505	Japan	JPN	Researchers in R&D (per million people)	SP.POP.SCIE.RD.P6	2016-07-01	201607	5152.63	5160.2	5083.75	5201.32	..	..
506	Japan	JPN	Scientists and engineers in research and dev. (per million people)	SP.POP.SCIE.RD	2016-07-01	201607	..	..	..	..	..	..
507	Japan	JPN	Pupil-teacher ratio, tertiary	SE.TER.ENRL.TC.ZS	2016-07-01	201607	7.26643	7.29744	7.23729	7.12377	..	..
508	Latin America & Caribbean (all income levels)	LCN	Technicians in R&D (per million people)	SP.POP.TECH.RD.P6	2016-07-01	201607	395.594	..	..	..	..	..
509	Latin America & Caribbean (all income levels)	LCN	Technicians in research and development (per million people)	SP.POP.TECH.RD	2016-07-01	201607	..	..	..	..	..	..
510	Latin America & Caribbean (all income levels)	LCN	Fixed broadband Internet subscribers (per 100 people)	IT.NET.BBND.P2	2016-07-01	201607	6.69658	8.02205	8.64869	9.35522	9.83404	..
511	Latin America & Caribbean (all income levels)	LCN	International Internet bandwidth (bits per second per Internet user)	IT.NET.BNDW.PC	2016-07-01	201607	..	..	..	..	..	..
512	Latin America & Caribbean (all income levels)	LCN	International Internet bandwidth (Mbps)	IT.NET.BNDW	2016-07-01	201607	..	..	..	..	..	..
513	Latin America & Caribbean (all income levels)	LCN	Internet hosts (per 10,000 people)	IT.NET.HOST.P4	2016-07-01	201607	..	..	..	..	..	..
514	Latin America & Caribbean (all income levels)	LCN	Internet users (per 1,000 people)	IT.NET.USER.P3	2016-07-01	201607	..	..	..	..	..	..
515	Latin America & Caribbean (all income levels)	LCN	Schools connected to the Internet (%)	IT.NET.EDUC.ZS	2016-07-01	201607	..	..	..	..	..	..
516	Latin America & Caribbean (all income levels)	LCN	Secure Internet servers (per 1 million people)	IT.NET.SECR.P6	2016-07-01	201607	28.3036	36.9261	38.5201	39.5766	49.4003	56.6214
517	Latin America & Caribbean (all income levels)	LCN	Information and communication technology expenditure per capita (current US$)	IE.ICT.PCAP.CD	2016-07-01	201607	..	..	..	..	..	..
518	Latin America & Caribbean (all income levels)	LCN	Researchers in R&D (per million people)	SP.POP.SCIE.RD.P6	2016-07-01	201607	524.396	..	..	..	..	..
519	Latin America & Caribbean (all income levels)	LCN	Scientists and engineers in research and dev. (per million people)	SP.POP.SCIE.RD	2016-07-01	201607	..	..	..	..	..	..
520	Latin America & Caribbean (all income levels)	LCN	Pupil-teacher ratio, tertiary	SE.TER.ENRL.TC.ZS	2016-07-01	201607	..	..	..	..	..	..
521	Liberia	LBR	Technicians in R&D (per million people)	SP.POP.TECH.RD.P6	2016-07-01	201607	..	..	..	..	..	..
522	Liberia	LBR	Technicians in research and development (per million people)	SP.POP.TECH.RD	2016-07-01	201607	..	..	..	..	..	..
523	Liberia	LBR	Fixed broadband Internet subscribers (per 100 people)	IT.NET.BBND.P2	2016-07-01	201607	0.00469935	0.00154423	0.0125047	0.118302	0.136461	..
524	Liberia	LBR	International Internet bandwidth (bits per second per Internet user)	IT.NET.BNDW.PC	2016-07-01	201607	..	..	..	..	..	..
525	Liberia	LBR	International Internet bandwidth (Mbps)	IT.NET.BNDW	2016-07-01	201607	..	..	..	..	..	..
526	Liberia	LBR	Internet hosts (per 10,000 people)	IT.NET.HOST.P4	2016-07-01	201607	..	..	..	..	..	..
527	Liberia	LBR	Internet users (per 1,000 people)	IT.NET.USER.P3	2016-07-01	201607	..	..	..	..	..	..
528	Liberia	LBR	Schools connected to the Internet (%)	IT.NET.EDUC.ZS	2016-07-01	201607	..	..	..	..	..	..
529	Liberia	LBR	Secure Internet servers (per 1 million people)	IT.NET.SECR.P6	2016-07-01	201607	0.75796	1.22562	1.19327	0.931599	2.50196	3.55284
530	Liberia	LBR	Information and communication technology expenditure per capita (current US$)	IE.ICT.PCAP.CD	2016-07-01	201607	..	..	..	..	..	..
531	Liberia	LBR	Researchers in R&D (per million people)	SP.POP.SCIE.RD.P6	2016-07-01	201607	..	..	..	..	..	..
532	Liberia	LBR	Scientists and engineers in research and dev. (per million people)	SP.POP.SCIE.RD	2016-07-01	201607	..	..	..	..	..	..
533	Liberia	LBR	Pupil-teacher ratio, tertiary	SE.TER.ENRL.TC.ZS	2016-07-01	201607	24.4307	..	21.6386	..	..	..
534	Liechtenstein	LIE	Technicians in R&D (per million people)	SP.POP.TECH.RD.P6	2016-07-01	201607	..	..	..	..	..	..
535	Liechtenstein	LIE	Technicians in research and development (per million people)	SP.POP.TECH.RD	2016-07-01	201607	..	..	..	..	..	..
536	Liechtenstein	LIE	Fixed broadband Internet subscribers (per 100 people)	IT.NET.BBND.P2	2016-07-01	201607	42.2204	37.3612	39.3278	40.6662	41.9691	..
537	Liechtenstein	LIE	International Internet bandwidth (bits per second per Internet user)	IT.NET.BNDW.PC	2016-07-01	201607	..	..	..	..	..	..
538	Liechtenstein	LIE	International Internet bandwidth (Mbps)	IT.NET.BNDW	2016-07-01	201607	..	..	..	..	..	..
539	Liechtenstein	LIE	Internet hosts (per 10,000 people)	IT.NET.HOST.P4	2016-07-01	201607	..	..	..	..	..	..
540	Liechtenstein	LIE	Internet users (per 1,000 people)	IT.NET.USER.P3	2016-07-01	201607	..	..	..	..	..	..
541	Liechtenstein	LIE	Schools connected to the Internet (%)	IT.NET.EDUC.ZS	2016-07-01	201607	..	..	..	..	..	..
542	Liechtenstein	LIE	Secure Internet servers (per 1 million people)	IT.NET.SECR.P6	2016-07-01	201607	5733.82	7636.09	..	8207.34	9762.38	10231.5
543	Liechtenstein	LIE	Information and communication technology expenditure per capita (current US$)	IE.ICT.PCAP.CD	2016-07-01	201607	..	..	..	..	..	..
544	Liechtenstein	LIE	Researchers in R&D (per million people)	SP.POP.SCIE.RD.P6	2016-07-01	201607	..	..	..	..	..	..
545	Liechtenstein	LIE	Scientists and engineers in research and dev. (per million people)	SP.POP.SCIE.RD	2016-07-01	201607	..	..	..	..	..	..
546	Liechtenstein	LIE	Pupil-teacher ratio, tertiary	SE.TER.ENRL.TC.ZS	2016-07-01	201607	..	9.02752	8.27586	..	..	..
547	Low & middle income	LMY	Technicians in R&D (per million people)	SP.POP.TECH.RD.P6	2016-07-01	201607	..	..	..	..	..	..
548	Low & middle income	LMY	Technicians in research and development (per million people)	SP.POP.TECH.RD	2016-07-01	201607	..	..	..	..	..	..
549	Low & middle income	LMY	Fixed broadband Internet subscribers (per 100 people)	IT.NET.BBND.P2	2016-07-01	201607	4.00074	5.18442	5.64463	6.08005	6.53315	..
550	Low & middle income	LMY	International Internet bandwidth (bits per second per Internet user)	IT.NET.BNDW.PC	2016-07-01	201607	..	..	..	..	..	..
551	Low & middle income	LMY	International Internet bandwidth (Mbps)	IT.NET.BNDW	2016-07-01	201607	..	..	..	..	..	..
552	Low & middle income	LMY	Internet hosts (per 10,000 people)	IT.NET.HOST.P4	2016-07-01	201607	..	..	..	..	..	..
553	Low & middle income	LMY	Internet users (per 1,000 people)	IT.NET.USER.P3	2016-07-01	201607	..	..	..	..	..	..
554	Low & middle income	LMY	Schools connected to the Internet (%)	IT.NET.EDUC.ZS	2016-07-01	201607	..	..	..	..	..	..
555	Low & middle income	LMY	Secure Internet servers (per 1 million people)	IT.NET.SECR.P6	2016-07-01	201607	7.12389	9.50396	10.3425	10.1116	14.1236	18.0096
556	Low & middle income	LMY	Information and communication technology expenditure per capita (current US$)	IE.ICT.PCAP.CD	2016-07-01	201607	..	..	..	..	..	..
557	Low & middle income	LMY	Researchers in R&D (per million people)	SP.POP.SCIE.RD.P6	2016-07-01	201607	614.462	..	..	..	..	..
558	Low & middle income	LMY	Scientists and engineers in research and dev. (per million people)	SP.POP.SCIE.RD	2016-07-01	201607	..	..	..	..	..	..
559	Low & middle income	LMY	Pupil-teacher ratio, tertiary	SE.TER.ENRL.TC.ZS	2016-07-01	201607	..	..	..	..	..	..
560	Macao SAR, China	MAC	Technicians in R&D (per million people)	SP.POP.TECH.RD.P6	2016-07-01	201607	585.456	671.323	652.607	744.645	..	..
561	Macao SAR, China	MAC	Technicians in research and development (per million people)	SP.POP.TECH.RD	2016-07-01	201607	..	..	..	..	..	..
562	Macao SAR, China	MAC	Fixed broadband Internet subscribers (per 100 people)	IT.NET.BBND.P2	2016-07-01	201607	24.7053	25.1998	25.9699	26.8013	28.0631	..
563	Macao SAR, China	MAC	International Internet bandwidth (bits per second per Internet user)	IT.NET.BNDW.PC	2016-07-01	201607	..	..	..	..	..	..
564	Macao SAR, China	MAC	International Internet bandwidth (Mbps)	IT.NET.BNDW	2016-07-01	201607	..	..	..	..	..	..
565	Macao SAR, China	MAC	Internet hosts (per 10,000 people)	IT.NET.HOST.P4	2016-07-01	201607	..	..	..	..	..	..
566	Macao SAR, China	MAC	Internet users (per 1,000 people)	IT.NET.USER.P3	2016-07-01	201607	..	..	..	..	..	..
567	Macao SAR, China	MAC	Schools connected to the Internet (%)	IT.NET.EDUC.ZS	2016-07-01	201607	..	..	..	..	..	..
568	Macao SAR, China	MAC	Secure Internet servers (per 1 million people)	IT.NET.SECR.P6	2016-07-01	201607	213.233	243.286	..	309.829	339.151	466.299
569	Macao SAR, China	MAC	Information and communication technology expenditure per capita (current US$)	IE.ICT.PCAP.CD	2016-07-01	201607	..	..	..	..	..	..
570	Macao SAR, China	MAC	Researchers in R&D (per million people)	SP.POP.SCIE.RD.P6	2016-07-01	201607	654.214	615.166	744.94	928.254	..	..
571	Macao SAR, China	MAC	Scientists and engineers in research and dev. (per million people)	SP.POP.SCIE.RD	2016-07-01	201607	..	..	..	..	..	..
572	Macao SAR, China	MAC	Pupil-teacher ratio, tertiary	SE.TER.ENRL.TC.ZS	2016-07-01	201607	14.3645	16.5864	14.05	13.0834	13.3398	..
573	Madagascar	MDG	Technicians in R&D (per million people)	SP.POP.TECH.RD.P6	2016-07-01	201607	15.4652	16.5599	..	..	..	..
574	Madagascar	MDG	Technicians in research and development (per million people)	SP.POP.TECH.RD	2016-07-01	201607	..	..	..	..	..	..
575	Madagascar	MDG	Fixed broadband Internet subscribers (per 100 people)	IT.NET.BBND.P2	2016-07-01	201607	0.0255746	0.0316067	0.139397	0.165707	0.105358	..
576	Madagascar	MDG	International Internet bandwidth (bits per second per Internet user)	IT.NET.BNDW.PC	2016-07-01	201607	..	..	..	..	..	..
577	Madagascar	MDG	International Internet bandwidth (Mbps)	IT.NET.BNDW	2016-07-01	201607	..	..	..	..	..	..
578	Madagascar	MDG	Internet hosts (per 10,000 people)	IT.NET.HOST.P4	2016-07-01	201607	..	..	..	..	..	..
579	Madagascar	MDG	Internet users (per 1,000 people)	IT.NET.USER.P3	2016-07-01	201607	..	..	..	..	..	..
580	Madagascar	MDG	Schools connected to the Internet (%)	IT.NET.EDUC.ZS	2016-07-01	201607	..	..	..	..	..	..
581	Madagascar	MDG	Secure Internet servers (per 1 million people)	IT.NET.SECR.P6	2016-07-01	201607	0.474394	0.507407	0.538268	0.65432	0.933322	1.65048
582	Madagascar	MDG	Information and communication technology expenditure per capita (current US$)	IE.ICT.PCAP.CD	2016-07-01	201607	..	..	..	..	..	..
583	Madagascar	MDG	Researchers in R&D (per million people)	SP.POP.SCIE.RD.P6	2016-07-01	201607	52.1359	51.0174	..	..	..	..
584	Madagascar	MDG	Scientists and engineers in research and dev. (per million people)	SP.POP.SCIE.RD	2016-07-01	201607	..	..	..	..	..	..
585	Madagascar	MDG	Pupil-teacher ratio, tertiary	SE.TER.ENRL.TC.ZS	2016-07-01	201607	16.5652	18.5691	20.3278	19.0642	..	..
586	Malaysia	MYS	Technicians in R&D (per million people)	SP.POP.TECH.RD.P6	2016-07-01	201607	130.714	159.203	163.105	..	..	..
587	Malaysia	MYS	Technicians in research and development (per million people)	SP.POP.TECH.RD	2016-07-01	201607	..	..	..	..	..	..
588	Malaysia	MYS	Fixed broadband Internet subscribers (per 100 people)	IT.NET.BBND.P2	2016-07-01	201607	7.41906	8.71624	9.98942	9.8893	10.1398	..
589	Malaysia	MYS	International Internet bandwidth (bits per second per Internet user)	IT.NET.BNDW.PC	2016-07-01	201607	..	..	..	..	..	..
590	Malaysia	MYS	International Internet bandwidth (Mbps)	IT.NET.BNDW	2016-07-01	201607	..	..	..	..	..	..
591	Malaysia	MYS	Internet hosts (per 10,000 people)	IT.NET.HOST.P4	2016-07-01	201607	..	..	..	..	..	..
592	Malaysia	MYS	Internet users (per 1,000 people)	IT.NET.USER.P3	2016-07-01	201607	..	..	..	..	..	..
593	Malaysia	MYS	Schools connected to the Internet (%)	IT.NET.EDUC.ZS	2016-07-01	201607	..	..	..	..	..	..
594	Malaysia	MYS	Secure Internet servers (per 1 million people)	IT.NET.SECR.P6	2016-07-01	201607	41.8926	54.982	66.1568	67.4012	88.5225	103.788
595	Malaysia	MYS	Information and communication technology expenditure per capita (current US$)	IE.ICT.PCAP.CD	2016-07-01	201607	..	..	..	..	..	..
596	Malaysia	MYS	Researchers in R&D (per million people)	SP.POP.SCIE.RD.P6	2016-07-01	201607	1467.07	1653.38	1793.55	..	..	..
597	Malaysia	MYS	Scientists and engineers in research and dev. (per million people)	SP.POP.SCIE.RD	2016-07-01	201607	..	..	..	..	..	..
598	Malaysia	MYS	Pupil-teacher ratio, tertiary	SE.TER.ENRL.TC.ZS	2016-07-01	201607	14.2257	15.0993	19.5283	16.1749	..	..
599	Mali	MLI	Technicians in R&D (per million people)	SP.POP.TECH.RD.P6	2016-07-01	201607	22.5749	..	..	..	..	..
600	Mali	MLI	Technicians in research and development (per million people)	SP.POP.TECH.RD	2016-07-01	201607	..	..	..	..	..	..
601	Mali	MLI	Fixed broadband Internet subscribers (per 100 people)	IT.NET.BBND.P2	2016-07-01	201607	0.0573361	0.0588344	0.0290839	0.019011	0.0189622	..
602	Mali	MLI	International Internet bandwidth (bits per second per Internet user)	IT.NET.BNDW.PC	2016-07-01	201607	..	..	..	..	..	..
603	Mali	MLI	International Internet bandwidth (Mbps)	IT.NET.BNDW	2016-07-01	201607	..	..	..	..	..	..
604	Mali	MLI	Internet hosts (per 10,000 people)	IT.NET.HOST.P4	2016-07-01	201607	..	..	..	..	..	..
605	Mali	MLI	Internet users (per 1,000 people)	IT.NET.USER.P3	2016-07-01	201607	..	..	..	..	..	..
606	Mali	MLI	Schools connected to the Internet (%)	IT.NET.EDUC.ZS	2016-07-01	201607	..	..	..	..	..	..
607	Mali	MLI	Secure Internet servers (per 1 million people)	IT.NET.SECR.P6	2016-07-01	201607	0.725245	0.959134	0.930964	0.964315	1.2876	1.25002
608	Mali	MLI	Information and communication technology expenditure per capita (current US$)	IE.ICT.PCAP.CD	2016-07-01	201607	..	..	..	..	..	..
609	Mali	MLI	Researchers in R&D (per million people)	SP.POP.SCIE.RD.P6	2016-07-01	201607	29.1746	..	..	..	..	..
610	Mali	MLI	Scientists and engineers in research and dev. (per million people)	SP.POP.SCIE.RD	2016-07-01	201607	..	..	..	..	..	..
611	Mali	MLI	Pupil-teacher ratio, tertiary	SE.TER.ENRL.TC.ZS	2016-07-01	201607	..	..	52.4127	..	..	..
612	Mauritania	MRT	Technicians in R&D (per million people)	SP.POP.TECH.RD.P6	2016-07-01	201607	..	..	..	..	..	..
613	Mauritania	MRT	Technicians in research and development (per million people)	SP.POP.TECH.RD	2016-07-01	201607	..	..	..	..	..	..
614	Mauritania	MRT	Fixed broadband Internet subscribers (per 100 people)	IT.NET.BBND.P2	2016-07-01	201607	0.16094	0.165282	0.176416	0.193631	0.20078	..
615	Mauritania	MRT	International Internet bandwidth (bits per second per Internet user)	IT.NET.BNDW.PC	2016-07-01	201607	..	..	..	..	..	..
616	Mauritania	MRT	International Internet bandwidth (Mbps)	IT.NET.BNDW	2016-07-01	201607	..	..	..	..	..	..
617	Mauritania	MRT	Internet hosts (per 10,000 people)	IT.NET.HOST.P4	2016-07-01	201607	..	..	..	..	..	..
618	Mauritania	MRT	Internet users (per 1,000 people)	IT.NET.USER.P3	2016-07-01	201607	..	..	..	..	..	..
619	Mauritania	MRT	Schools connected to the Internet (%)	IT.NET.EDUC.ZS	2016-07-01	201607	..	..	..	..	..	..
620	Mauritania	MRT	Secure Internet servers (per 1 million people)	IT.NET.SECR.P6	2016-07-01	201607	1.9491	1.90051	1.85329	2.06575	2.51913	2.70432
621	Mauritania	MRT	Information and communication technology expenditure per capita (current US$)	IE.ICT.PCAP.CD	2016-07-01	201607	..	..	..	..	..	..
622	Mauritania	MRT	Researchers in R&D (per million people)	SP.POP.SCIE.RD.P6	2016-07-01	201607	..	..	..	..	..	..
623	Mauritania	MRT	Scientists and engineers in research and dev. (per million people)	SP.POP.SCIE.RD	2016-07-01	201607	..	..	..	..	..	..
624	Mauritania	MRT	Pupil-teacher ratio, tertiary	SE.TER.ENRL.TC.ZS	2016-07-01	201607	38.3536	41.842	44.807	42.9531	..	..
625	Montenegro	MNE	Technicians in R&D (per million people)	SP.POP.TECH.RD.P6	2016-07-01	201607	..	112.528	..	102.458	..	..
626	Montenegro	MNE	Technicians in research and development (per million people)	SP.POP.TECH.RD	2016-07-01	201607	..	..	..	..	..	..
627	Montenegro	MNE	Fixed broadband Internet subscribers (per 100 people)	IT.NET.BBND.P2	2016-07-01	201607	10.4285	10.4266	14.1315	15.4045	16.7105	..
628	Montenegro	MNE	International Internet bandwidth (bits per second per Internet user)	IT.NET.BNDW.PC	2016-07-01	201607	..	..	..	..	..	..
629	Montenegro	MNE	International Internet bandwidth (Mbps)	IT.NET.BNDW	2016-07-01	201607	..	..	..	..	..	..
630	Montenegro	MNE	Internet hosts (per 10,000 people)	IT.NET.HOST.P4	2016-07-01	201607	..	..	..	..	..	..
631	Montenegro	MNE	Internet users (per 1,000 people)	IT.NET.USER.P3	2016-07-01	201607	..	..	..	..	..	..
632	Montenegro	MNE	Schools connected to the Internet (%)	IT.NET.EDUC.ZS	2016-07-01	201607	..	..	..	..	..	..
633	Montenegro	MNE	Secure Internet servers (per 1 million people)	IT.NET.SECR.P6	2016-07-01	201607	25.8303	25.8032	30.6155	37.0247	56.2873	72.3022
634	Montenegro	MNE	Information and communication technology expenditure per capita (current US$)	IE.ICT.PCAP.CD	2016-07-01	201607	..	..	..	..	..	..
635	Montenegro	MNE	Researchers in R&D (per million people)	SP.POP.SCIE.RD.P6	2016-07-01	201607	..	760.085	..	646.764	..	..
636	Montenegro	MNE	Scientists and engineers in research and dev. (per million people)	SP.POP.SCIE.RD	2016-07-01	201607	..	..	..	..	..	..
637	Montenegro	MNE	Pupil-teacher ratio, tertiary	SE.TER.ENRL.TC.ZS	2016-07-01	201607	..	..	..	..	..	..
638	Monaco	MCO	Technicians in R&D (per million people)	SP.POP.TECH.RD.P6	2016-07-01	201607	..	..	..	..	..	..
639	Monaco	MCO	Technicians in research and development (per million people)	SP.POP.TECH.RD	2016-07-01	201607	..	..	..	..	..	..
640	Monaco	MCO	Fixed broadband Internet subscribers (per 100 people)	IT.NET.BBND.P2	2016-07-01	201607	37.4542	42.7256	43.2635	44.6618	46.7609	..
641	Monaco	MCO	International Internet bandwidth (bits per second per Internet user)	IT.NET.BNDW.PC	2016-07-01	201607	..	..	..	..	..	..
642	Monaco	MCO	International Internet bandwidth (Mbps)	IT.NET.BNDW	2016-07-01	201607	..	..	..	..	..	..
643	Monaco	MCO	Internet hosts (per 10,000 people)	IT.NET.HOST.P4	2016-07-01	201607	..	..	..	..	..	..
644	Monaco	MCO	Internet users (per 1,000 people)	IT.NET.USER.P3	2016-07-01	201607	..	..	..	..	..	..
645	Monaco	MCO	Schools connected to the Internet (%)	IT.NET.EDUC.ZS	2016-07-01	201607	..	..	..	..	..	..
646	Monaco	MCO	Secure Internet servers (per 1 million people)	IT.NET.SECR.P6	2016-07-01	201607	2442.67	3065.42	2753.72	2771.26	3216.12	3975.51
647	Monaco	MCO	Information and communication technology expenditure per capita (current US$)	IE.ICT.PCAP.CD	2016-07-01	201607	..	..	..	..	..	..
648	Monaco	MCO	Researchers in R&D (per million people)	SP.POP.SCIE.RD.P6	2016-07-01	201607	..	..	..	..	..	..
649	Monaco	MCO	Scientists and engineers in research and dev. (per million people)	SP.POP.SCIE.RD	2016-07-01	201607	..	..	..	..	..	..
650	Monaco	MCO	Pupil-teacher ratio, tertiary	SE.TER.ENRL.TC.ZS	2016-07-01	201607	..	..	..	..	..	..
651	Mozambique	MOZ	Technicians in R&D (per million people)	SP.POP.TECH.RD.P6	2016-07-01	201607	44.9344	..	..	..	..	..
652	Mozambique	MOZ	Technicians in research and development (per million people)	SP.POP.TECH.RD	2016-07-01	201607	..	..	..	..	..	..
653	Mozambique	MOZ	Fixed broadband Internet subscribers (per 100 people)	IT.NET.BBND.P2	2016-07-01	201607	0.0610541	0.0862605	0.0812748	0.0696105	0.0758774	..
654	Mozambique	MOZ	International Internet bandwidth (bits per second per Internet user)	IT.NET.BNDW.PC	2016-07-01	201607	..	..	..	..	..	..
655	Mozambique	MOZ	International Internet bandwidth (Mbps)	IT.NET.BNDW	2016-07-01	201607	..	..	..	..	..	..
656	Mozambique	MOZ	Internet hosts (per 10,000 people)	IT.NET.HOST.P4	2016-07-01	201607	..	..	..	..	..	..
657	Mozambique	MOZ	Internet users (per 1,000 people)	IT.NET.USER.P3	2016-07-01	201607	..	..	..	..	..	..
658	Mozambique	MOZ	Schools connected to the Internet (%)	IT.NET.EDUC.ZS	2016-07-01	201607	..	..	..	..	..	..
659	Mozambique	MOZ	Secure Internet servers (per 1 million people)	IT.NET.SECR.P6	2016-07-01	201607	0.822319	1.07927	1.47671	1.54909	1.76365	2.1803
660	Mozambique	MOZ	Information and communication technology expenditure per capita (current US$)	IE.ICT.PCAP.CD	2016-07-01	201607	..	..	..	..	..	..
661	Mozambique	MOZ	Researchers in R&D (per million people)	SP.POP.SCIE.RD.P6	2016-07-01	201607	37.5117	..	..	..	..	..
662	Mozambique	MOZ	Scientists and engineers in research and dev. (per million people)	SP.POP.SCIE.RD	2016-07-01	201607	..	..	..	..	..	..
663	Mozambique	MOZ	Pupil-teacher ratio, tertiary	SE.TER.ENRL.TC.ZS	2016-07-01	201607	16.2443	13.6852	14.3395	11.3701	15.2284	..
664	Namibia	NAM	Technicians in R&D (per million people)	SP.POP.TECH.RD.P6	2016-07-01	201607	..	..	..	..	..	..
665	Namibia	NAM	Technicians in research and development (per million people)	SP.POP.TECH.RD	2016-07-01	201607	..	..	..	..	..	..
666	Namibia	NAM	Fixed broadband Internet subscribers (per 100 people)	IT.NET.BBND.P2	2016-07-01	201607	0.433003	0.794095	1.06458	1.55168	1.7552	..
667	Namibia	NAM	International Internet bandwidth (bits per second per Internet user)	IT.NET.BNDW.PC	2016-07-01	201607	..	..	..	..	..	..
668	Namibia	NAM	International Internet bandwidth (Mbps)	IT.NET.BNDW	2016-07-01	201607	..	..	..	..	..	..
669	Namibia	NAM	Internet hosts (per 10,000 people)	IT.NET.HOST.P4	2016-07-01	201607	..	..	..	..	..	..
670	Namibia	NAM	Internet users (per 1,000 people)	IT.NET.USER.P3	2016-07-01	201607	..	..	..	..	..	..
671	Namibia	NAM	Schools connected to the Internet (%)	IT.NET.EDUC.ZS	2016-07-01	201607	..	..	..	..	..	..
672	Namibia	NAM	Secure Internet servers (per 1 million people)	IT.NET.SECR.P6	2016-07-01	201607	14.5876	20.5342	19.6365	17.8983	22.4732	28.4688
673	Namibia	NAM	Information and communication technology expenditure per capita (current US$)	IE.ICT.PCAP.CD	2016-07-01	201607	..	..	..	..	..	..
674	Namibia	NAM	Researchers in R&D (per million people)	SP.POP.SCIE.RD.P6	2016-07-01	201607	..	..	..	..	..	..
675	Namibia	NAM	Scientists and engineers in research and dev. (per million people)	SP.POP.SCIE.RD	2016-07-01	201607	..	..	..	..	..	..
676	Namibia	NAM	Pupil-teacher ratio, tertiary	SE.TER.ENRL.TC.ZS	2016-07-01	201607	..	..	..	..	..	..
677	New Zealand	NZL	Technicians in R&D (per million people)	SP.POP.TECH.RD.P6	2016-07-01	201607	..	1021.69	..	..	..	..
678	New Zealand	NZL	Technicians in research and development (per million people)	SP.POP.TECH.RD	2016-07-01	201607	..	..	..	..	..	..
679	New Zealand	NZL	Fixed broadband Internet subscribers (per 100 people)	IT.NET.BBND.P2	2016-07-01	201607	24.9992	26.6883	28.5211	29.2071	30.9798	..
680	New Zealand	NZL	International Internet bandwidth (bits per second per Internet user)	IT.NET.BNDW.PC	2016-07-01	201607	..	..	..	..	..	..
681	New Zealand	NZL	International Internet bandwidth (Mbps)	IT.NET.BNDW	2016-07-01	201607	..	..	..	..	..	..
682	New Zealand	NZL	Internet hosts (per 10,000 people)	IT.NET.HOST.P4	2016-07-01	201607	..	..	..	..	..	..
683	New Zealand	NZL	Internet users (per 1,000 people)	IT.NET.USER.P3	2016-07-01	201607	..	..	..	..	..	..
684	New Zealand	NZL	Schools connected to the Internet (%)	IT.NET.EDUC.ZS	2016-07-01	201607	..	..	..	..	..	..
685	New Zealand	NZL	Secure Internet servers (per 1 million people)	IT.NET.SECR.P6	2016-07-01	201607	1495.39	1605.16	1474.33	1108.03	1211.17	1298.61
686	New Zealand	NZL	Information and communication technology expenditure per capita (current US$)	IE.ICT.PCAP.CD	2016-07-01	201607	..	..	..	..	..	..
687	New Zealand	NZL	Researchers in R&D (per million people)	SP.POP.SCIE.RD.P6	2016-07-01	201607	..	3700.77	..	..	..	..
688	New Zealand	NZL	Scientists and engineers in research and dev. (per million people)	SP.POP.SCIE.RD	2016-07-01	201607	..	..	..	..	..	..
689	New Zealand	NZL	Pupil-teacher ratio, tertiary	SE.TER.ENRL.TC.ZS	2016-07-01	201607	16.0294	16.2997	17.9014	17.1569	..	..
690	Nepal	NPL	Technicians in R&D (per million people)	SP.POP.TECH.RD.P6	2016-07-01	201607	..	..	..	..	..	..
691	Nepal	NPL	Technicians in research and development (per million people)	SP.POP.TECH.RD	2016-07-01	201607	..	..	..	..	..	..
692	Nepal	NPL	Fixed broadband Internet subscribers (per 100 people)	IT.NET.BBND.P2	2016-07-01	201607	0.224156	0.348559	0.839393	1.12045	0.891164	..
693	Nepal	NPL	International Internet bandwidth (bits per second per Internet user)	IT.NET.BNDW.PC	2016-07-01	201607	..	..	..	..	..	..
694	Nepal	NPL	International Internet bandwidth (Mbps)	IT.NET.BNDW	2016-07-01	201607	..	..	..	..	..	..
695	Nepal	NPL	Internet hosts (per 10,000 people)	IT.NET.HOST.P4	2016-07-01	201607	..	..	..	..	..	..
696	Nepal	NPL	Internet users (per 1,000 people)	IT.NET.USER.P3	2016-07-01	201607	..	..	..	..	..	..
697	Nepal	NPL	Schools connected to the Internet (%)	IT.NET.EDUC.ZS	2016-07-01	201607	..	..	..	..	..	..
698	Nepal	NPL	Secure Internet servers (per 1 million people)	IT.NET.SECR.P6	2016-07-01	201607	1.67436	2.17077	2.47268	2.37112	2.9814	3.78765
699	Nepal	NPL	Information and communication technology expenditure per capita (current US$)	IE.ICT.PCAP.CD	2016-07-01	201607	..	..	..	..	..	..
700	Nepal	NPL	Researchers in R&D (per million people)	SP.POP.SCIE.RD.P6	2016-07-01	201607	..	..	..	..	..	..
701	Nepal	NPL	Scientists and engineers in research and dev. (per million people)	SP.POP.SCIE.RD	2016-07-01	201607	..	..	..	..	..	..
702	Nepal	NPL	Pupil-teacher ratio, tertiary	SE.TER.ENRL.TC.ZS	2016-07-01	201607	..	..	..	60.0097	..	..
703	Niger	NER	Technicians in R&D (per million people)	SP.POP.TECH.RD.P6	2016-07-01	201607	..	..	..	..	..	..
704	Niger	NER	Technicians in research and development (per million people)	SP.POP.TECH.RD	2016-07-01	201607	..	..	..	..	..	..
705	Niger	NER	Fixed broadband Internet subscribers (per 100 people)	IT.NET.BBND.P2	2016-07-01	201607	0.00943767	0.0128032	0.0213848	0.035892	0.0496364	..
706	Niger	NER	International Internet bandwidth (bits per second per Internet user)	IT.NET.BNDW.PC	2016-07-01	201607	..	..	..	..	..	..
707	Niger	NER	International Internet bandwidth (Mbps)	IT.NET.BNDW	2016-07-01	201607	..	..	..	..	..	..
708	Niger	NER	Internet hosts (per 10,000 people)	IT.NET.HOST.P4	2016-07-01	201607	..	..	..	..	..	..
709	Niger	NER	Internet users (per 1,000 people)	IT.NET.USER.P3	2016-07-01	201607	..	..	..	..	..	..
710	Niger	NER	Schools connected to the Internet (%)	IT.NET.EDUC.ZS	2016-07-01	201607	..	..	..	..	..	..
711	Niger	NER	Secure Internet servers (per 1 million people)	IT.NET.SECR.P6	2016-07-01	201607	0.18414	0.295046	0.283515	0.163409	0.156955	0.251267
712	Niger	NER	Information and communication technology expenditure per capita (current US$)	IE.ICT.PCAP.CD	2016-07-01	201607	..	..	..	..	..	..
713	Niger	NER	Researchers in R&D (per million people)	SP.POP.SCIE.RD.P6	2016-07-01	201607	..	..	..	..	..	..
714	Niger	NER	Scientists and engineers in research and dev. (per million people)	SP.POP.SCIE.RD	2016-07-01	201607	..	..	..	..	..	..
715	Niger	NER	Pupil-teacher ratio, tertiary	SE.TER.ENRL.TC.ZS	2016-07-01	201607	11.277	..	12.3309	..	..	..
716	Norway	NOR	Technicians in R&D (per million people)	SP.POP.TECH.RD.P6	2016-07-01	201607	..	..	..	..	..	..
717	Norway	NOR	Technicians in research and development (per million people)	SP.POP.TECH.RD	2016-07-01	201607	..	..	..	..	..	..
718	Norway	NOR	Fixed broadband Internet subscribers (per 100 people)	IT.NET.BBND.P2	2016-07-01	201607	35.2334	36.1198	37.2001	38.0829	38.8284	..
719	Norway	NOR	International Internet bandwidth (bits per second per Internet user)	IT.NET.BNDW.PC	2016-07-01	201607	..	..	..	..	..	..
720	Norway	NOR	International Internet bandwidth (Mbps)	IT.NET.BNDW	2016-07-01	201607	..	..	..	..	..	..
721	Norway	NOR	Internet hosts (per 10,000 people)	IT.NET.HOST.P4	2016-07-01	201607	..	..	..	..	..	..
722	Norway	NOR	Internet users (per 1,000 people)	IT.NET.USER.P3	2016-07-01	201607	..	..	..	..	..	..
723	Norway	NOR	Schools connected to the Internet (%)	IT.NET.EDUC.ZS	2016-07-01	201607	..	..	..	..	..	..
724	Norway	NOR	Secure Internet servers (per 1 million people)	IT.NET.SECR.P6	2016-07-01	201607	1651.17	1810.18	1879.02	1727.29	1941.71	2030.44
725	Norway	NOR	Information and communication technology expenditure per capita (current US$)	IE.ICT.PCAP.CD	2016-07-01	201607	..	..	..	..	..	..
726	Norway	NOR	Researchers in R&D (per million people)	SP.POP.SCIE.RD.P6	2016-07-01	201607	5407.82	5496.23	5547.82	5575.54	..	..
727	Norway	NOR	Scientists and engineers in research and dev. (per million people)	SP.POP.SCIE.RD	2016-07-01	201607	..	..	..	..	..	..
728	Norway	NOR	Pupil-teacher ratio, tertiary	SE.TER.ENRL.TC.ZS	2016-07-01	201607	..	..	10.0827	10.4597	..	..
729	Panama	PAN	Technicians in R&D (per million people)	SP.POP.TECH.RD.P6	2016-07-01	201607	..	45.8992	..	..	..	..
730	Panama	PAN	Technicians in research and development (per million people)	SP.POP.TECH.RD	2016-07-01	201607	..	..	..	..	..	..
731	Panama	PAN	Fixed broadband Internet subscribers (per 100 people)	IT.NET.BBND.P2	2016-07-01	201607	7.02238	7.56208	7.75164	7.95167	7.8977	..
732	Panama	PAN	International Internet bandwidth (bits per second per Internet user)	IT.NET.BNDW.PC	2016-07-01	201607	..	..	..	..	..	..
733	Panama	PAN	International Internet bandwidth (Mbps)	IT.NET.BNDW	2016-07-01	201607	..	..	..	..	..	..
734	Panama	PAN	Internet hosts (per 10,000 people)	IT.NET.HOST.P4	2016-07-01	201607	..	..	..	..	..	..
735	Panama	PAN	Internet users (per 1,000 people)	IT.NET.USER.P3	2016-07-01	201607	..	..	..	..	..	..
736	Panama	PAN	Schools connected to the Internet (%)	IT.NET.EDUC.ZS	2016-07-01	201607	..	..	..	..	..	..
737	Panama	PAN	Secure Internet servers (per 1 million people)	IT.NET.SECR.P6	2016-07-01	201607	123.187	138.784	135.96	91.1794	116.612	121.91
738	Panama	PAN	Information and communication technology expenditure per capita (current US$)	IE.ICT.PCAP.CD	2016-07-01	201607	..	..	..	..	..	..
739	Panama	PAN	Researchers in R&D (per million people)	SP.POP.SCIE.RD.P6	2016-07-01	201607	111.47	118.958	..	..	..	..
740	Panama	PAN	Scientists and engineers in research and dev. (per million people)	SP.POP.SCIE.RD	2016-07-01	201607	..	..	..	..	..	..
741	Panama	PAN	Pupil-teacher ratio, tertiary	SE.TER.ENRL.TC.ZS	2016-07-01	201607	9.20384	9.94465	10.1398	10.8767	..	..
742	Paraguay	PRY	Technicians in R&D (per million people)	SP.POP.TECH.RD.P6	2016-07-01	201607	..	12.5521	..	..	..	..
743	Paraguay	PRY	Technicians in research and development (per million people)	SP.POP.TECH.RD	2016-07-01	201607	..	..	..	..	..	..
744	Paraguay	PRY	Fixed broadband Internet subscribers (per 100 people)	IT.NET.BBND.P2	2016-07-01	201607	1.3854	1.82716	2.03596	2.30181	2.43357	..
745	Paraguay	PRY	International Internet bandwidth (bits per second per Internet user)	IT.NET.BNDW.PC	2016-07-01	201607	..	..	..	..	..	..
746	Paraguay	PRY	International Internet bandwidth (Mbps)	IT.NET.BNDW	2016-07-01	201607	..	..	..	..	..	..
747	Paraguay	PRY	Internet hosts (per 10,000 people)	IT.NET.HOST.P4	2016-07-01	201607	..	..	..	..	..	..
748	Paraguay	PRY	Internet users (per 1,000 people)	IT.NET.USER.P3	2016-07-01	201607	..	..	..	..	..	..
749	Paraguay	PRY	Schools connected to the Internet (%)	IT.NET.EDUC.ZS	2016-07-01	201607	..	..	..	..	..	..
750	Paraguay	PRY	Secure Internet servers (per 1 million people)	IT.NET.SECR.P6	2016-07-01	201607	6.92445	10.1688	11.4435	16.2396	24.1129	27.8651
751	Paraguay	PRY	Information and communication technology expenditure per capita (current US$)	IE.ICT.PCAP.CD	2016-07-01	201607	..	..	..	..	..	..
752	Paraguay	PRY	Researchers in R&D (per million people)	SP.POP.SCIE.RD.P6	2016-07-01	201607	..	50.3673	169.458	..	..	..
753	Paraguay	PRY	Scientists and engineers in research and dev. (per million people)	SP.POP.SCIE.RD	2016-07-01	201607	..	..	..	..	..	..
754	Paraguay	PRY	Pupil-teacher ratio, tertiary	SE.TER.ENRL.TC.ZS	2016-07-01	201607	..	..	..	..	..	..
755	Philippines	PHL	Technicians in R&D (per million people)	SP.POP.TECH.RD.P6	2016-07-01	201607	..	..	..	..	..	..
756	Philippines	PHL	Technicians in research and development (per million people)	SP.POP.TECH.RD	2016-07-01	201607	..	..	..	..	..	..
757	Philippines	PHL	Fixed broadband Internet subscribers (per 100 people)	IT.NET.BBND.P2	2016-07-01	201607	1.84324	8.84654	14.0937	18.1702	23.2193	..
758	Philippines	PHL	International Internet bandwidth (bits per second per Internet user)	IT.NET.BNDW.PC	2016-07-01	201607	..	..	..	..	..	..
759	Philippines	PHL	International Internet bandwidth (Mbps)	IT.NET.BNDW	2016-07-01	201607	..	..	..	..	..	..
760	Philippines	PHL	Internet hosts (per 10,000 people)	IT.NET.HOST.P4	2016-07-01	201607	..	..	..	..	..	..
761	Philippines	PHL	Internet users (per 1,000 people)	IT.NET.USER.P3	2016-07-01	201607	..	..	..	..	..	..
762	Philippines	PHL	Schools connected to the Internet (%)	IT.NET.EDUC.ZS	2016-07-01	201607	..	..	..	..	..	..
763	Philippines	PHL	Secure Internet servers (per 1 million people)	IT.NET.SECR.P6	2016-07-01	201607	6.68538	7.57662	8.68593	8.12736	10.9342	13.6843
764	Philippines	PHL	Information and communication technology expenditure per capita (current US$)	IE.ICT.PCAP.CD	2016-07-01	201607	..	..	..	..	..	..
765	Philippines	PHL	Researchers in R&D (per million people)	SP.POP.SCIE.RD.P6	2016-07-01	201607	..	..	..	..	..	..
766	Philippines	PHL	Scientists and engineers in research and dev. (per million people)	SP.POP.SCIE.RD	2016-07-01	201607	..	..	..	..	..	..
767	Philippines	PHL	Pupil-teacher ratio, tertiary	SE.TER.ENRL.TC.ZS	2016-07-01	201607	..	..	..	..	..	..
768	Portugal	PRT	Technicians in R&D (per million people)	SP.POP.TECH.RD.P6	2016-07-01	201607	378.29	340.215	338.573	..	..	..
769	Portugal	PRT	Technicians in research and development (per million people)	SP.POP.TECH.RD	2016-07-01	201607	..	..	..	..	..	..
770	Portugal	PRT	Fixed broadband Internet subscribers (per 100 people)	IT.NET.BBND.P2	2016-07-01	201607	20.0824	21.1655	22.5464	24.164	25.6685	..
771	Portugal	PRT	International Internet bandwidth (bits per second per Internet user)	IT.NET.BNDW.PC	2016-07-01	201607	..	..	..	..	..	..
772	Portugal	PRT	International Internet bandwidth (Mbps)	IT.NET.BNDW	2016-07-01	201607	..	..	..	..	..	..
773	Portugal	PRT	Internet hosts (per 10,000 people)	IT.NET.HOST.P4	2016-07-01	201607	..	..	..	..	..	..
774	Portugal	PRT	Internet users (per 1,000 people)	IT.NET.USER.P3	2016-07-01	201607	..	..	..	..	..	..
775	Portugal	PRT	Schools connected to the Internet (%)	IT.NET.EDUC.ZS	2016-07-01	201607	..	..	..	..	..	..
776	Portugal	PRT	Secure Internet servers (per 1 million people)	IT.NET.SECR.P6	2016-07-01	201607	174.689	225.431	241.183	218.412	262.762	315.887
777	Portugal	PRT	Information and communication technology expenditure per capita (current US$)	IE.ICT.PCAP.CD	2016-07-01	201607	..	..	..	..	..	..
778	Portugal	PRT	Researchers in R&D (per million people)	SP.POP.SCIE.RD.P6	2016-07-01	201607	3922.91	4172.86	4041.67	4141.72	..	..
779	Portugal	PRT	Scientists and engineers in research and dev. (per million people)	SP.POP.SCIE.RD	2016-07-01	201607	..	..	..	..	..	..
780	Portugal	PRT	Pupil-teacher ratio, tertiary	SE.TER.ENRL.TC.ZS	2016-07-01	201607	10.593	10.4106	10.5257	10.456	..	..
781	Pakistan	PAK	Technicians in R&D (per million people)	SP.POP.TECH.RD.P6	2016-07-01	201607	..	59.331	..	72.1828	..	..
782	Pakistan	PAK	Technicians in research and development (per million people)	SP.POP.TECH.RD	2016-07-01	201607	..	..	..	..	..	..
783	Pakistan	PAK	Fixed broadband Internet subscribers (per 100 people)	IT.NET.BBND.P2	2016-07-01	201607	0.455957	0.662045	0.846622	0.893863	1.085	..
784	Pakistan	PAK	International Internet bandwidth (bits per second per Internet user)	IT.NET.BNDW.PC	2016-07-01	201607	..	..	..	..	..	..
785	Pakistan	PAK	International Internet bandwidth (Mbps)	IT.NET.BNDW	2016-07-01	201607	..	..	..	..	..	..
786	Pakistan	PAK	Internet hosts (per 10,000 people)	IT.NET.HOST.P4	2016-07-01	201607	..	..	..	..	..	..
787	Pakistan	PAK	Internet users (per 1,000 people)	IT.NET.USER.P3	2016-07-01	201607	..	..	..	..	..	..
788	Pakistan	PAK	Schools connected to the Internet (%)	IT.NET.EDUC.ZS	2016-07-01	201607	..	..	..	..	..	..
789	Pakistan	PAK	Secure Internet servers (per 1 million people)	IT.NET.SECR.P6	2016-07-01	201607	0.993861	1.13434	1.28529	1.28592	1.84821	2.37131
790	Pakistan	PAK	Information and communication technology expenditure per capita (current US$)	IE.ICT.PCAP.CD	2016-07-01	201607	..	..	..	..	..	..
791	Pakistan	PAK	Researchers in R&D (per million people)	SP.POP.SCIE.RD.P6	2016-07-01	201607	..	150.994	..	166.916	..	..
792	Pakistan	PAK	Scientists and engineers in research and dev. (per million people)	SP.POP.SCIE.RD	2016-07-01	201607	..	..	..	..	..	..
793	Pakistan	PAK	Pupil-teacher ratio, tertiary	SE.TER.ENRL.TC.ZS	2016-07-01	201607	..	19.2417	20.1547	18.73	22.0466	..
794	Rwanda	RWA	Technicians in R&D (per million people)	SP.POP.TECH.RD.P6	2016-07-01	201607	..	..	..	..	..	..
795	Rwanda	RWA	Technicians in research and development (per million people)	SP.POP.TECH.RD	2016-07-01	201607	..	..	..	..	..	..
796	Rwanda	RWA	Fixed broadband Internet subscribers (per 100 people)	IT.NET.BBND.P2	2016-07-01	201607	0.0363763	0.0775732	0.0479848	0.0236148	0.0241073	..
797	Rwanda	RWA	International Internet bandwidth (bits per second per Internet user)	IT.NET.BNDW.PC	2016-07-01	201607	..	..	..	..	..	..
798	Rwanda	RWA	International Internet bandwidth (Mbps)	IT.NET.BNDW	2016-07-01	201607	..	..	..	..	..	..
799	Rwanda	RWA	Internet hosts (per 10,000 people)	IT.NET.HOST.P4	2016-07-01	201607	..	..	..	..	..	..
800	Rwanda	RWA	Internet users (per 1,000 people)	IT.NET.USER.P3	2016-07-01	201607	..	..	..	..	..	..
801	Rwanda	RWA	Schools connected to the Internet (%)	IT.NET.EDUC.ZS	2016-07-01	201607	..	..	..	..	..	..
802	Rwanda	RWA	Secure Internet servers (per 1 million people)	IT.NET.SECR.P6	2016-07-01	201607	0.68003	0.94729	2.12621	2.70805	3.87954	4.13449
803	Rwanda	RWA	Information and communication technology expenditure per capita (current US$)	IE.ICT.PCAP.CD	2016-07-01	201607	..	..	..	..	..	..
804	Rwanda	RWA	Researchers in R&D (per million people)	SP.POP.SCIE.RD.P6	2016-07-01	201607	..	..	..	..	..	..
805	Rwanda	RWA	Scientists and engineers in research and dev. (per million people)	SP.POP.SCIE.RD	2016-07-01	201607	..	..	..	..	..	..
806	Rwanda	RWA	Pupil-teacher ratio, tertiary	SE.TER.ENRL.TC.ZS	2016-07-01	201607	22.1753	28.5226	..	25.8099	..	..
807	Romania	ROM	Technicians in R&D (per million people)	SP.POP.TECH.RD.P6	2016-07-01	201607	154.639	255.175	255.453	252.246	..	..
808	Romania	ROM	Technicians in research and development (per million people)	SP.POP.TECH.RD	2016-07-01	201607	..	..	..	..	..	..
809	Romania	ROM	Fixed broadband Internet subscribers (per 100 people)	IT.NET.BBND.P2	2016-07-01	201607	13.7255	15.0542	16.2785	17.4678	18.5211	..
810	Romania	ROM	International Internet bandwidth (bits per second per Internet user)	IT.NET.BNDW.PC	2016-07-01	201607	..	..	..	..	..	..
811	Romania	ROM	International Internet bandwidth (Mbps)	IT.NET.BNDW	2016-07-01	201607	..	..	..	..	..	..
812	Romania	ROM	Internet hosts (per 10,000 people)	IT.NET.HOST.P4	2016-07-01	201607	..	..	..	..	..	..
813	Romania	ROM	Internet users (per 1,000 people)	IT.NET.USER.P3	2016-07-01	201607	..	..	..	..	..	..
814	Romania	ROM	Schools connected to the Internet (%)	IT.NET.EDUC.ZS	2016-07-01	201607	..	..	..	..	..	..
815	Romania	ROM	Secure Internet servers (per 1 million people)	IT.NET.SECR.P6	2016-07-01	201607	42.1794	56.9797	70.7946	68.9562	125.119	229.271
816	Romania	ROM	Information and communication technology expenditure per capita (current US$)	IE.ICT.PCAP.CD	2016-07-01	201607	..	..	..	..	..	..
817	Romania	ROM	Researchers in R&D (per million people)	SP.POP.SCIE.RD.P6	2016-07-01	201607	974.44	799.536	903.286	944.925	..	..
818	Romania	ROM	Scientists and engineers in research and dev. (per million people)	SP.POP.SCIE.RD	2016-07-01	201607	..	..	..	..	..	..
819	Romania	ROM	Pupil-teacher ratio, tertiary	SE.TER.ENRL.TC.ZS	2016-07-01	201607	32.1359	29.3096	..	22.4336	..	..
820	San Marino	SMR	Technicians in R&D (per million people)	SP.POP.TECH.RD.P6	2016-07-01	201607	..	..	..	..	..	..
821	San Marino	SMR	Technicians in research and development (per million people)	SP.POP.TECH.RD	2016-07-01	201607	..	..	..	..	..	..
822	San Marino	SMR	Fixed broadband Internet subscribers (per 100 people)	IT.NET.BBND.P2	2016-07-01	201607	19.4161	21.0577	31.6894	32.5331	36.982	..
823	San Marino	SMR	International Internet bandwidth (bits per second per Internet user)	IT.NET.BNDW.PC	2016-07-01	201607	..	..	..	..	..	..
824	San Marino	SMR	International Internet bandwidth (Mbps)	IT.NET.BNDW	2016-07-01	201607	..	..	..	..	..	..
825	San Marino	SMR	Internet hosts (per 10,000 people)	IT.NET.HOST.P4	2016-07-01	201607	..	..	..	..	..	..
826	San Marino	SMR	Internet users (per 1,000 people)	IT.NET.USER.P3	2016-07-01	201607	..	..	..	..	..	..
827	San Marino	SMR	Schools connected to the Internet (%)	IT.NET.EDUC.ZS	2016-07-01	201607	..	..	..	..	..	..
828	San Marino	SMR	Secure Internet servers (per 1 million people)	IT.NET.SECR.P6	2016-07-01	201607	1270.77	1680.78	1668.16	1433.53	1867.38	1636.2
829	San Marino	SMR	Information and communication technology expenditure per capita (current US$)	IE.ICT.PCAP.CD	2016-07-01	201607	..	..	..	..	..	..
830	San Marino	SMR	Researchers in R&D (per million people)	SP.POP.SCIE.RD.P6	2016-07-01	201607	..	..	..	..	..	..
831	San Marino	SMR	Scientists and engineers in research and dev. (per million people)	SP.POP.SCIE.RD	2016-07-01	201607	..	..	..	..	..	..
832	San Marino	SMR	Pupil-teacher ratio, tertiary	SE.TER.ENRL.TC.ZS	2016-07-01	201607	..	..	..	..	..	..
833	Serbia	SRB	Technicians in R&D (per million people)	SP.POP.TECH.RD.P6	2016-07-01	201607	268.03	239.897	249.806	259.689	..	..
834	Serbia	SRB	Technicians in research and development (per million people)	SP.POP.TECH.RD	2016-07-01	201607	..	..	..	..	..	..
835	Serbia	SRB	Fixed broadband Internet subscribers (per 100 people)	IT.NET.BBND.P2	2016-07-01	201607	10.8665	12.4134	13.7132	15.2328	15.5666	..
836	Serbia	SRB	International Internet bandwidth (bits per second per Internet user)	IT.NET.BNDW.PC	2016-07-01	201607	..	..	..	..	..	..
837	Serbia	SRB	International Internet bandwidth (Mbps)	IT.NET.BNDW	2016-07-01	201607	..	..	..	..	..	..
838	Serbia	SRB	Internet hosts (per 10,000 people)	IT.NET.HOST.P4	2016-07-01	201607	..	..	..	..	..	..
839	Serbia	SRB	Internet users (per 1,000 people)	IT.NET.USER.P3	2016-07-01	201607	..	..	..	..	..	..
840	Serbia	SRB	Schools connected to the Internet (%)	IT.NET.EDUC.ZS	2016-07-01	201607	..	..	..	..	..	..
841	Serbia	SRB	Secure Internet servers (per 1 million people)	IT.NET.SECR.P6	2016-07-01	201607	19.8863	29.0292	37.7826	34.7565	43.7552	63.5368
842	Serbia	SRB	Information and communication technology expenditure per capita (current US$)	IE.ICT.PCAP.CD	2016-07-01	201607	..	..	..	..	..	..
843	Serbia	SRB	Researchers in R&D (per million people)	SP.POP.SCIE.RD.P6	2016-07-01	201607	1212.59	1298.76	1313.87	1380.91	..	..
844	Serbia	SRB	Scientists and engineers in research and dev. (per million people)	SP.POP.SCIE.RD	2016-07-01	201607	..	..	..	..	..	..
845	Serbia	SRB	Pupil-teacher ratio, tertiary	SE.TER.ENRL.TC.ZS	2016-07-01	201607	15.31	15.3831	15.4132	23.3847	23.219	..
846	Sierra Leone	SLE	Technicians in R&D (per million people)	SP.POP.TECH.RD.P6	2016-07-01	201607	..	..	..	..	..	..
847	Sierra Leone	SLE	Technicians in research and development (per million people)	SP.POP.TECH.RD	2016-07-01	201607	..	..	..	..	..	..
848	Sierra Leone	SLE	Fixed broadband Internet subscribers (per 100 people)	IT.NET.BBND.P2	2016-07-01	201607	..	..	..	..	..	..
849	Sierra Leone	SLE	International Internet bandwidth (bits per second per Internet user)	IT.NET.BNDW.PC	2016-07-01	201607	..	..	..	..	..	..
850	Sierra Leone	SLE	International Internet bandwidth (Mbps)	IT.NET.BNDW	2016-07-01	201607	..	..	..	..	..	..
851	Sierra Leone	SLE	Internet hosts (per 10,000 people)	IT.NET.HOST.P4	2016-07-01	201607	..	..	..	..	..	..
852	Sierra Leone	SLE	Internet users (per 1,000 people)	IT.NET.USER.P3	2016-07-01	201607	..	..	..	..	..	..
853	Sierra Leone	SLE	Schools connected to the Internet (%)	IT.NET.EDUC.ZS	2016-07-01	201607	..	..	..	..	..	..
854	Sierra Leone	SLE	Secure Internet servers (per 1 million people)	IT.NET.SECR.P6	2016-07-01	201607	0.173133	0.676944	0.661906	0.809211	0.950024	0.929774
855	Sierra Leone	SLE	Information and communication technology expenditure per capita (current US$)	IE.ICT.PCAP.CD	2016-07-01	201607	..	..	..	..	..	..
856	Sierra Leone	SLE	Researchers in R&D (per million people)	SP.POP.SCIE.RD.P6	2016-07-01	201607	..	..	..	..	..	..
857	Sierra Leone	SLE	Scientists and engineers in research and dev. (per million people)	SP.POP.SCIE.RD	2016-07-01	201607	..	..	..	..	..	..
858	Sierra Leone	SLE	Pupil-teacher ratio, tertiary	SE.TER.ENRL.TC.ZS	2016-07-01	201607	..	..	..	..	..	..
859	Slovenia	SVN	Technicians in R&D (per million people)	SP.POP.TECH.RD.P6	2016-07-01	201607	1913.78	2450.19	2307.45	2520.8	..	..
860	Slovenia	SVN	Technicians in research and development (per million people)	SP.POP.TECH.RD	2016-07-01	201607	..	..	..	..	..	..
861	Slovenia	SVN	Fixed broadband Internet subscribers (per 100 people)	IT.NET.BBND.P2	2016-07-01	201607	22.9053	23.9759	24.6328	25.3196	26.5508	..
862	Slovenia	SVN	International Internet bandwidth (bits per second per Internet user)	IT.NET.BNDW.PC	2016-07-01	201607	..	..	..	..	..	..
863	Slovenia	SVN	International Internet bandwidth (Mbps)	IT.NET.BNDW	2016-07-01	201607	..	..	..	..	..	..
864	Slovenia	SVN	Internet hosts (per 10,000 people)	IT.NET.HOST.P4	2016-07-01	201607	..	..	..	..	..	..
865	Slovenia	SVN	Internet users (per 1,000 people)	IT.NET.USER.P3	2016-07-01	201607	..	..	..	..	..	..
866	Slovenia	SVN	Schools connected to the Internet (%)	IT.NET.EDUC.ZS	2016-07-01	201607	..	..	..	..	..	..
867	Slovenia	SVN	Secure Internet servers (per 1 million people)	IT.NET.SECR.P6	2016-07-01	201607	303.625	433.058	557.079	547.585	648.406	806.777
868	Slovenia	SVN	Information and communication technology expenditure per capita (current US$)	IE.ICT.PCAP.CD	2016-07-01	201607	..	..	..	..	..	..
869	Slovenia	SVN	Researchers in R&D (per million people)	SP.POP.SCIE.RD.P6	2016-07-01	201607	3753.02	4261.24	4306.6	4216.83	..	..
870	Slovenia	SVN	Scientists and engineers in research and dev. (per million people)	SP.POP.SCIE.RD	2016-07-01	201607	..	..	..	..	..	..
871	Slovenia	SVN	Pupil-teacher ratio, tertiary	SE.TER.ENRL.TC.ZS	2016-07-01	201607	16.5356	14.8508	14.1539	13.591	..	..
872	South Africa	ZAF	Technicians in R&D (per million people)	SP.POP.TECH.RD.P6	2016-07-01	201607	104.794	106.569	124.579	..	..	..
873	South Africa	ZAF	Technicians in research and development (per million people)	SP.POP.TECH.RD	2016-07-01	201607	..	..	..	..	..	..
874	South Africa	ZAF	Fixed broadband Internet subscribers (per 100 people)	IT.NET.BBND.P2	2016-07-01	201607	1.44405	1.74594	2.11355	3.06049	3.21101	..
875	South Africa	ZAF	International Internet bandwidth (bits per second per Internet user)	IT.NET.BNDW.PC	2016-07-01	201607	..	..	..	..	..	..
876	South Africa	ZAF	International Internet bandwidth (Mbps)	IT.NET.BNDW	2016-07-01	201607	..	..	..	..	..	..
877	South Africa	ZAF	Internet hosts (per 10,000 people)	IT.NET.HOST.P4	2016-07-01	201607	..	..	..	..	..	..
878	South Africa	ZAF	Internet users (per 1,000 people)	IT.NET.USER.P3	2016-07-01	201607	..	..	..	..	..	..
879	South Africa	ZAF	Schools connected to the Internet (%)	IT.NET.EDUC.ZS	2016-07-01	201607	..	..	..	..	..	..
880	South Africa	ZAF	Secure Internet servers (per 1 million people)	IT.NET.SECR.P6	2016-07-01	201607	61.6287	72.4928	81.8811	86.0088	115.43	129.975
881	South Africa	ZAF	Information and communication technology expenditure per capita (current US$)	IE.ICT.PCAP.CD	2016-07-01	201607	..	..	..	..	..	..
882	South Africa	ZAF	Researchers in R&D (per million people)	SP.POP.SCIE.RD.P6	2016-07-01	201607	362.63	385.071	404.686	..	..	..
883	South Africa	ZAF	Scientists and engineers in research and dev. (per million people)	SP.POP.SCIE.RD	2016-07-01	201607	..	..	..	..	..	..
884	South Africa	ZAF	Pupil-teacher ratio, tertiary	SE.TER.ENRL.TC.ZS	2016-07-01	201607	..	..	..	..	..	..
885	South Sudan	SSD	Technicians in R&D (per million people)	SP.POP.TECH.RD.P6	2016-07-01	201607	..	..	..	..	..	..
886	South Sudan	SSD	Technicians in research and development (per million people)	SP.POP.TECH.RD	2016-07-01	201607	..	..	..	..	..	..
887	South Sudan	SSD	Fixed broadband Internet subscribers (per 100 people)	IT.NET.BBND.P2	2016-07-01	201607	1.92658e-05	3.85315e-05	0.000156862	0.000885256	0.000851882	..
888	South Sudan	SSD	International Internet bandwidth (bits per second per Internet user)	IT.NET.BNDW.PC	2016-07-01	201607	..	..	..	..	..	..
889	South Sudan	SSD	International Internet bandwidth (Mbps)	IT.NET.BNDW	2016-07-01	201607	..	..	..	..	..	..
890	South Sudan	SSD	Internet hosts (per 10,000 people)	IT.NET.HOST.P4	2016-07-01	201607	..	..	..	..	..	..
891	South Sudan	SSD	Internet users (per 1,000 people)	IT.NET.USER.P3	2016-07-01	201607	..	..	..	..	..	..
892	South Sudan	SSD	Schools connected to the Internet (%)	IT.NET.EDUC.ZS	2016-07-01	201607	..	..	..	..	..	..
893	South Sudan	SSD	Secure Internet servers (per 1 million people)	IT.NET.SECR.P6	2016-07-01	201607	..	..	..	..	0.167909	0.243116
894	South Sudan	SSD	Information and communication technology expenditure per capita (current US$)	IE.ICT.PCAP.CD	2016-07-01	201607	..	..	..	..	..	..
895	South Sudan	SSD	Researchers in R&D (per million people)	SP.POP.SCIE.RD.P6	2016-07-01	201607	..	..	..	..	..	..
896	South Sudan	SSD	Scientists and engineers in research and dev. (per million people)	SP.POP.SCIE.RD	2016-07-01	201607	..	..	..	..	..	..
897	South Sudan	SSD	Pupil-teacher ratio, tertiary	SE.TER.ENRL.TC.ZS	2016-07-01	201607	..	..	..	..	..	..
898	Sri Lanka	LKA	Technicians in R&D (per million people)	SP.POP.TECH.RD.P6	2016-07-01	201607	91.6277	..	..	..	..	..
899	Sri Lanka	LKA	Technicians in research and development (per million people)	SP.POP.TECH.RD	2016-07-01	201607	..	..	..	..	..	..
900	Sri Lanka	LKA	Fixed broadband Internet subscribers (per 100 people)	IT.NET.BBND.P2	2016-07-01	201607	1.09985	1.71561	1.67788	1.99479	2.64668	..
901	Sri Lanka	LKA	International Internet bandwidth (bits per second per Internet user)	IT.NET.BNDW.PC	2016-07-01	201607	..	..	..	..	..	..
902	Sri Lanka	LKA	International Internet bandwidth (Mbps)	IT.NET.BNDW	2016-07-01	201607	..	..	..	..	..	..
903	Sri Lanka	LKA	Internet hosts (per 10,000 people)	IT.NET.HOST.P4	2016-07-01	201607	..	..	..	..	..	..
904	Sri Lanka	LKA	Internet users (per 1,000 people)	IT.NET.USER.P3	2016-07-01	201607	..	..	..	..	..	..
905	Sri Lanka	LKA	Schools connected to the Internet (%)	IT.NET.EDUC.ZS	2016-07-01	201607	..	..	..	..	..	..
906	Sri Lanka	LKA	Secure Internet servers (per 1 million people)	IT.NET.SECR.P6	2016-07-01	201607	4.57302	6.21608	7.63807	8.94115	11.362	13.8319
907	Sri Lanka	LKA	Information and communication technology expenditure per capita (current US$)	IE.ICT.PCAP.CD	2016-07-01	201607	..	..	..	..	..	..
908	Sri Lanka	LKA	Researchers in R&D (per million people)	SP.POP.SCIE.RD.P6	2016-07-01	201607	105.934	..	..	..	..	..
909	Sri Lanka	LKA	Scientists and engineers in research and dev. (per million people)	SP.POP.SCIE.RD	2016-07-01	201607	..	..	..	..	..	..
910	Sri Lanka	LKA	Pupil-teacher ratio, tertiary	SE.TER.ENRL.TC.ZS	2016-07-01	201607	49.5731	45.2221	..	..	..	..
911	Sub-Saharan Africa (all income levels)	SSF	Technicians in R&D (per million people)	SP.POP.TECH.RD.P6	2016-07-01	201607	..	..	..	..	..	..
912	Sub-Saharan Africa (all income levels)	SSF	Technicians in research and development (per million people)	SP.POP.TECH.RD	2016-07-01	201607	..	..	..	..	..	..
913	Sub-Saharan Africa (all income levels)	SSF	Fixed broadband Internet subscribers (per 100 people)	IT.NET.BBND.P2	2016-07-01	201607	0.161437	0.264614	0.250046	0.331973	0.380835	..
914	Sub-Saharan Africa (all income levels)	SSF	International Internet bandwidth (bits per second per Internet user)	IT.NET.BNDW.PC	2016-07-01	201607	..	..	..	..	..	..
915	Sub-Saharan Africa (all income levels)	SSF	International Internet bandwidth (Mbps)	IT.NET.BNDW	2016-07-01	201607	..	..	..	..	..	..
916	Sub-Saharan Africa (all income levels)	SSF	Internet hosts (per 10,000 people)	IT.NET.HOST.P4	2016-07-01	201607	..	..	..	..	..	..
917	Sub-Saharan Africa (all income levels)	SSF	Internet users (per 1,000 people)	IT.NET.USER.P3	2016-07-01	201607	..	..	..	..	..	..
918	Sub-Saharan Africa (all income levels)	SSF	Schools connected to the Internet (%)	IT.NET.EDUC.ZS	2016-07-01	201607	..	..	..	..	..	..
919	Sub-Saharan Africa (all income levels)	SSF	Secure Internet servers (per 1 million people)	IT.NET.SECR.P6	2016-07-01	201607	4.81763	5.75778	6.4697	6.70758	8.61133	9.87814
920	Sub-Saharan Africa (all income levels)	SSF	Information and communication technology expenditure per capita (current US$)	IE.ICT.PCAP.CD	2016-07-01	201607	..	..	..	..	..	..
921	Sub-Saharan Africa (all income levels)	SSF	Researchers in R&D (per million people)	SP.POP.SCIE.RD.P6	2016-07-01	201607	..	..	..	..	..	..
922	Sub-Saharan Africa (all income levels)	SSF	Scientists and engineers in research and dev. (per million people)	SP.POP.SCIE.RD	2016-07-01	201607	..	..	..	..	..	..
923	Sub-Saharan Africa (all income levels)	SSF	Pupil-teacher ratio, tertiary	SE.TER.ENRL.TC.ZS	2016-07-01	201607	..	..	..	..	..	..
924	Sudan	SDN	Technicians in R&D (per million people)	SP.POP.TECH.RD.P6	2016-07-01	201607	..	..	..	..	..	..
925	Sudan	SDN	Technicians in research and development (per million people)	SP.POP.TECH.RD	2016-07-01	201607	..	..	..	..	..	..
926	Sudan	SDN	Fixed broadband Internet subscribers (per 100 people)	IT.NET.BBND.P2	2016-07-01	201607	0.0309975	0.047844	0.0666454	0.0677136	0.0536649	..
927	Sudan	SDN	International Internet bandwidth (bits per second per Internet user)	IT.NET.BNDW.PC	2016-07-01	201607	..	..	..	..	..	..
928	Sudan	SDN	International Internet bandwidth (Mbps)	IT.NET.BNDW	2016-07-01	201607	..	..	..	..	..	..
929	Sudan	SDN	Internet hosts (per 10,000 people)	IT.NET.HOST.P4	2016-07-01	201607	..	..	..	..	..	..
930	Sudan	SDN	Internet users (per 1,000 people)	IT.NET.USER.P3	2016-07-01	201607	..	..	..	..	..	..
931	Sudan	SDN	Schools connected to the Internet (%)	IT.NET.EDUC.ZS	2016-07-01	201607	..	..	..	..	..	..
932	Sudan	SDN	Secure Internet servers (per 1 million people)	IT.NET.SECR.P6	2016-07-01	201607	0.0216584	0.0210845	0.0616104	0.0400249	0.0254128	0.0745622
933	Sudan	SDN	Information and communication technology expenditure per capita (current US$)	IE.ICT.PCAP.CD	2016-07-01	201607	..	..	..	..	..	..
934	Sudan	SDN	Researchers in R&D (per million people)	SP.POP.SCIE.RD.P6	2016-07-01	201607	..	..	..	..	..	..
935	Sudan	SDN	Scientists and engineers in research and dev. (per million people)	SP.POP.SCIE.RD	2016-07-01	201607	..	..	..	..	..	..
936	Sudan	SDN	Pupil-teacher ratio, tertiary	SE.TER.ENRL.TC.ZS	2016-07-01	201607	..	..	41.7606	46.4031	..	..
937	Switzerland	CHE	Technicians in R&D (per million people)	SP.POP.TECH.RD.P6	2016-07-01	201607	..	..	2764.52	..	..	..
938	Switzerland	CHE	Technicians in research and development (per million people)	SP.POP.TECH.RD	2016-07-01	201607	..	..	..	..	..	..
939	Switzerland	CHE	Fixed broadband Internet subscribers (per 100 people)	IT.NET.BBND.P2	2016-07-01	201607	37.2071	38.8915	40.1677	42.5621	42.473	..
940	Switzerland	CHE	International Internet bandwidth (bits per second per Internet user)	IT.NET.BNDW.PC	2016-07-01	201607	..	..	..	..	..	..
941	Switzerland	CHE	International Internet bandwidth (Mbps)	IT.NET.BNDW	2016-07-01	201607	..	..	..	..	..	..
942	Switzerland	CHE	Internet hosts (per 10,000 people)	IT.NET.HOST.P4	2016-07-01	201607	..	..	..	..	..	..
943	Switzerland	CHE	Internet users (per 1,000 people)	IT.NET.USER.P3	2016-07-01	201607	..	..	..	..	..	..
944	Switzerland	CHE	Schools connected to the Internet (%)	IT.NET.EDUC.ZS	2016-07-01	201607	..	..	..	..	..	..
945	Switzerland	CHE	Secure Internet servers (per 1 million people)	IT.NET.SECR.P6	2016-07-01	201607	1867.63	2136.01	2282.27	2210.69	2820.98	3100.05
946	Switzerland	CHE	Information and communication technology expenditure per capita (current US$)	IE.ICT.PCAP.CD	2016-07-01	201607	..	..	..	..	..	..
947	Switzerland	CHE	Researchers in R&D (per million people)	SP.POP.SCIE.RD.P6	2016-07-01	201607	..	..	4481.07	..	..	..
948	Switzerland	CHE	Scientists and engineers in research and dev. (per million people)	SP.POP.SCIE.RD	2016-07-01	201607	..	..	..	..	..	..
949	Switzerland	CHE	Pupil-teacher ratio, tertiary	SE.TER.ENRL.TC.ZS	2016-07-01	201607	6.24063	6.21254	5.8358	..	..	..
950	Taiwan, China	TWN	Technicians in R&D (per million people)	SP.POP.TECH.RD.P6	2016-07-01	201607	..	..	..	..	..	..
951	Taiwan, China	TWN	Technicians in research and development (per million people)	SP.POP.TECH.RD	2016-07-01	201607	..	..	..	..	..	..
952	Taiwan, China	TWN	Fixed broadband Internet subscribers (per 100 people)	IT.NET.BBND.P2	2016-07-01	201607	..	..	..	..	..	..
953	Taiwan, China	TWN	International Internet bandwidth (bits per second per Internet user)	IT.NET.BNDW.PC	2016-07-01	201607	..	..	..	..	..	..
954	Taiwan, China	TWN	International Internet bandwidth (Mbps)	IT.NET.BNDW	2016-07-01	201607	..	..	..	..	..	..
955	Taiwan, China	TWN	Internet hosts (per 10,000 people)	IT.NET.HOST.P4	2016-07-01	201607	..	..	..	..	..	..
956	Taiwan, China	TWN	Internet users (per 1,000 people)	IT.NET.USER.P3	2016-07-01	201607	..	..	..	..	..	..
957	Taiwan, China	TWN	Schools connected to the Internet (%)	IT.NET.EDUC.ZS	2016-07-01	201607	..	..	..	..	..	..
958	Taiwan, China	TWN	Secure Internet servers (per 1 million people)	IT.NET.SECR.P6	2016-07-01	201607	..	..	..	..	..	..
959	Taiwan, China	TWN	Information and communication technology expenditure per capita (current US$)	IE.ICT.PCAP.CD	2016-07-01	201607	..	..	..	..	..	..
960	Taiwan, China	TWN	Researchers in R&D (per million people)	SP.POP.SCIE.RD.P6	2016-07-01	201607	..	..	..	..	..	..
961	Taiwan, China	TWN	Scientists and engineers in research and dev. (per million people)	SP.POP.SCIE.RD	2016-07-01	201607	..	..	..	..	..	..
962	Taiwan, China	TWN	Pupil-teacher ratio, tertiary	SE.TER.ENRL.TC.ZS	2016-07-01	201607	..	..	..	..	..	..
963	Tanzania	TZA	Technicians in R&D (per million people)	SP.POP.TECH.RD.P6	2016-07-01	201607	10.3443	..	..	..	..	..
964	Tanzania	TZA	Technicians in research and development (per million people)	SP.POP.TECH.RD	2016-07-01	201607	..	..	..	..	..	..
965	Tanzania	TZA	Fixed broadband Internet subscribers (per 100 people)	IT.NET.BBND.P2	2016-07-01	201607	0.0167966	0.0609821	0.0864845	0.114561	0.166675	..
966	Tanzania	TZA	International Internet bandwidth (bits per second per Internet user)	IT.NET.BNDW.PC	2016-07-01	201607	..	..	..	..	..	..
967	Tanzania	TZA	International Internet bandwidth (Mbps)	IT.NET.BNDW	2016-07-01	201607	..	..	..	..	..	..
968	Tanzania	TZA	Internet hosts (per 10,000 people)	IT.NET.HOST.P4	2016-07-01	201607	..	..	..	..	..	..
969	Tanzania	TZA	Internet users (per 1,000 people)	IT.NET.USER.P3	2016-07-01	201607	..	..	..	..	..	..
970	Tanzania	TZA	Schools connected to the Internet (%)	IT.NET.EDUC.ZS	2016-07-01	201607	..	..	..	..	..	..
971	Tanzania	TZA	Secure Internet servers (per 1 million people)	IT.NET.SECR.P6	2016-07-01	201607	0.394317	0.488084	0.740045	1.05549	1.50513	2.03851
972	Tanzania	TZA	Information and communication technology expenditure per capita (current US$)	IE.ICT.PCAP.CD	2016-07-01	201607	..	..	..	..	..	..
973	Tanzania	TZA	Researchers in R&D (per million people)	SP.POP.SCIE.RD.P6	2016-07-01	201607	35.0417	..	..	..	..	..
974	Tanzania	TZA	Scientists and engineers in research and dev. (per million people)	SP.POP.SCIE.RD	2016-07-01	201607	..	..	..	..	..	..
975	Tanzania	TZA	Pupil-teacher ratio, tertiary	SE.TER.ENRL.TC.ZS	2016-07-01	201607	18.9266	..	34.4499	..	..	..
976	Timor-Leste	TMP	Technicians in R&D (per million people)	SP.POP.TECH.RD.P6	2016-07-01	201607	..	..	..	..	..	..
977	Timor-Leste	TMP	Technicians in research and development (per million people)	SP.POP.TECH.RD	2016-07-01	201607	..	..	..	..	..	..
978	Timor-Leste	TMP	Fixed broadband Internet subscribers (per 100 people)	IT.NET.BBND.P2	2016-07-01	201607	0.0463199	0.0501691	0.0538548	0.0617895	0.0892021	..
979	Timor-Leste	TMP	International Internet bandwidth (bits per second per Internet user)	IT.NET.BNDW.PC	2016-07-01	201607	..	..	..	..	..	..
980	Timor-Leste	TMP	International Internet bandwidth (Mbps)	IT.NET.BNDW	2016-07-01	201607	..	..	..	..	..	..
981	Timor-Leste	TMP	Internet hosts (per 10,000 people)	IT.NET.HOST.P4	2016-07-01	201607	..	..	..	..	..	..
982	Timor-Leste	TMP	Internet users (per 1,000 people)	IT.NET.USER.P3	2016-07-01	201607	..	..	..	..	..	..
983	Timor-Leste	TMP	Schools connected to the Internet (%)	IT.NET.EDUC.ZS	2016-07-01	201607	..	..	..	..	..	..
984	Timor-Leste	TMP	Secure Internet servers (per 1 million people)	IT.NET.SECR.P6	2016-07-01	201607	0.937727	2.67763	..	0.847408	0.82501	3.21281
985	Timor-Leste	TMP	Information and communication technology expenditure per capita (current US$)	IE.ICT.PCAP.CD	2016-07-01	201607	..	..	..	..	..	..
986	Timor-Leste	TMP	Researchers in R&D (per million people)	SP.POP.SCIE.RD.P6	2016-07-01	201607	..	..	..	..	..	..
987	Timor-Leste	TMP	Scientists and engineers in research and dev. (per million people)	SP.POP.SCIE.RD	2016-07-01	201607	..	..	..	..	..	..
988	Timor-Leste	TMP	Pupil-teacher ratio, tertiary	SE.TER.ENRL.TC.ZS	2016-07-01	201607	..	..	..	..	..	..
989	Ukraine	UKR	Technicians in R&D (per million people)	SP.POP.TECH.RD.P6	2016-07-01	201607	285.948	263.36	238.789	217.234	..	..
990	Ukraine	UKR	Technicians in research and development (per million people)	SP.POP.TECH.RD	2016-07-01	201607	..	..	..	..	..	..
991	Ukraine	UKR	Fixed broadband Internet subscribers (per 100 people)	IT.NET.BBND.P2	2016-07-01	201607	6.41878	6.92182	8.00567	8.83434	9.29352	..
992	Ukraine	UKR	International Internet bandwidth (bits per second per Internet user)	IT.NET.BNDW.PC	2016-07-01	201607	..	..	..	..	..	..
993	Ukraine	UKR	International Internet bandwidth (Mbps)	IT.NET.BNDW	2016-07-01	201607	..	..	..	..	..	..
994	Ukraine	UKR	Internet hosts (per 10,000 people)	IT.NET.HOST.P4	2016-07-01	201607	..	..	..	..	..	..
995	Ukraine	UKR	Internet users (per 1,000 people)	IT.NET.USER.P3	2016-07-01	201607	..	..	..	..	..	..
996	Ukraine	UKR	Schools connected to the Internet (%)	IT.NET.EDUC.ZS	2016-07-01	201607	..	..	..	..	..	..
997	Ukraine	UKR	Secure Internet servers (per 1 million people)	IT.NET.SECR.P6	2016-07-01	201607	13.2328	17.7219	23.4903	26.4896	45.4777	65.4672
998	Ukraine	UKR	Information and communication technology expenditure per capita (current US$)	IE.ICT.PCAP.CD	2016-07-01	201607	..	..	..	..	..	..
999	Ukraine	UKR	Researchers in R&D (per million people)	SP.POP.SCIE.RD.P6	2016-07-01	201607	1332.2	1261.86	1234.66	1165.18	..	..
1000	Ukraine	UKR	Scientists and engineers in research and dev. (per million people)	SP.POP.SCIE.RD	2016-07-01	201607	..	..	..	..	..	..
1001	Ukraine	UKR	Pupil-teacher ratio, tertiary	SE.TER.ENRL.TC.ZS	2016-07-01	201607	13.0902	12.7783	12.0822	11.2881	11.018	..
1002	United Kingdom	GBR	Technicians in R&D (per million people)	SP.POP.TECH.RD.P6	2016-07-01	201607	945.365	1155.52	1077.23	1093.47	..	..
1003	United Kingdom	GBR	Technicians in research and development (per million people)	SP.POP.TECH.RD	2016-07-01	201607	..	..	..	..	..	..
1004	United Kingdom	GBR	Fixed broadband Internet subscribers (per 100 people)	IT.NET.BBND.P2	2016-07-01	201607	30.8565	32.9808	34.5406	36.4922	37.3761	..
1005	United Kingdom	GBR	International Internet bandwidth (bits per second per Internet user)	IT.NET.BNDW.PC	2016-07-01	201607	..	..	..	..	..	..
1006	United Kingdom	GBR	International Internet bandwidth (Mbps)	IT.NET.BNDW	2016-07-01	201607	..	..	..	..	..	..
1007	United Kingdom	GBR	Internet hosts (per 10,000 people)	IT.NET.HOST.P4	2016-07-01	201607	..	..	..	..	..	..
1008	United Kingdom	GBR	Internet users (per 1,000 people)	IT.NET.USER.P3	2016-07-01	201607	..	..	..	..	..	..
1009	United Kingdom	GBR	Schools connected to the Internet (%)	IT.NET.EDUC.ZS	2016-07-01	201607	..	..	..	..	..	..
1010	United Kingdom	GBR	Secure Internet servers (per 1 million people)	IT.NET.SECR.P6	2016-07-01	201607	1384.15	1576.98	1467.31	1192.88	1289.18	1382.57
1011	United Kingdom	GBR	Information and communication technology expenditure per capita (current US$)	IE.ICT.PCAP.CD	2016-07-01	201607	..	..	..	..	..	..
1012	United Kingdom	GBR	Researchers in R&D (per million people)	SP.POP.SCIE.RD.P6	2016-07-01	201607	4091.18	3979.38	4029.28	4055.1	..	..
1013	United Kingdom	GBR	Scientists and engineers in research and dev. (per million people)	SP.POP.SCIE.RD	2016-07-01	201607	..	..	..	..	..	..
1014	United Kingdom	GBR	Pupil-teacher ratio, tertiary	SE.TER.ENRL.TC.ZS	2016-07-01	201607	17.6639	17.8329	17.8544	16.4233	..	..
1015	Venezuela	VEN	Technicians in R&D (per million people)	SP.POP.TECH.RD.P6	2016-07-01	201607	..	..	..	..	..	..
1016	Venezuela	VEN	Technicians in research and development (per million people)	SP.POP.TECH.RD	2016-07-01	201607	..	..	..	..	..	..
1017	Venezuela	VEN	Fixed broadband Internet subscribers (per 100 people)	IT.NET.BBND.P2	2016-07-01	201607	5.76063	6.15457	6.79928	7.34555	7.77951	..
1018	Venezuela	VEN	International Internet bandwidth (bits per second per Internet user)	IT.NET.BNDW.PC	2016-07-01	201607	..	..	..	..	..	..
1019	Venezuela	VEN	International Internet bandwidth (Mbps)	IT.NET.BNDW	2016-07-01	201607	..	..	..	..	..	..
1020	Venezuela	VEN	Internet hosts (per 10,000 people)	IT.NET.HOST.P4	2016-07-01	201607	..	..	..	..	..	..
1021	Venezuela	VEN	Internet users (per 1,000 people)	IT.NET.USER.P3	2016-07-01	201607	..	..	..	..	..	..
1022	Venezuela	VEN	Schools connected to the Internet (%)	IT.NET.EDUC.ZS	2016-07-01	201607	..	..	..	..	..	..
1023	Venezuela	VEN	Secure Internet servers (per 1 million people)	IT.NET.SECR.P6	2016-07-01	201607	7.38039	8.01967	10.7187	11.1309	12.1849	12.6977
1024	Venezuela	VEN	Information and communication technology expenditure per capita (current US$)	IE.ICT.PCAP.CD	2016-07-01	201607	..	..	..	..	..	..
1025	Venezuela	VEN	Researchers in R&D (per million people)	SP.POP.SCIE.RD.P6	2016-07-01	201607	200.133	228.357	290.947	..	..	..
1026	Venezuela	VEN	Scientists and engineers in research and dev. (per million people)	SP.POP.SCIE.RD	2016-07-01	201607	..	..	..	..	..	..
1027	Venezuela	VEN	Pupil-teacher ratio, tertiary	SE.TER.ENRL.TC.ZS	2016-07-01	201607	..	..	..	..	..	..
1028	World	WLD	Technicians in R&D (per million people)	SP.POP.TECH.RD.P6	2016-07-01	201607	..	..	..	..	..	..
1029	World	WLD	Technicians in research and development (per million people)	SP.POP.TECH.RD	2016-07-01	201607	..	..	..	..	..	..
1030	World	WLD	Fixed broadband Internet subscribers (per 100 people)	IT.NET.BBND.P2	2016-07-01	201607	7.79684	9.13452	9.52261	10.0001	10.558	..
1031	World	WLD	International Internet bandwidth (bits per second per Internet user)	IT.NET.BNDW.PC	2016-07-01	201607	..	..	..	..	..	..
1032	World	WLD	International Internet bandwidth (Mbps)	IT.NET.BNDW	2016-07-01	201607	..	..	..	..	..	..
1033	World	WLD	Internet hosts (per 10,000 people)	IT.NET.HOST.P4	2016-07-01	201607	..	..	..	..	..	..
1034	World	WLD	Internet users (per 1,000 people)	IT.NET.USER.P3	2016-07-01	201607	..	..	..	..	..	..
1035	World	WLD	Schools connected to the Internet (%)	IT.NET.EDUC.ZS	2016-07-01	201607	..	..	..	..	..	..
1036	World	WLD	Secure Internet servers (per 1 million people)	IT.NET.SECR.P6	2016-07-01	201607	154.364	183.134	180.709	159.381	188.945	208.712
1037	World	WLD	Information and communication technology expenditure per capita (current US$)	IE.ICT.PCAP.CD	2016-07-01	201607	..	..	..	..	..	..
1038	World	WLD	Researchers in R&D (per million people)	SP.POP.SCIE.RD.P6	2016-07-01	201607	1268.43	..	..	..	..	..
1039	World	WLD	Scientists and engineers in research and dev. (per million people)	SP.POP.SCIE.RD	2016-07-01	201607	..	..	..	..	..	..
1040	World	WLD	Pupil-teacher ratio, tertiary	SE.TER.ENRL.TC.ZS	2016-07-01	201607	..	..	..	..	..	..
1041	Zimbabwe	ZWE	Technicians in R&D (per million people)	SP.POP.TECH.RD.P6	2016-07-01	201607	..	..	9.67356	..	..	..
1042	Zimbabwe	ZWE	Technicians in research and development (per million people)	SP.POP.TECH.RD	2016-07-01	201607	..	..	..	..	..	..
1043	Zimbabwe	ZWE	Fixed broadband Internet subscribers (per 100 people)	IT.NET.BBND.P2	2016-07-01	201607	0.252352	0.254515	0.523924	0.734407	1.04275	..
1044	Zimbabwe	ZWE	International Internet bandwidth (bits per second per Internet user)	IT.NET.BNDW.PC	2016-07-01	201607	..	..	..	..	..	..
1045	Zimbabwe	ZWE	International Internet bandwidth (Mbps)	IT.NET.BNDW	2016-07-01	201607	..	..	..	..	..	..
1046	Zimbabwe	ZWE	Internet hosts (per 10,000 people)	IT.NET.HOST.P4	2016-07-01	201607	..	..	..	..	..	..
1047	Zimbabwe	ZWE	Internet users (per 1,000 people)	IT.NET.USER.P3	2016-07-01	201607	..	..	..	..	..	..
1048	Zimbabwe	ZWE	Schools connected to the Internet (%)	IT.NET.EDUC.ZS	2016-07-01	201607	..	..	..	..	..	..
1049	Zimbabwe	ZWE	Secure Internet servers (per 1 million people)	IT.NET.SECR.P6	2016-07-01	201607	0.930306	1.19251	2.81487	3.02052	4.52582	6.6014
1050	Zimbabwe	ZWE	Information and communication technology expenditure per capita (current US$)	IE.ICT.PCAP.CD	2016-07-01	201607	..	..	..	..	..	..
1051	Zimbabwe	ZWE	Researchers in R&D (per million people)	SP.POP.SCIE.RD.P6	2016-07-01	201607	..	..	89.6091	..	..	..
1052	Zimbabwe	ZWE	Scientists and engineers in research and dev. (per million people)	SP.POP.SCIE.RD	2016-07-01	201607	..	..	..	..	..	..
1053	Zimbabwe	ZWE	Pupil-teacher ratio, tertiary	SE.TER.ENRL.TC.ZS	2016-07-01	201607	23.1833	17.1701	17.3039	16.9975	..	..
1054	Zambia	ZMB	Technicians in R&D (per million people)	SP.POP.TECH.RD.P6	2016-07-01	201607	..	..	..	..	..	..
1055	Zambia	ZMB	Technicians in research and development (per million people)	SP.POP.TECH.RD	2016-07-01	201607	..	..	..	..	..	..
1056	Zambia	ZMB	Fixed broadband Internet subscribers (per 100 people)	IT.NET.BBND.P2	2016-07-01	201607	0.0776803	0.120399	0.106564	0.095793	0.141622	..
1057	Zambia	ZMB	International Internet bandwidth (bits per second per Internet user)	IT.NET.BNDW.PC	2016-07-01	201607	..	..	..	..	..	..
1058	Zambia	ZMB	International Internet bandwidth (Mbps)	IT.NET.BNDW	2016-07-01	201607	..	..	..	..	..	..
1059	Zambia	ZMB	Internet hosts (per 10,000 people)	IT.NET.HOST.P4	2016-07-01	201607	..	..	..	..	..	..
1060	Zambia	ZMB	Internet users (per 1,000 people)	IT.NET.USER.P3	2016-07-01	201607	..	..	..	..	..	..
1061	Zambia	ZMB	Schools connected to the Internet (%)	IT.NET.EDUC.ZS	2016-07-01	201607	..	..	..	..	..	..
1062	Zambia	ZMB	Secure Internet servers (per 1 million people)	IT.NET.SECR.P6	2016-07-01	201607	1.14964	1.46408	2.23175	2.62362	3.43482	4.31785
1063	Zambia	ZMB	Information and communication technology expenditure per capita (current US$)	IE.ICT.PCAP.CD	2016-07-01	201607	..	..	..	..	..	..
1064	Zambia	ZMB	Researchers in R&D (per million people)	SP.POP.SCIE.RD.P6	2016-07-01	201607	..	..	..	..	..	..
1065	Zambia	ZMB	Scientists and engineers in research and dev. (per million people)	SP.POP.SCIE.RD	2016-07-01	201607	..	..	..	..	..	..
1066	Zambia	ZMB	Pupil-teacher ratio, tertiary	SE.TER.ENRL.TC.ZS	2016-07-01	201607	..	..	..	..	..	..
1067	Vietnam	VNM	Technicians in R&D (per million people)	SP.POP.TECH.RD.P6	2016-07-01	201607	..	..	..	..	..	..
1068	Vietnam	VNM	Technicians in research and development (per million people)	SP.POP.TECH.RD	2016-07-01	201607	..	..	..	..	..	..
1069	Vietnam	VNM	Fixed broadband Internet subscribers (per 100 people)	IT.NET.BBND.P2	2016-07-01	201607	4.12064	4.26875	5.25946	5.62019	6.48369	..
1070	Vietnam	VNM	International Internet bandwidth (bits per second per Internet user)	IT.NET.BNDW.PC	2016-07-01	201607	..	..	..	..	..	..
1071	Vietnam	VNM	International Internet bandwidth (Mbps)	IT.NET.BNDW	2016-07-01	201607	..	..	..	..	..	..
1072	Vietnam	VNM	Internet hosts (per 10,000 people)	IT.NET.HOST.P4	2016-07-01	201607	..	..	..	..	..	..
1073	Vietnam	VNM	Internet users (per 1,000 people)	IT.NET.USER.P3	2016-07-01	201607	..	..	..	..	..	..
1074	Vietnam	VNM	Schools connected to the Internet (%)	IT.NET.EDUC.ZS	2016-07-01	201607	..	..	..	..	..	..
1075	Vietnam	VNM	Secure Internet servers (per 1 million people)	IT.NET.SECR.P6	2016-07-01	201607	3.12886	4.67788	6.69976	8.15513	11.8595	14.754
1076	Vietnam	VNM	Information and communication technology expenditure per capita (current US$)	IE.ICT.PCAP.CD	2016-07-01	201607	..	..	..	..	..	..
1077	Vietnam	VNM	Researchers in R&D (per million people)	SP.POP.SCIE.RD.P6	2016-07-01	201607	..	..	..	..	..	..
1078	Vietnam	VNM	Scientists and engineers in research and dev. (per million people)	SP.POP.SCIE.RD	2016-07-01	201607	..	..	..	..	..	..
1079	Vietnam	VNM	Pupil-teacher ratio, tertiary	SE.TER.ENRL.TC.ZS	2016-07-01	201607	29.0369	29.8968	26.8842	25.6612	29.3794	..
1080	Uruguay	URY	Technicians in R&D (per million people)	SP.POP.TECH.RD.P6	2016-07-01	201607	..	..	..	..	..	..
1081	Uruguay	URY	Technicians in research and development (per million people)	SP.POP.TECH.RD	2016-07-01	201607	..	..	..	..	..	..
1082	Uruguay	URY	Fixed broadband Internet subscribers (per 100 people)	IT.NET.BBND.P2	2016-07-01	201607	11.3746	13.976	17.1024	21.6338	24.5784	..
1083	Uruguay	URY	International Internet bandwidth (bits per second per Internet user)	IT.NET.BNDW.PC	2016-07-01	201607	..	..	..	..	..	..
1084	Uruguay	URY	International Internet bandwidth (Mbps)	IT.NET.BNDW	2016-07-01	201607	..	..	..	..	..	..
1085	Uruguay	URY	Internet hosts (per 10,000 people)	IT.NET.HOST.P4	2016-07-01	201607	..	..	..	..	..	..
1086	Uruguay	URY	Internet users (per 1,000 people)	IT.NET.USER.P3	2016-07-01	201607	..	..	..	..	..	..
1087	Uruguay	URY	Schools connected to the Internet (%)	IT.NET.EDUC.ZS	2016-07-01	201607	..	..	..	..	..	..
1088	Uruguay	URY	Secure Internet servers (per 1 million people)	IT.NET.SECR.P6	2016-07-01	201607	44.7485	70.0022	80.3709	75.1181	95.3351	106.657
1089	Uruguay	URY	Information and communication technology expenditure per capita (current US$)	IE.ICT.PCAP.CD	2016-07-01	201607	..	..	..	..	..	..
1090	Uruguay	URY	Researchers in R&D (per million people)	SP.POP.SCIE.RD.P6	2016-07-01	201607	549.132	524.868	537.278	529.054	..	..
1091	Uruguay	URY	Scientists and engineers in research and dev. (per million people)	SP.POP.SCIE.RD	2016-07-01	201607	..	..	..	..	..	..
1092	Uruguay	URY	Pupil-teacher ratio, tertiary	SE.TER.ENRL.TC.ZS	2016-07-01	201607	9.85301	..	..	..	..	..
1093	Uganda	UGA	Technicians in R&D (per million people)	SP.POP.TECH.RD.P6	2016-07-01	201607	13.5115	..	..	..	..	..
1094	Uganda	UGA	Technicians in research and development (per million people)	SP.POP.TECH.RD	2016-07-01	201607	..	..	..	..	..	..
1095	Uganda	UGA	Fixed broadband Internet subscribers (per 100 people)	IT.NET.BBND.P2	2016-07-01	201607	0.041192	0.101041	0.105652	0.268502	0.291932	..
1096	Uganda	UGA	International Internet bandwidth (bits per second per Internet user)	IT.NET.BNDW.PC	2016-07-01	201607	..	..	..	..	..	..
1097	Uganda	UGA	International Internet bandwidth (Mbps)	IT.NET.BNDW	2016-07-01	201607	..	..	..	..	..	..
1098	Uganda	UGA	Internet hosts (per 10,000 people)	IT.NET.HOST.P4	2016-07-01	201607	..	..	..	..	..	..
1099	Uganda	UGA	Internet users (per 1,000 people)	IT.NET.USER.P3	2016-07-01	201607	..	..	..	..	..	..
1100	Uganda	UGA	Schools connected to the Internet (%)	IT.NET.EDUC.ZS	2016-07-01	201607	..	..	..	..	..	..
1101	Uganda	UGA	Secure Internet servers (per 1 million people)	IT.NET.SECR.P6	2016-07-01	201607	0.874827	1.51779	1.49715	1.20306	1.61448	1.92148
1102	Uganda	UGA	Information and communication technology expenditure per capita (current US$)	IE.ICT.PCAP.CD	2016-07-01	201607	..	..	..	..	..	..
1103	Uganda	UGA	Researchers in R&D (per million people)	SP.POP.SCIE.RD.P6	2016-07-01	201607	38.0912	..	..	..	..	..
1104	Uganda	UGA	Scientists and engineers in research and dev. (per million people)	SP.POP.SCIE.RD	2016-07-01	201607	..	..	..	..	..	..
1105	Uganda	UGA	Pupil-teacher ratio, tertiary	SE.TER.ENRL.TC.ZS	2016-07-01	201607	22.5929	24.4736	..	..	..	..
1106	Togo	TGO	Technicians in R&D (per million people)	SP.POP.TECH.RD.P6	2016-07-01	201607	8.51217	8.61993	8.26467	..	..	..
1107	Togo	TGO	Technicians in research and development (per million people)	SP.POP.TECH.RD	2016-07-01	201607	..	..	..	..	..	..
1108	Togo	TGO	Fixed broadband Internet subscribers (per 100 people)	IT.NET.BBND.P2	2016-07-01	201607	0.431731	0.525918	0.624619	0.101438	0.180317	..
1109	Togo	TGO	International Internet bandwidth (bits per second per Internet user)	IT.NET.BNDW.PC	2016-07-01	201607	..	..	..	..	..	..
1110	Togo	TGO	International Internet bandwidth (Mbps)	IT.NET.BNDW	2016-07-01	201607	..	..	..	..	..	..
1111	Togo	TGO	Internet hosts (per 10,000 people)	IT.NET.HOST.P4	2016-07-01	201607	..	..	..	..	..	..
1112	Togo	TGO	Internet users (per 1,000 people)	IT.NET.USER.P3	2016-07-01	201607	..	..	..	..	..	..
1113	Togo	TGO	Schools connected to the Internet (%)	IT.NET.EDUC.ZS	2016-07-01	201607	..	..	..	..	..	..
1114	Togo	TGO	Secure Internet servers (per 1 million people)	IT.NET.SECR.P6	2016-07-01	201607	1.87768	1.97984	3.26139	3.03086	4.21635	6.29742
1115	Togo	TGO	Information and communication technology expenditure per capita (current US$)	IE.ICT.PCAP.CD	2016-07-01	201607	..	..	..	..	..	..
1116	Togo	TGO	Researchers in R&D (per million people)	SP.POP.SCIE.RD.P6	2016-07-01	201607	34.4712	34.6122	35.9346	..	..	..
1117	Togo	TGO	Scientists and engineers in research and dev. (per million people)	SP.POP.SCIE.RD	2016-07-01	201607	..	..	..	..	..	..
1118	Togo	TGO	Pupil-teacher ratio, tertiary	SE.TER.ENRL.TC.ZS	2016-07-01	201607	..	..	..	41.2645	24.4398	..
1119	Thailand	THA	Technicians in R&D (per million people)	SP.POP.TECH.RD.P6	2016-07-01	201607	..	169.096	..	..	..	..
1120	Thailand	THA	Technicians in research and development (per million people)	SP.POP.TECH.RD	2016-07-01	201607	..	..	..	..	..	..
1121	Thailand	THA	Fixed broadband Internet subscribers (per 100 people)	IT.NET.BBND.P2	2016-07-01	201607	4.8972	5.85043	6.76649	7.74804	8.46883	..
1122	Thailand	THA	International Internet bandwidth (bits per second per Internet user)	IT.NET.BNDW.PC	2016-07-01	201607	..	..	..	..	..	..
1123	Thailand	THA	International Internet bandwidth (Mbps)	IT.NET.BNDW	2016-07-01	201607	..	..	..	..	..	..
1124	Thailand	THA	Internet hosts (per 10,000 people)	IT.NET.HOST.P4	2016-07-01	201607	..	..	..	..	..	..
1125	Thailand	THA	Internet users (per 1,000 people)	IT.NET.USER.P3	2016-07-01	201607	..	..	..	..	..	..
1126	Thailand	THA	Schools connected to the Internet (%)	IT.NET.EDUC.ZS	2016-07-01	201607	..	..	..	..	..	..
1127	Thailand	THA	Secure Internet servers (per 1 million people)	IT.NET.SECR.P6	2016-07-01	201607	13.6748	17.204	19.4598	17.9833	23.3441	30.4152
1128	Thailand	THA	Information and communication technology expenditure per capita (current US$)	IE.ICT.PCAP.CD	2016-07-01	201607	..	..	..	..	..	..
1129	Thailand	THA	Researchers in R&D (per million people)	SP.POP.SCIE.RD.P6	2016-07-01	201607	..	543.474	..	..	..	..
1130	Thailand	THA	Scientists and engineers in research and dev. (per million people)	SP.POP.SCIE.RD	2016-07-01	201607	..	..	..	..	..	..
1131	Thailand	THA	Pupil-teacher ratio, tertiary	SE.TER.ENRL.TC.ZS	2016-07-01	201607	..	20.431	..	..	..	..
1132	Suriname	SUR	Technicians in R&D (per million people)	SP.POP.TECH.RD.P6	2016-07-01	201607	..	..	..	..	..	..
1133	Suriname	SUR	Technicians in research and development (per million people)	SP.POP.TECH.RD	2016-07-01	201607	..	..	..	..	..	..
1134	Suriname	SUR	Fixed broadband Internet subscribers (per 100 people)	IT.NET.BBND.P2	2016-07-01	201607	2.8846	4.37178	5.47535	6.87867	8.53059	..
1135	Suriname	SUR	International Internet bandwidth (bits per second per Internet user)	IT.NET.BNDW.PC	2016-07-01	201607	..	..	..	..	..	..
1136	Suriname	SUR	International Internet bandwidth (Mbps)	IT.NET.BNDW	2016-07-01	201607	..	..	..	..	..	..
1137	Suriname	SUR	Internet hosts (per 10,000 people)	IT.NET.HOST.P4	2016-07-01	201607	..	..	..	..	..	..
1138	Suriname	SUR	Internet users (per 1,000 people)	IT.NET.USER.P3	2016-07-01	201607	..	..	..	..	..	..
1139	Suriname	SUR	Schools connected to the Internet (%)	IT.NET.EDUC.ZS	2016-07-01	201607	..	..	..	..	..	..
1140	Suriname	SUR	Secure Internet servers (per 1 million people)	IT.NET.SECR.P6	2016-07-01	201607	21.2297	34.388	37.8404	33.7426	55.7364	81.035
1141	Suriname	SUR	Information and communication technology expenditure per capita (current US$)	IE.ICT.PCAP.CD	2016-07-01	201607	..	..	..	..	..	..
1142	Suriname	SUR	Researchers in R&D (per million people)	SP.POP.SCIE.RD.P6	2016-07-01	201607	..	..	..	..	..	..
1143	Suriname	SUR	Scientists and engineers in research and dev. (per million people)	SP.POP.SCIE.RD	2016-07-01	201607	..	..	..	..	..	..
1144	Suriname	SUR	Pupil-teacher ratio, tertiary	SE.TER.ENRL.TC.ZS	2016-07-01	201607	..	..	..	..	..	..
1145	Sweden	SWE	Technicians in R&D (per million people)	SP.POP.TECH.RD.P6	2016-07-01	201607	..	2002.57	..	..	..	..
1146	Sweden	SWE	Technicians in research and development (per million people)	SP.POP.TECH.RD	2016-07-01	201607	..	..	..	..	..	..
1147	Sweden	SWE	Fixed broadband Internet subscribers (per 100 people)	IT.NET.BBND.P2	2016-07-01	201607	31.9702	32.0401	32.3107	32.8866	34.0704	..
1148	Sweden	SWE	International Internet bandwidth (bits per second per Internet user)	IT.NET.BNDW.PC	2016-07-01	201607	..	..	..	..	..	..
1149	Sweden	SWE	International Internet bandwidth (Mbps)	IT.NET.BNDW	2016-07-01	201607	..	..	..	..	..	..
1150	Sweden	SWE	Internet hosts (per 10,000 people)	IT.NET.HOST.P4	2016-07-01	201607	..	..	..	..	..	..
1151	Sweden	SWE	Internet users (per 1,000 people)	IT.NET.USER.P3	2016-07-01	201607	..	..	..	..	..	..
1152	Sweden	SWE	Schools connected to the Internet (%)	IT.NET.EDUC.ZS	2016-07-01	201607	..	..	..	..	..	..
1153	Sweden	SWE	Secure Internet servers (per 1 million people)	IT.NET.SECR.P6	2016-07-01	201607	1268.38	1451.97	1511.44	1437.96	1601.16	1755.41
1154	Sweden	SWE	Information and communication technology expenditure per capita (current US$)	IE.ICT.PCAP.CD	2016-07-01	201607	..	..	..	..	..	..
1155	Sweden	SWE	Researchers in R&D (per million people)	SP.POP.SCIE.RD.P6	2016-07-01	201607	5255.86	5134.98	5163.75	6472.61	..	..
1156	Sweden	SWE	Scientists and engineers in research and dev. (per million people)	SP.POP.SCIE.RD	2016-07-01	201607	..	..	..	..	..	..
1157	Sweden	SWE	Pupil-teacher ratio, tertiary	SE.TER.ENRL.TC.ZS	2016-07-01	201607	15.5975	15.0345	13.9877	..	..	..
1158	Sub-Saharan Africa	SSA	Technicians in R&D (per million people)	SP.POP.TECH.RD.P6	2016-07-01	201607	..	..	..	..	..	..
1159	Sub-Saharan Africa	SSA	Technicians in research and development (per million people)	SP.POP.TECH.RD	2016-07-01	201607	..	..	..	..	..	..
1160	Sub-Saharan Africa	SSA	Fixed broadband Internet subscribers (per 100 people)	IT.NET.BBND.P2	2016-07-01	201607	0.16064	0.263147	0.248815	0.330666	0.379628	..
1161	Sub-Saharan Africa	SSA	International Internet bandwidth (bits per second per Internet user)	IT.NET.BNDW.PC	2016-07-01	201607	..	..	..	..	..	..
1162	Sub-Saharan Africa	SSA	International Internet bandwidth (Mbps)	IT.NET.BNDW	2016-07-01	201607	..	..	..	..	..	..
1163	Sub-Saharan Africa	SSA	Internet hosts (per 10,000 people)	IT.NET.HOST.P4	2016-07-01	201607	..	..	..	..	..	..
1164	Sub-Saharan Africa	SSA	Internet users (per 1,000 people)	IT.NET.USER.P3	2016-07-01	201607	..	..	..	..	..	..
1165	Sub-Saharan Africa	SSA	Schools connected to the Internet (%)	IT.NET.EDUC.ZS	2016-07-01	201607	..	..	..	..	..	..
1166	Sub-Saharan Africa	SSA	Secure Internet servers (per 1 million people)	IT.NET.SECR.P6	2016-07-01	201607	4.69946	5.62406	6.35936	6.6477	8.56774	9.83362
1167	Sub-Saharan Africa	SSA	Information and communication technology expenditure per capita (current US$)	IE.ICT.PCAP.CD	2016-07-01	201607	..	..	..	..	..	..
1168	Sub-Saharan Africa	SSA	Researchers in R&D (per million people)	SP.POP.SCIE.RD.P6	2016-07-01	201607	..	..	..	..	..	..
1169	Sub-Saharan Africa	SSA	Scientists and engineers in research and dev. (per million people)	SP.POP.SCIE.RD	2016-07-01	201607	..	..	..	..	..	..
1170	Sub-Saharan Africa	SSA	Pupil-teacher ratio, tertiary	SE.TER.ENRL.TC.ZS	2016-07-01	201607	..	..	..	..	..	..
1171	Spain	ESP	Technicians in R&D (per million people)	SP.POP.TECH.RD.P6	2016-07-01	201607	1302.46	1253.62	1244.26	1223.15	..	..
1172	Spain	ESP	Technicians in research and development (per million people)	SP.POP.TECH.RD	2016-07-01	201607	..	..	..	..	..	..
1173	Spain	ESP	Fixed broadband Internet subscribers (per 100 people)	IT.NET.BBND.P2	2016-07-01	201607	23.0661	24.0095	24.649	26.1088	27.268	..
1174	Spain	ESP	International Internet bandwidth (bits per second per Internet user)	IT.NET.BNDW.PC	2016-07-01	201607	..	..	..	..	..	..
1175	Spain	ESP	International Internet bandwidth (Mbps)	IT.NET.BNDW	2016-07-01	201607	..	..	..	..	..	..
1176	Spain	ESP	Internet hosts (per 10,000 people)	IT.NET.HOST.P4	2016-07-01	201607	..	..	..	..	..	..
1177	Spain	ESP	Internet users (per 1,000 people)	IT.NET.USER.P3	2016-07-01	201607	..	..	..	..	..	..
1178	Spain	ESP	Schools connected to the Internet (%)	IT.NET.EDUC.ZS	2016-07-01	201607	..	..	..	..	..	..
1179	Spain	ESP	Secure Internet servers (per 1 million people)	IT.NET.SECR.P6	2016-07-01	201607	230.93	281.627	290.915	269.198	316.238	362.465
1180	Spain	ESP	Information and communication technology expenditure per capita (current US$)	IE.ICT.PCAP.CD	2016-07-01	201607	..	..	..	..	..	..
1181	Spain	ESP	Researchers in R&D (per million people)	SP.POP.SCIE.RD.P6	2016-07-01	201607	2889.46	2788.26	2718.38	2652.55	..	..
1182	Spain	ESP	Scientists and engineers in research and dev. (per million people)	SP.POP.SCIE.RD	2016-07-01	201607	..	..	..	..	..	..
1183	Spain	ESP	Pupil-teacher ratio, tertiary	SE.TER.ENRL.TC.ZS	2016-07-01	201607	12.1037	12.718	12.6389	..	..	..
1184	Somalia	SOM	Technicians in R&D (per million people)	SP.POP.TECH.RD.P6	2016-07-01	201607	..	..	..	..	..	..
1185	Somalia	SOM	Technicians in research and development (per million people)	SP.POP.TECH.RD	2016-07-01	201607	..	..	..	..	..	..
1186	Somalia	SOM	Fixed broadband Internet subscribers (per 100 people)	IT.NET.BBND.P2	2016-07-01	201607	..	..	0.392344	0.571669	0.647809	..
1187	Somalia	SOM	International Internet bandwidth (bits per second per Internet user)	IT.NET.BNDW.PC	2016-07-01	201607	..	..	..	..	..	..
1188	Somalia	SOM	International Internet bandwidth (Mbps)	IT.NET.BNDW	2016-07-01	201607	..	..	..	..	..	..
1189	Somalia	SOM	Internet hosts (per 10,000 people)	IT.NET.HOST.P4	2016-07-01	201607	..	..	..	..	..	..
1190	Somalia	SOM	Internet users (per 1,000 people)	IT.NET.USER.P3	2016-07-01	201607	..	..	..	..	..	..
1191	Somalia	SOM	Schools connected to the Internet (%)	IT.NET.EDUC.ZS	2016-07-01	201607	..	..	..	..	..	..
1192	Somalia	SOM	Secure Internet servers (per 1 million people)	IT.NET.SECR.P6	2016-07-01	201607	0.104365	0.203943	0.0996648	..	0.095079	0.0927033
1193	Somalia	SOM	Information and communication technology expenditure per capita (current US$)	IE.ICT.PCAP.CD	2016-07-01	201607	..	..	..	..	..	..
1194	Somalia	SOM	Researchers in R&D (per million people)	SP.POP.SCIE.RD.P6	2016-07-01	201607	..	..	..	..	..	..
1195	Somalia	SOM	Scientists and engineers in research and dev. (per million people)	SP.POP.SCIE.RD	2016-07-01	201607	..	..	..	..	..	..
1196	Somalia	SOM	Pupil-teacher ratio, tertiary	SE.TER.ENRL.TC.ZS	2016-07-01	201607	..	..	..	..	..	..
1197	Slovak Republic	SVK	Technicians in R&D (per million people)	SP.POP.TECH.RD.P6	2016-07-01	201607	386.007	354.863	383.861	329.508	..	..
1198	Slovak Republic	SVK	Technicians in research and development (per million people)	SP.POP.TECH.RD	2016-07-01	201607	..	..	..	..	..	..
1199	Slovak Republic	SVK	Fixed broadband Internet subscribers (per 100 people)	IT.NET.BBND.P2	2016-07-01	201607	16.1399	17.5194	19.1982	20.3489	21.8405	..
1200	Slovak Republic	SVK	International Internet bandwidth (bits per second per Internet user)	IT.NET.BNDW.PC	2016-07-01	201607	..	..	..	..	..	..
1201	Slovak Republic	SVK	International Internet bandwidth (Mbps)	IT.NET.BNDW	2016-07-01	201607	..	..	..	..	..	..
1202	Slovak Republic	SVK	Internet hosts (per 10,000 people)	IT.NET.HOST.P4	2016-07-01	201607	..	..	..	..	..	..
1203	Slovak Republic	SVK	Internet users (per 1,000 people)	IT.NET.USER.P3	2016-07-01	201607	..	..	..	..	..	..
1204	Slovak Republic	SVK	Schools connected to the Internet (%)	IT.NET.EDUC.ZS	2016-07-01	201607	..	..	..	..	..	..
1205	Slovak Republic	SVK	Secure Internet servers (per 1 million people)	IT.NET.SECR.P6	2016-07-01	201607	128.537	165.049	226.349	262.867	321.298	392.511
1206	Slovak Republic	SVK	Information and communication technology expenditure per capita (current US$)	IE.ICT.PCAP.CD	2016-07-01	201607	..	..	..	..	..	..
1207	Slovak Republic	SVK	Researchers in R&D (per million people)	SP.POP.SCIE.RD.P6	2016-07-01	201607	2808.04	2832.16	2819.85	2717.59	..	..
1208	Slovak Republic	SVK	Scientists and engineers in research and dev. (per million people)	SP.POP.SCIE.RD	2016-07-01	201607	..	..	..	..	..	..
1209	Slovak Republic	SVK	Pupil-teacher ratio, tertiary	SE.TER.ENRL.TC.ZS	2016-07-01	201607	17.5899	17.3016	17.1667	16.3297	..	..
1210	Singapore	SGP	Technicians in R&D (per million people)	SP.POP.TECH.RD.P6	2016-07-01	201607	461.025	464.815	462.331	..	..	..
1211	Singapore	SGP	Technicians in research and development (per million people)	SP.POP.TECH.RD	2016-07-01	201607	..	..	..	..	..	..
1212	Singapore	SGP	Fixed broadband Internet subscribers (per 100 people)	IT.NET.BBND.P2	2016-07-01	201607	26.3518	27.1215	27.0173	27.5956	26.7169	..
1213	Singapore	SGP	International Internet bandwidth (bits per second per Internet user)	IT.NET.BNDW.PC	2016-07-01	201607	..	..	..	..	..	..
1214	Singapore	SGP	International Internet bandwidth (Mbps)	IT.NET.BNDW	2016-07-01	201607	..	..	..	..	..	..
1215	Singapore	SGP	Internet hosts (per 10,000 people)	IT.NET.HOST.P4	2016-07-01	201607	..	..	..	..	..	..
1216	Singapore	SGP	Internet users (per 1,000 people)	IT.NET.USER.P3	2016-07-01	201607	..	..	..	..	..	..
1217	Singapore	SGP	Schools connected to the Internet (%)	IT.NET.EDUC.ZS	2016-07-01	201607	..	..	..	..	..	..
1218	Singapore	SGP	Secure Internet servers (per 1 million people)	IT.NET.SECR.P6	2016-07-01	201607	529.671	607.29	635.302	609.354	822.345	932.068
1219	Singapore	SGP	Information and communication technology expenditure per capita (current US$)	IE.ICT.PCAP.CD	2016-07-01	201607	..	..	..	..	..	..
1220	Singapore	SGP	Researchers in R&D (per million people)	SP.POP.SCIE.RD.P6	2016-07-01	201607	6306.52	6495.99	6442.28	..	..	..
1221	Singapore	SGP	Scientists and engineers in research and dev. (per million people)	SP.POP.SCIE.RD	2016-07-01	201607	..	..	..	..	..	..
1222	Singapore	SGP	Pupil-teacher ratio, tertiary	SE.TER.ENRL.TC.ZS	2016-07-01	201607	13.8457	14.1116	13.7449	13.5499	..	..
1223	Serbia and Montenegro	YUG	Technicians in R&D (per million people)	SP.POP.TECH.RD.P6	2016-07-01	201607	..	..	..	..	..	..
1224	Serbia and Montenegro	YUG	Technicians in research and development (per million people)	SP.POP.TECH.RD	2016-07-01	201607	..	..	..	..	..	..
1225	Serbia and Montenegro	YUG	Fixed broadband Internet subscribers (per 100 people)	IT.NET.BBND.P2	2016-07-01	201607	..	..	..	..	..	..
1226	Serbia and Montenegro	YUG	International Internet bandwidth (bits per second per Internet user)	IT.NET.BNDW.PC	2016-07-01	201607	..	..	..	..	..	..
1227	Serbia and Montenegro	YUG	International Internet bandwidth (Mbps)	IT.NET.BNDW	2016-07-01	201607	..	..	..	..	..	..
1228	Serbia and Montenegro	YUG	Internet hosts (per 10,000 people)	IT.NET.HOST.P4	2016-07-01	201607	..	..	..	..	..	..
1229	Serbia and Montenegro	YUG	Internet users (per 1,000 people)	IT.NET.USER.P3	2016-07-01	201607	..	..	..	..	..	..
1230	Serbia and Montenegro	YUG	Schools connected to the Internet (%)	IT.NET.EDUC.ZS	2016-07-01	201607	..	..	..	..	..	..
1231	Serbia and Montenegro	YUG	Secure Internet servers (per 1 million people)	IT.NET.SECR.P6	2016-07-01	201607	..	..	..	..	..	..
1232	Serbia and Montenegro	YUG	Information and communication technology expenditure per capita (current US$)	IE.ICT.PCAP.CD	2016-07-01	201607	..	..	..	..	..	..
1233	Serbia and Montenegro	YUG	Researchers in R&D (per million people)	SP.POP.SCIE.RD.P6	2016-07-01	201607	..	..	..	..	..	..
1234	Serbia and Montenegro	YUG	Scientists and engineers in research and dev. (per million people)	SP.POP.SCIE.RD	2016-07-01	201607	..	..	..	..	..	..
1235	Serbia and Montenegro	YUG	Pupil-teacher ratio, tertiary	SE.TER.ENRL.TC.ZS	2016-07-01	201607	..	..	..	..	..	..
1236	Senegal	SEN	Technicians in R&D (per million people)	SP.POP.TECH.RD.P6	2016-07-01	201607	34.013	..	..	..	..	..
1237	Senegal	SEN	Technicians in research and development (per million people)	SP.POP.TECH.RD	2016-07-01	201607	..	..	..	..	..	..
1238	Senegal	SEN	Fixed broadband Internet subscribers (per 100 people)	IT.NET.BBND.P2	2016-07-01	201607	0.607286	0.695483	0.696203	0.755189	0.710481	..
1239	Senegal	SEN	International Internet bandwidth (bits per second per Internet user)	IT.NET.BNDW.PC	2016-07-01	201607	..	..	..	..	..	..
1240	Senegal	SEN	International Internet bandwidth (Mbps)	IT.NET.BNDW	2016-07-01	201607	..	..	..	..	..	..
1241	Senegal	SEN	Internet hosts (per 10,000 people)	IT.NET.HOST.P4	2016-07-01	201607	..	..	..	..	..	..
1242	Senegal	SEN	Internet users (per 1,000 people)	IT.NET.USER.P3	2016-07-01	201607	..	..	..	..	..	..
1243	Senegal	SEN	Schools connected to the Internet (%)	IT.NET.EDUC.ZS	2016-07-01	201607	..	..	..	..	..	..
1244	Senegal	SEN	Secure Internet servers (per 1 million people)	IT.NET.SECR.P6	2016-07-01	201607	1.08051	1.34761	2.10448	2.17987	3.54403	5.22167
1245	Senegal	SEN	Information and communication technology expenditure per capita (current US$)	IE.ICT.PCAP.CD	2016-07-01	201607	..	..	..	..	..	..
1246	Senegal	SEN	Researchers in R&D (per million people)	SP.POP.SCIE.RD.P6	2016-07-01	201607	361.123	..	..	..	..	..
1247	Senegal	SEN	Scientists and engineers in research and dev. (per million people)	SP.POP.SCIE.RD	2016-07-01	201607	..	..	..	..	..	..
1248	Senegal	SEN	Pupil-teacher ratio, tertiary	SE.TER.ENRL.TC.ZS	2016-07-01	201607	..	..	..	..	..	..
1249	Russia	RUS	Technicians in R&D (per million people)	SP.POP.TECH.RD.P6	2016-07-01	201607	475.293	492.216	477.585	486.54	..	..
1250	Russia	RUS	Technicians in research and development (per million people)	SP.POP.TECH.RD	2016-07-01	201607	..	..	..	..	..	..
1251	Russia	RUS	Fixed broadband Internet subscribers (per 100 people)	IT.NET.BBND.P2	2016-07-01	201607	10.9318	12.2944	14.6143	16.6245	17.5131	..
1252	Russia	RUS	International Internet bandwidth (bits per second per Internet user)	IT.NET.BNDW.PC	2016-07-01	201607	..	..	..	..	..	..
1253	Russia	RUS	International Internet bandwidth (Mbps)	IT.NET.BNDW	2016-07-01	201607	..	..	..	..	..	..
1254	Russia	RUS	Internet hosts (per 10,000 people)	IT.NET.HOST.P4	2016-07-01	201607	..	..	..	..	..	..
1255	Russia	RUS	Internet users (per 1,000 people)	IT.NET.USER.P3	2016-07-01	201607	..	..	..	..	..	..
1256	Russia	RUS	Schools connected to the Internet (%)	IT.NET.EDUC.ZS	2016-07-01	201607	..	..	..	..	..	..
1257	Russia	RUS	Secure Internet servers (per 1 million people)	IT.NET.SECR.P6	2016-07-01	201607	20.1891	26.9304	39.0359	51.1334	84.4183	126.387
1258	Russia	RUS	Information and communication technology expenditure per capita (current US$)	IE.ICT.PCAP.CD	2016-07-01	201607	..	..	..	..	..	..
1259	Russia	RUS	Researchers in R&D (per million people)	SP.POP.SCIE.RD.P6	2016-07-01	201607	3087.99	3125.3	3093.56	3073.09	..	..
1260	Russia	RUS	Scientists and engineers in research and dev. (per million people)	SP.POP.SCIE.RD	2016-07-01	201607	..	..	..	..	..	..
1261	Russia	RUS	Pupil-teacher ratio, tertiary	SE.TER.ENRL.TC.ZS	2016-07-01	201607	..	..	14.414	..	..	..
1262	Puerto Rico	PRI	Technicians in R&D (per million people)	SP.POP.TECH.RD.P6	2016-07-01	201607	..	..	..	160.137	..	..
1263	Puerto Rico	PRI	Technicians in research and development (per million people)	SP.POP.TECH.RD	2016-07-01	201607	..	..	..	..	..	..
1264	Puerto Rico	PRI	Fixed broadband Internet subscribers (per 100 people)	IT.NET.BBND.P2	2016-07-01	201607	14.8671	15.0823	15.5167	16.3101	16.5689	..
1265	Puerto Rico	PRI	International Internet bandwidth (bits per second per Internet user)	IT.NET.BNDW.PC	2016-07-01	201607	..	..	..	..	..	..
1266	Puerto Rico	PRI	International Internet bandwidth (Mbps)	IT.NET.BNDW	2016-07-01	201607	..	..	..	..	..	..
1267	Puerto Rico	PRI	Internet hosts (per 10,000 people)	IT.NET.HOST.P4	2016-07-01	201607	..	..	..	..	..	..
1268	Puerto Rico	PRI	Internet users (per 1,000 people)	IT.NET.USER.P3	2016-07-01	201607	..	..	..	..	..	..
1269	Puerto Rico	PRI	Schools connected to the Internet (%)	IT.NET.EDUC.ZS	2016-07-01	201607	..	..	..	..	..	..
1270	Puerto Rico	PRI	Secure Internet servers (per 1 million people)	IT.NET.SECR.P6	2016-07-01	201607	89.4794	106.287	113.909	109.655	128.434	139.026
1271	Puerto Rico	PRI	Information and communication technology expenditure per capita (current US$)	IE.ICT.PCAP.CD	2016-07-01	201607	..	..	..	..	..	..
1272	Puerto Rico	PRI	Researchers in R&D (per million people)	SP.POP.SCIE.RD.P6	2016-07-01	201607	..	..	..	260.121	..	..
1273	Puerto Rico	PRI	Scientists and engineers in research and dev. (per million people)	SP.POP.SCIE.RD	2016-07-01	201607	..	..	..	..	..	..
1274	Puerto Rico	PRI	Pupil-teacher ratio, tertiary	SE.TER.ENRL.TC.ZS	2016-07-01	201607	15.4028	15.6517	15.6247	15.5278	..	..
1275	Poland	POL	Technicians in R&D (per million people)	SP.POP.TECH.RD.P6	2016-07-01	201607	283.569	356.906	416.398	380.078	..	..
1276	Poland	POL	Technicians in research and development (per million people)	SP.POP.TECH.RD	2016-07-01	201607	..	..	..	..	..	..
1277	Poland	POL	Fixed broadband Internet subscribers (per 100 people)	IT.NET.BBND.P2	2016-07-01	201607	15.3369	18.2495	18.0254	18.3979	18.9266	..
1278	Poland	POL	International Internet bandwidth (bits per second per Internet user)	IT.NET.BNDW.PC	2016-07-01	201607	..	..	..	..	..	..
1279	Poland	POL	International Internet bandwidth (Mbps)	IT.NET.BNDW	2016-07-01	201607	..	..	..	..	..	..
1280	Poland	POL	Internet hosts (per 10,000 people)	IT.NET.HOST.P4	2016-07-01	201607	..	..	..	..	..	..
1281	Poland	POL	Internet users (per 1,000 people)	IT.NET.USER.P3	2016-07-01	201607	..	..	..	..	..	..
1282	Poland	POL	Schools connected to the Internet (%)	IT.NET.EDUC.ZS	2016-07-01	201607	..	..	..	..	..	..
1283	Poland	POL	Secure Internet servers (per 1 million people)	IT.NET.SECR.P6	2016-07-01	201607	211.578	270.76	303.39	312.985	429.525	547.139
1284	Poland	POL	Information and communication technology expenditure per capita (current US$)	IE.ICT.PCAP.CD	2016-07-01	201607	..	..	..	..	..	..
1285	Poland	POL	Researchers in R&D (per million people)	SP.POP.SCIE.RD.P6	2016-07-01	201607	1672.37	1661.72	1735.35	1850.72	..	..
1286	Poland	POL	Scientists and engineers in research and dev. (per million people)	SP.POP.SCIE.RD	2016-07-01	201607	..	..	..	..	..	..
1287	Poland	POL	Pupil-teacher ratio, tertiary	SE.TER.ENRL.TC.ZS	2016-07-01	201607	20.9433	20.272	19.7936	18.5041	..	..
1288	Peru	PER	Technicians in R&D (per million people)	SP.POP.TECH.RD.P6	2016-07-01	201607	..	..	..	..	..	..
1289	Peru	PER	Technicians in research and development (per million people)	SP.POP.TECH.RD	2016-07-01	201607	..	..	..	..	..	..
1290	Peru	PER	Fixed broadband Internet subscribers (per 100 people)	IT.NET.BBND.P2	2016-07-01	201607	3.18665	4.09175	4.81124	5.30956	5.74296	..
1291	Peru	PER	International Internet bandwidth (bits per second per Internet user)	IT.NET.BNDW.PC	2016-07-01	201607	..	..	..	..	..	..
1292	Peru	PER	International Internet bandwidth (Mbps)	IT.NET.BNDW	2016-07-01	201607	..	..	..	..	..	..
1293	Peru	PER	Internet hosts (per 10,000 people)	IT.NET.HOST.P4	2016-07-01	201607	..	..	..	..	..	..
1294	Peru	PER	Internet users (per 1,000 people)	IT.NET.USER.P3	2016-07-01	201607	..	..	..	..	..	..
1295	Peru	PER	Schools connected to the Internet (%)	IT.NET.EDUC.ZS	2016-07-01	201607	..	..	..	..	..	..
1296	Peru	PER	Secure Internet servers (per 1 million people)	IT.NET.SECR.P6	2016-07-01	201607	14.0943	18.414	21.5526	21.2331	28.0566	32.4126
1297	Peru	PER	Information and communication technology expenditure per capita (current US$)	IE.ICT.PCAP.CD	2016-07-01	201607	..	..	..	..	..	..
1298	Peru	PER	Researchers in R&D (per million people)	SP.POP.SCIE.RD.P6	2016-07-01	201607	..	..	..	..	..	..
1299	Peru	PER	Scientists and engineers in research and dev. (per million people)	SP.POP.SCIE.RD	2016-07-01	201607	..	..	..	..	..	..
1300	Peru	PER	Pupil-teacher ratio, tertiary	SE.TER.ENRL.TC.ZS	2016-07-01	201607	..	..	..	..	..	..
1301	Papua New Guinea	PNG	Technicians in R&D (per million people)	SP.POP.TECH.RD.P6	2016-07-01	201607	..	..	..	..	..	..
1302	Papua New Guinea	PNG	Technicians in research and development (per million people)	SP.POP.TECH.RD	2016-07-01	201607	..	..	..	..	..	..
1303	Papua New Guinea	PNG	Fixed broadband Internet subscribers (per 100 people)	IT.NET.BBND.P2	2016-07-01	201607	0.088935	0.106945	0.128366	0.154345	0.176562	..
1304	Papua New Guinea	PNG	International Internet bandwidth (bits per second per Internet user)	IT.NET.BNDW.PC	2016-07-01	201607	..	..	..	..	..	..
1305	Papua New Guinea	PNG	International Internet bandwidth (Mbps)	IT.NET.BNDW	2016-07-01	201607	..	..	..	..	..	..
1306	Papua New Guinea	PNG	Internet hosts (per 10,000 people)	IT.NET.HOST.P4	2016-07-01	201607	..	..	..	..	..	..
1307	Papua New Guinea	PNG	Internet users (per 1,000 people)	IT.NET.USER.P3	2016-07-01	201607	..	..	..	..	..	..
1308	Papua New Guinea	PNG	Schools connected to the Internet (%)	IT.NET.EDUC.ZS	2016-07-01	201607	..	..	..	..	..	..
1309	Papua New Guinea	PNG	Secure Internet servers (per 1 million people)	IT.NET.SECR.P6	2016-07-01	201607	3.21284	6.85599	7.26778	7.79875	10.7187	11.0246
1310	Papua New Guinea	PNG	Information and communication technology expenditure per capita (current US$)	IE.ICT.PCAP.CD	2016-07-01	201607	..	..	..	..	..	..
1311	Papua New Guinea	PNG	Researchers in R&D (per million people)	SP.POP.SCIE.RD.P6	2016-07-01	201607	..	..	..	..	..	..
1312	Papua New Guinea	PNG	Scientists and engineers in research and dev. (per million people)	SP.POP.SCIE.RD	2016-07-01	201607	..	..	..	..	..	..
1313	Papua New Guinea	PNG	Pupil-teacher ratio, tertiary	SE.TER.ENRL.TC.ZS	2016-07-01	201607	..	..	..	..	..	..
1314	Nigeria	NGA	Technicians in R&D (per million people)	SP.POP.TECH.RD.P6	2016-07-01	201607	..	..	..	..	..	..
1315	Nigeria	NGA	Technicians in research and development (per million people)	SP.POP.TECH.RD	2016-07-01	201607	..	..	..	..	..	..
1316	Nigeria	NGA	Fixed broadband Internet subscribers (per 100 people)	IT.NET.BBND.P2	2016-07-01	201607	0.0620558	..	0.00845743	0.00866571	0.00881709	..
1317	Nigeria	NGA	International Internet bandwidth (bits per second per Internet user)	IT.NET.BNDW.PC	2016-07-01	201607	..	..	..	..	..	..
1318	Nigeria	NGA	International Internet bandwidth (Mbps)	IT.NET.BNDW	2016-07-01	201607	..	..	..	..	..	..
1319	Nigeria	NGA	Internet hosts (per 10,000 people)	IT.NET.HOST.P4	2016-07-01	201607	..	..	..	..	..	..
1320	Nigeria	NGA	Internet users (per 1,000 people)	IT.NET.USER.P3	2016-07-01	201607	..	..	..	..	..	..
1321	Nigeria	NGA	Schools connected to the Internet (%)	IT.NET.EDUC.ZS	2016-07-01	201607	..	..	..	..	..	..
1322	Nigeria	NGA	Secure Internet servers (per 1 million people)	IT.NET.SECR.P6	2016-07-01	201607	1.19806	1.67918	1.7475	1.68387	2.32144	2.60151
1323	Nigeria	NGA	Information and communication technology expenditure per capita (current US$)	IE.ICT.PCAP.CD	2016-07-01	201607	..	..	..	..	..	..
1324	Nigeria	NGA	Researchers in R&D (per million people)	SP.POP.SCIE.RD.P6	2016-07-01	201607	..	..	..	..	..	..
1325	Nigeria	NGA	Scientists and engineers in research and dev. (per million people)	SP.POP.SCIE.RD	2016-07-01	201607	..	..	..	..	..	..
1326	Nigeria	NGA	Pupil-teacher ratio, tertiary	SE.TER.ENRL.TC.ZS	2016-07-01	201607	..	..	..	..	..	..
1327	Nicaragua	NIC	Technicians in R&D (per million people)	SP.POP.TECH.RD.P6	2016-07-01	201607	..	..	..	..	..	..
1328	Nicaragua	NIC	Technicians in research and development (per million people)	SP.POP.TECH.RD	2016-07-01	201607	..	..	..	..	..	..
1329	Nicaragua	NIC	Fixed broadband Internet subscribers (per 100 people)	IT.NET.BBND.P2	2016-07-01	201607	1.25861	1.44098	1.69086	2.16573	2.47705	..
1330	Nicaragua	NIC	International Internet bandwidth (bits per second per Internet user)	IT.NET.BNDW.PC	2016-07-01	201607	..	..	..	..	..	..
1331	Nicaragua	NIC	International Internet bandwidth (Mbps)	IT.NET.BNDW	2016-07-01	201607	..	..	..	..	..	..
1332	Nicaragua	NIC	Internet hosts (per 10,000 people)	IT.NET.HOST.P4	2016-07-01	201607	..	..	..	..	..	..
1333	Nicaragua	NIC	Internet users (per 1,000 people)	IT.NET.USER.P3	2016-07-01	201607	..	..	..	..	..	..
1334	Nicaragua	NIC	Schools connected to the Internet (%)	IT.NET.EDUC.ZS	2016-07-01	201607	..	..	..	..	..	..
1335	Nicaragua	NIC	Secure Internet servers (per 1 million people)	IT.NET.SECR.P6	2016-07-01	201607	7.84283	10.1588	10.5495	8.57771	11.3071	14.3044
1336	Nicaragua	NIC	Information and communication technology expenditure per capita (current US$)	IE.ICT.PCAP.CD	2016-07-01	201607	..	..	..	..	..	..
1337	Nicaragua	NIC	Researchers in R&D (per million people)	SP.POP.SCIE.RD.P6	2016-07-01	201607	..	..	..	..	..	..
1338	Nicaragua	NIC	Scientists and engineers in research and dev. (per million people)	SP.POP.SCIE.RD	2016-07-01	201607	..	..	..	..	..	..
1339	Nicaragua	NIC	Pupil-teacher ratio, tertiary	SE.TER.ENRL.TC.ZS	2016-07-01	201607	..	..	..	..	..	..
1340	Netherlands	NLD	Technicians in R&D (per million people)	SP.POP.TECH.RD.P6	2016-07-01	201607	1330.48	2023.31	..	..	..	..
1341	Netherlands	NLD	Technicians in research and development (per million people)	SP.POP.TECH.RD	2016-07-01	201607	..	..	..	..	..	..
1342	Netherlands	NLD	Fixed broadband Internet subscribers (per 100 people)	IT.NET.BBND.P2	2016-07-01	201607	38.0915	38.9891	39.8109	40.5269	40.7738	..
1343	Netherlands	NLD	International Internet bandwidth (bits per second per Internet user)	IT.NET.BNDW.PC	2016-07-01	201607	..	..	..	..	..	..
1344	Netherlands	NLD	International Internet bandwidth (Mbps)	IT.NET.BNDW	2016-07-01	201607	..	..	..	..	..	..
1345	Netherlands	NLD	Internet hosts (per 10,000 people)	IT.NET.HOST.P4	2016-07-01	201607	..	..	..	..	..	..
1346	Netherlands	NLD	Internet users (per 1,000 people)	IT.NET.USER.P3	2016-07-01	201607	..	..	..	..	..	..
1347	Netherlands	NLD	Schools connected to the Internet (%)	IT.NET.EDUC.ZS	2016-07-01	201607	..	..	..	..	..	..
1348	Netherlands	NLD	Secure Internet servers (per 1 million people)	IT.NET.SECR.P6	2016-07-01	201607	2276.68	2750.3	2805.86	2382.11	2633.38	2828.15
1349	Netherlands	NLD	Information and communication technology expenditure per capita (current US$)	IE.ICT.PCAP.CD	2016-07-01	201607	..	..	..	..	..	..
1350	Netherlands	NLD	Researchers in R&D (per million people)	SP.POP.SCIE.RD.P6	2016-07-01	201607	3228.98	3501.96	4246.9	4302.7	..	..
1351	Netherlands	NLD	Scientists and engineers in research and dev. (per million people)	SP.POP.SCIE.RD	2016-07-01	201607	..	..	..	..	..	..
1352	Netherlands	NLD	Pupil-teacher ratio, tertiary	SE.TER.ENRL.TC.ZS	2016-07-01	201607	12.5961	13.3149	13.3546	..	..	..
1353	Myanmar	MMR	Technicians in R&D (per million people)	SP.POP.TECH.RD.P6	2016-07-01	201607	..	..	..	..	..	..
1354	Myanmar	MMR	Technicians in research and development (per million people)	SP.POP.TECH.RD	2016-07-01	201607	..	..	..	..	..	..
1355	Myanmar	MMR	Fixed broadband Internet subscribers (per 100 people)	IT.NET.BBND.P2	2016-07-01	201607	0.0441931	0.0418294	0.120951	0.178991	0.267317	..
1356	Myanmar	MMR	International Internet bandwidth (bits per second per Internet user)	IT.NET.BNDW.PC	2016-07-01	201607	..	..	..	..	..	..
1357	Myanmar	MMR	International Internet bandwidth (Mbps)	IT.NET.BNDW	2016-07-01	201607	..	..	..	..	..	..
1358	Myanmar	MMR	Internet hosts (per 10,000 people)	IT.NET.HOST.P4	2016-07-01	201607	..	..	..	..	..	..
1359	Myanmar	MMR	Internet users (per 1,000 people)	IT.NET.USER.P3	2016-07-01	201607	..	..	..	..	..	..
1360	Myanmar	MMR	Schools connected to the Internet (%)	IT.NET.EDUC.ZS	2016-07-01	201607	..	..	..	..	..	..
1361	Myanmar	MMR	Secure Internet servers (per 1 million people)	IT.NET.SECR.P6	2016-07-01	201607	0.05799	0.076738	0.0951586	0.132116	0.486553	0.705047
1362	Myanmar	MMR	Information and communication technology expenditure per capita (current US$)	IE.ICT.PCAP.CD	2016-07-01	201607	..	..	..	..	..	..
1363	Myanmar	MMR	Researchers in R&D (per million people)	SP.POP.SCIE.RD.P6	2016-07-01	201607	..	..	..	..	..	..
1364	Myanmar	MMR	Scientists and engineers in research and dev. (per million people)	SP.POP.SCIE.RD	2016-07-01	201607	..	..	..	..	..	..
1365	Myanmar	MMR	Pupil-teacher ratio, tertiary	SE.TER.ENRL.TC.ZS	2016-07-01	201607	..	28.3807	25.2772	..	..	..
1366	Mongolia	MNG	Technicians in R&D (per million people)	SP.POP.TECH.RD.P6	2016-07-01	201607	..	..	..	..	..	..
1367	Mongolia	MNG	Technicians in research and development (per million people)	SP.POP.TECH.RD	2016-07-01	201607	..	..	..	..	..	..
1368	Mongolia	MNG	Fixed broadband Internet subscribers (per 100 people)	IT.NET.BBND.P2	2016-07-01	201607	2.82939	3.41485	3.93941	4.92164	6.84549	..
1369	Mongolia	MNG	International Internet bandwidth (bits per second per Internet user)	IT.NET.BNDW.PC	2016-07-01	201607	..	..	..	..	..	..
1370	Mongolia	MNG	International Internet bandwidth (Mbps)	IT.NET.BNDW	2016-07-01	201607	..	..	..	..	..	..
1371	Mongolia	MNG	Internet hosts (per 10,000 people)	IT.NET.HOST.P4	2016-07-01	201607	..	..	..	..	..	..
1372	Mongolia	MNG	Internet users (per 1,000 people)	IT.NET.USER.P3	2016-07-01	201607	..	..	..	..	..	..
1373	Mongolia	MNG	Schools connected to the Internet (%)	IT.NET.EDUC.ZS	2016-07-01	201607	..	..	..	..	..	..
1374	Mongolia	MNG	Secure Internet servers (per 1 million people)	IT.NET.SECR.P6	2016-07-01	201607	10.6906	13.7727	19.2284	22.0343	28.5236	30.0764
1375	Mongolia	MNG	Information and communication technology expenditure per capita (current US$)	IE.ICT.PCAP.CD	2016-07-01	201607	..	..	..	..	..	..
1376	Mongolia	MNG	Researchers in R&D (per million people)	SP.POP.SCIE.RD.P6	2016-07-01	201607	..	..	..	..	..	..
1377	Mongolia	MNG	Scientists and engineers in research and dev. (per million people)	SP.POP.SCIE.RD	2016-07-01	201607	..	..	..	..	..	..
1378	Mongolia	MNG	Pupil-teacher ratio, tertiary	SE.TER.ENRL.TC.ZS	2016-07-01	201607	18.8739	19.9238	20.6357	20.2092	19.717	..
1379	Moldova	MDA	Technicians in R&D (per million people)	SP.POP.TECH.RD.P6	2016-07-01	201607	70.2659	57.8742	57.4268	64.3148	..	..
1380	Moldova	MDA	Technicians in research and development (per million people)	SP.POP.TECH.RD	2016-07-01	201607	..	..	..	..	..	..
1381	Moldova	MDA	Fixed broadband Internet subscribers (per 100 people)	IT.NET.BBND.P2	2016-07-01	201607	7.57778	10.0573	11.9088	13.4597	14.7108	..
1382	Moldova	MDA	International Internet bandwidth (bits per second per Internet user)	IT.NET.BNDW.PC	2016-07-01	201607	..	..	..	..	..	..
1383	Moldova	MDA	International Internet bandwidth (Mbps)	IT.NET.BNDW	2016-07-01	201607	..	..	..	..	..	..
1384	Moldova	MDA	Internet hosts (per 10,000 people)	IT.NET.HOST.P4	2016-07-01	201607	..	..	..	..	..	..
1385	Moldova	MDA	Internet users (per 1,000 people)	IT.NET.USER.P3	2016-07-01	201607	..	..	..	..	..	..
1386	Moldova	MDA	Schools connected to the Internet (%)	IT.NET.EDUC.ZS	2016-07-01	201607	..	..	..	..	..	..
1387	Moldova	MDA	Secure Internet servers (per 1 million people)	IT.NET.SECR.P6	2016-07-01	201607	13.4754	19.663	23.0368	24.7291	48.3636	61.6181
1388	Moldova	MDA	Information and communication technology expenditure per capita (current US$)	IE.ICT.PCAP.CD	2016-07-01	201607	..	..	..	..	..	..
1389	Moldova	MDA	Researchers in R&D (per million people)	SP.POP.SCIE.RD.P6	2016-07-01	201607	663.242	678.55	671.452	643.884	..	..
1390	Moldova	MDA	Scientists and engineers in research and dev. (per million people)	SP.POP.SCIE.RD	2016-07-01	201607	..	..	..	..	..	..
1391	Moldova	MDA	Pupil-teacher ratio, tertiary	SE.TER.ENRL.TC.ZS	2016-07-01	201607	16.8284	16.2658	16.5364	16.6708	..	..
1392	Mexico	MEX	Technicians in R&D (per million people)	SP.POP.TECH.RD.P6	2016-07-01	201607	178.055	171.614	..	..	..	..
1393	Mexico	MEX	Technicians in research and development (per million people)	SP.POP.TECH.RD	2016-07-01	201607	..	..	..	..	..	..
1394	Mexico	MEX	Fixed broadband Internet subscribers (per 100 people)	IT.NET.BBND.P2	2016-07-01	201607	8.97717	9.68997	10.8213	10.4001	10.4794	..
1395	Mexico	MEX	International Internet bandwidth (bits per second per Internet user)	IT.NET.BNDW.PC	2016-07-01	201607	..	..	..	..	..	..
1396	Mexico	MEX	International Internet bandwidth (Mbps)	IT.NET.BNDW	2016-07-01	201607	..	..	..	..	..	..
1397	Mexico	MEX	Internet hosts (per 10,000 people)	IT.NET.HOST.P4	2016-07-01	201607	..	..	..	..	..	..
1398	Mexico	MEX	Internet users (per 1,000 people)	IT.NET.USER.P3	2016-07-01	201607	..	..	..	..	..	..
1399	Mexico	MEX	Schools connected to the Internet (%)	IT.NET.EDUC.ZS	2016-07-01	201607	..	..	..	..	..	..
1400	Mexico	MEX	Secure Internet servers (per 1 million people)	IT.NET.SECR.P6	2016-07-01	201607	19.702	25.5805	27.7871	26.1516	34.1107	39.16
1401	Mexico	MEX	Information and communication technology expenditure per capita (current US$)	IE.ICT.PCAP.CD	2016-07-01	201607	..	..	..	..	..	..
1402	Mexico	MEX	Researchers in R&D (per million people)	SP.POP.SCIE.RD.P6	2016-07-01	201607	379.748	383.208	..	..	..	..
1403	Mexico	MEX	Scientists and engineers in research and dev. (per million people)	SP.POP.SCIE.RD	2016-07-01	201607	..	..	..	..	..	..
1404	Mexico	MEX	Pupil-teacher ratio, tertiary	SE.TER.ENRL.TC.ZS	2016-07-01	201607	9.18651	9.13675	9.236	..	..	..
1405	Malawi	MWI	Technicians in R&D (per million people)	SP.POP.TECH.RD.P6	2016-07-01	201607	59.0731	..	..	..	..	..
1406	Malawi	MWI	Technicians in research and development (per million people)	SP.POP.TECH.RD	2016-07-01	201607	..	..	..	..	..	..
1407	Malawi	MWI	Fixed broadband Internet subscribers (per 100 people)	IT.NET.BBND.P2	2016-07-01	201607	0.00722674	0.011192	0.00778299	0.0536407	0.0508701	..
1408	Malawi	MWI	International Internet bandwidth (bits per second per Internet user)	IT.NET.BNDW.PC	2016-07-01	201607	..	..	..	..	..	..
1409	Malawi	MWI	International Internet bandwidth (Mbps)	IT.NET.BNDW	2016-07-01	201607	..	..	..	..	..	..
1410	Malawi	MWI	Internet hosts (per 10,000 people)	IT.NET.HOST.P4	2016-07-01	201607	..	..	..	..	..	..
1411	Malawi	MWI	Internet users (per 1,000 people)	IT.NET.USER.P3	2016-07-01	201607	..	..	..	..	..	..
1412	Malawi	MWI	Schools connected to the Internet (%)	IT.NET.EDUC.ZS	2016-07-01	201607	..	..	..	..	..	..
1413	Malawi	MWI	Secure Internet servers (per 1 million people)	IT.NET.SECR.P6	2016-07-01	201607	0.270822	0.394042	0.891695	0.926491	1.13805	1.33603
1414	Malawi	MWI	Information and communication technology expenditure per capita (current US$)	IE.ICT.PCAP.CD	2016-07-01	201607	..	..	..	..	..	..
1415	Malawi	MWI	Researchers in R&D (per million people)	SP.POP.SCIE.RD.P6	2016-07-01	201607	49.5673	..	..	..	..	..
1416	Malawi	MWI	Scientists and engineers in research and dev. (per million people)	SP.POP.SCIE.RD	2016-07-01	201607	..	..	..	..	..	..
1417	Malawi	MWI	Pupil-teacher ratio, tertiary	SE.TER.ENRL.TC.ZS	2016-07-01	201607	11.6208	13.6042	..	..	..	..
1418	Macedonia	MKD	Technicians in R&D (per million people)	SP.POP.TECH.RD.P6	2016-07-01	201607	82.2811	59.7661	109.58	53.4078	..	..
1419	Macedonia	MKD	Technicians in research and development (per million people)	SP.POP.TECH.RD	2016-07-01	201607	..	..	..	..	..	..
1420	Macedonia	MKD	Fixed broadband Internet subscribers (per 100 people)	IT.NET.BBND.P2	2016-07-01	201607	12.308	13.3831	14.8307	16.0636	16.7942	..
1421	Macedonia	MKD	International Internet bandwidth (bits per second per Internet user)	IT.NET.BNDW.PC	2016-07-01	201607	..	..	..	..	..	..
1422	Macedonia	MKD	International Internet bandwidth (Mbps)	IT.NET.BNDW	2016-07-01	201607	..	..	..	..	..	..
1423	Macedonia	MKD	Internet hosts (per 10,000 people)	IT.NET.HOST.P4	2016-07-01	201607	..	..	..	..	..	..
1424	Macedonia	MKD	Internet users (per 1,000 people)	IT.NET.USER.P3	2016-07-01	201607	..	..	..	..	..	..
1425	Macedonia	MKD	Schools connected to the Internet (%)	IT.NET.EDUC.ZS	2016-07-01	201607	..	..	..	..	..	..
1426	Macedonia	MKD	Secure Internet servers (per 1 million people)	IT.NET.SECR.P6	2016-07-01	201607	24.2431	28.5591	40.1108	52.5924	76.6034	91.4141
1427	Macedonia	MKD	Information and communication technology expenditure per capita (current US$)	IE.ICT.PCAP.CD	2016-07-01	201607	..	..	..	..	..	..
1428	Macedonia	MKD	Researchers in R&D (per million people)	SP.POP.SCIE.RD.P6	2016-07-01	201607	534.269	446.646	613.26	676.425	..	..
1429	Macedonia	MKD	Scientists and engineers in research and dev. (per million people)	SP.POP.SCIE.RD	2016-07-01	201607	..	..	..	..	..	..
1430	Macedonia	MKD	Pupil-teacher ratio, tertiary	SE.TER.ENRL.TC.ZS	2016-07-01	201607	17.8302	..	17.2905	17.6915	..	..
1431	Luxembourg	LUX	Technicians in R&D (per million people)	SP.POP.TECH.RD.P6	2016-07-01	201607	3345.22	..	..	..	..	..
1432	Luxembourg	LUX	Technicians in research and development (per million people)	SP.POP.TECH.RD	2016-07-01	201607	..	..	..	..	..	..
1433	Luxembourg	LUX	Fixed broadband Internet subscribers (per 100 people)	IT.NET.BBND.P2	2016-07-01	201607	33.1508	32.8757	32.4013	33.278	34.8013	..
1434	Luxembourg	LUX	International Internet bandwidth (bits per second per Internet user)	IT.NET.BNDW.PC	2016-07-01	201607	..	..	..	..	..	..
1435	Luxembourg	LUX	International Internet bandwidth (Mbps)	IT.NET.BNDW	2016-07-01	201607	..	..	..	..	..	..
1436	Luxembourg	LUX	Internet hosts (per 10,000 people)	IT.NET.HOST.P4	2016-07-01	201607	..	..	..	..	..	..
1437	Luxembourg	LUX	Internet users (per 1,000 people)	IT.NET.USER.P3	2016-07-01	201607	..	..	..	..	..	..
1438	Luxembourg	LUX	Schools connected to the Internet (%)	IT.NET.EDUC.ZS	2016-07-01	201607	..	..	..	..	..	..
1439	Luxembourg	LUX	Secure Internet servers (per 1 million people)	IT.NET.SECR.P6	2016-07-01	201607	1412.36	1869.4	1985.14	2190.08	2644.17	2913.94
1440	Luxembourg	LUX	Information and communication technology expenditure per capita (current US$)	IE.ICT.PCAP.CD	2016-07-01	201607	..	..	..	..	..	..
1441	Luxembourg	LUX	Researchers in R&D (per million people)	SP.POP.SCIE.RD.P6	2016-07-01	201607	5190.11	5829.06	4677.37	4799.54	..	..
1442	Luxembourg	LUX	Scientists and engineers in research and dev. (per million people)	SP.POP.SCIE.RD	2016-07-01	201607	..	..	..	..	..	..
1443	Luxembourg	LUX	Pupil-teacher ratio, tertiary	SE.TER.ENRL.TC.ZS	2016-07-01	201607	5.35458	..	3.75849	..	..	..
1444	Lithuania	LTU	Technicians in R&D (per million people)	SP.POP.TECH.RD.P6	2016-07-01	201607	541.495	464.405	..	..	..	..
1445	Lithuania	LTU	Technicians in research and development (per million people)	SP.POP.TECH.RD	2016-07-01	201607	..	..	..	..	..	..
1446	Lithuania	LTU	Fixed broadband Internet subscribers (per 100 people)	IT.NET.BBND.P2	2016-07-01	201607	22.1388	23.9062	25.3949	27.7169	26.6551	..
1447	Lithuania	LTU	International Internet bandwidth (bits per second per Internet user)	IT.NET.BNDW.PC	2016-07-01	201607	..	..	..	..	..	..
1448	Lithuania	LTU	International Internet bandwidth (Mbps)	IT.NET.BNDW	2016-07-01	201607	..	..	..	..	..	..
1449	Lithuania	LTU	Internet hosts (per 10,000 people)	IT.NET.HOST.P4	2016-07-01	201607	..	..	..	..	..	..
1450	Lithuania	LTU	Internet users (per 1,000 people)	IT.NET.USER.P3	2016-07-01	201607	..	..	..	..	..	..
1451	Lithuania	LTU	Schools connected to the Internet (%)	IT.NET.EDUC.ZS	2016-07-01	201607	..	..	..	..	..	..
1452	Lithuania	LTU	Secure Internet servers (per 1 million people)	IT.NET.SECR.P6	2016-07-01	201607	188.552	255.935	272.778	256.619	206.659	243.626
1453	Lithuania	LTU	Information and communication technology expenditure per capita (current US$)	IE.ICT.PCAP.CD	2016-07-01	201607	..	..	..	..	..	..
1454	Lithuania	LTU	Researchers in R&D (per million people)	SP.POP.SCIE.RD.P6	2016-07-01	201607	2753.59	2732.37	2659.71	2887.16	..	..
1455	Lithuania	LTU	Scientists and engineers in research and dev. (per million people)	SP.POP.SCIE.RD	2016-07-01	201607	..	..	..	..	..	..
1456	Lithuania	LTU	Pupil-teacher ratio, tertiary	SE.TER.ENRL.TC.ZS	2016-07-01	201607	14.2656	13.4365	12.5739	11.7139	..	..
1457	Lesotho	LSO	Technicians in R&D (per million people)	SP.POP.TECH.RD.P6	2016-07-01	201607	..	0.88541	..	..	..	..
1458	Lesotho	LSO	Technicians in research and development (per million people)	SP.POP.TECH.RD	2016-07-01	201607	..	..	..	..	..	..
1459	Lesotho	LSO	Fixed broadband Internet subscribers (per 100 people)	IT.NET.BBND.P2	2016-07-01	201607	0.0199112	0.0659763	0.0797448	0.109667	0.0716087	..
1460	Lesotho	LSO	International Internet bandwidth (bits per second per Internet user)	IT.NET.BNDW.PC	2016-07-01	201607	..	..	..	..	..	..
1461	Lesotho	LSO	International Internet bandwidth (Mbps)	IT.NET.BNDW	2016-07-01	201607	..	..	..	..	..	..
1462	Lesotho	LSO	Internet hosts (per 10,000 people)	IT.NET.HOST.P4	2016-07-01	201607	..	..	..	..	..	..
1463	Lesotho	LSO	Internet users (per 1,000 people)	IT.NET.USER.P3	2016-07-01	201607	..	..	..	..	..	..
1464	Lesotho	LSO	Schools connected to the Internet (%)	IT.NET.EDUC.ZS	2016-07-01	201607	..	..	..	..	..	..
1465	Lesotho	LSO	Secure Internet servers (per 1 million people)	IT.NET.SECR.P6	2016-07-01	201607	0.497367	..	..	0.480063	1.42234	4.21541
1466	Lesotho	LSO	Information and communication technology expenditure per capita (current US$)	IE.ICT.PCAP.CD	2016-07-01	201607	..	..	..	..	..	..
1467	Lesotho	LSO	Researchers in R&D (per million people)	SP.POP.SCIE.RD.P6	2016-07-01	201607	..	5.85356	..	..	..	..
1468	Lesotho	LSO	Scientists and engineers in research and dev. (per million people)	SP.POP.SCIE.RD	2016-07-01	201607	..	..	..	..	..	..
1469	Lesotho	LSO	Pupil-teacher ratio, tertiary	SE.TER.ENRL.TC.ZS	2016-07-01	201607	..	..	29.7284	24.4148	29.2848	..
1470	Latvia	LVA	Technicians in R&D (per million people)	SP.POP.TECH.RD.P6	2016-07-01	201607	437.69	396.868	..	..	..	..
1471	Latvia	LVA	Technicians in research and development (per million people)	SP.POP.TECH.RD	2016-07-01	201607	..	..	..	..	..	..
1472	Latvia	LVA	Fixed broadband Internet subscribers (per 100 people)	IT.NET.BBND.P2	2016-07-01	201607	20.8023	22.0616	23.1088	24.1914	24.7414	..
1473	Latvia	LVA	International Internet bandwidth (bits per second per Internet user)	IT.NET.BNDW.PC	2016-07-01	201607	..	..	..	..	..	..
1474	Latvia	LVA	International Internet bandwidth (Mbps)	IT.NET.BNDW	2016-07-01	201607	..	..	..	..	..	..
1475	Latvia	LVA	Internet hosts (per 10,000 people)	IT.NET.HOST.P4	2016-07-01	201607	..	..	..	..	..	..
1476	Latvia	LVA	Internet users (per 1,000 people)	IT.NET.USER.P3	2016-07-01	201607	..	..	..	..	..	..
1477	Latvia	LVA	Schools connected to the Internet (%)	IT.NET.EDUC.ZS	2016-07-01	201607	..	..	..	..	..	..
1478	Latvia	LVA	Secure Internet servers (per 1 million people)	IT.NET.SECR.P6	2016-07-01	201607	184.977	221.876	273.31	272.278	360.12	456.42
1479	Latvia	LVA	Information and communication technology expenditure per capita (current US$)	IE.ICT.PCAP.CD	2016-07-01	201607	..	..	..	..	..	..
1480	Latvia	LVA	Researchers in R&D (per million people)	SP.POP.SCIE.RD.P6	2016-07-01	201607	1863.65	1912.62	1916.46	1801.82	..	..
1481	Latvia	LVA	Scientists and engineers in research and dev. (per million people)	SP.POP.SCIE.RD	2016-07-01	201607	..	..	..	..	..	..
1482	Latvia	LVA	Pupil-teacher ratio, tertiary	SE.TER.ENRL.TC.ZS	2016-07-01	201607	16.2575	16.3811	15.0802	14.2237	..	..
1483	Lao PDR	LAO	Technicians in R&D (per million people)	SP.POP.TECH.RD.P6	2016-07-01	201607	..	..	..	..	..	..
1484	Lao PDR	LAO	Technicians in research and development (per million people)	SP.POP.TECH.RD	2016-07-01	201607	..	..	..	..	..	..
1485	Lao PDR	LAO	Fixed broadband Internet subscribers (per 100 people)	IT.NET.BBND.P2	2016-07-01	201607	0.0920148	0.100379	0.114026	0.133314	0.16372	..
1486	Lao PDR	LAO	International Internet bandwidth (bits per second per Internet user)	IT.NET.BNDW.PC	2016-07-01	201607	..	..	..	..	..	..
1487	Lao PDR	LAO	International Internet bandwidth (Mbps)	IT.NET.BNDW	2016-07-01	201607	..	..	..	..	..	..
1488	Lao PDR	LAO	Internet hosts (per 10,000 people)	IT.NET.HOST.P4	2016-07-01	201607	..	..	..	..	..	..
1489	Lao PDR	LAO	Internet users (per 1,000 people)	IT.NET.USER.P3	2016-07-01	201607	..	..	..	..	..	..
1490	Lao PDR	LAO	Schools connected to the Internet (%)	IT.NET.EDUC.ZS	2016-07-01	201607	..	..	..	..	..	..
1491	Lao PDR	LAO	Secure Internet servers (per 1 million people)	IT.NET.SECR.P6	2016-07-01	201607	0.798653	1.2565	0.92692	1.06383	2.09289	2.49926
1492	Lao PDR	LAO	Information and communication technology expenditure per capita (current US$)	IE.ICT.PCAP.CD	2016-07-01	201607	..	..	..	..	..	..
1493	Lao PDR	LAO	Researchers in R&D (per million people)	SP.POP.SCIE.RD.P6	2016-07-01	201607	..	..	..	..	..	..
1494	Lao PDR	LAO	Scientists and engineers in research and dev. (per million people)	SP.POP.SCIE.RD	2016-07-01	201607	..	..	..	..	..	..
1495	Lao PDR	LAO	Pupil-teacher ratio, tertiary	SE.TER.ENRL.TC.ZS	2016-07-01	201607	22.4596	19.1421	..	12.3763	13.3922	..
1496	Korea	KOR	Technicians in R&D (per million people)	SP.POP.TECH.RD.P6	2016-07-01	201607	968.762	1051.47	1163.4	1167.72	..	..
1497	Korea	KOR	Technicians in research and development (per million people)	SP.POP.TECH.RD	2016-07-01	201607	..	..	..	..	..	..
1498	Korea	KOR	Fixed broadband Internet subscribers (per 100 people)	IT.NET.BBND.P2	2016-07-01	201607	35.4858	36.648	37.2483	38.0359	38.7763	..
1499	Korea	KOR	International Internet bandwidth (bits per second per Internet user)	IT.NET.BNDW.PC	2016-07-01	201607	..	..	..	..	..	..
1500	Korea	KOR	International Internet bandwidth (Mbps)	IT.NET.BNDW	2016-07-01	201607	..	..	..	..	..	..
1501	Korea	KOR	Internet hosts (per 10,000 people)	IT.NET.HOST.P4	2016-07-01	201607	..	..	..	..	..	..
1502	Korea	KOR	Internet users (per 1,000 people)	IT.NET.USER.P3	2016-07-01	201607	..	..	..	..	..	..
1503	Korea	KOR	Schools connected to the Internet (%)	IT.NET.EDUC.ZS	2016-07-01	201607	..	..	..	..	..	..
1504	Korea	KOR	Secure Internet servers (per 1 million people)	IT.NET.SECR.P6	2016-07-01	201607	1128.08	2496.11	2751.54	1994.9	2178.35	2319.55
1505	Korea	KOR	Information and communication technology expenditure per capita (current US$)	IE.ICT.PCAP.CD	2016-07-01	201607	..	..	..	..	..	..
1506	Korea	KOR	Researchers in R&D (per million people)	SP.POP.SCIE.RD.P6	2016-07-01	201607	5380.28	5853.33	6361.6	6456.63	..	..
1507	Korea	KOR	Scientists and engineers in research and dev. (per million people)	SP.POP.SCIE.RD	2016-07-01	201607	..	..	..	..	..	..
1508	Korea	KOR	Pupil-teacher ratio, tertiary	SE.TER.ENRL.TC.ZS	2016-07-01	201607	14.6928	14.5883	..	14.6036	14.6623	..
1509	Kenya	KEN	Technicians in R&D (per million people)	SP.POP.TECH.RD.P6	2016-07-01	201607	654.23	..	..	..	..	..
1510	Kenya	KEN	Technicians in research and development (per million people)	SP.POP.TECH.RD	2016-07-01	201607	..	..	..	..	..	..
1511	Kenya	KEN	Fixed broadband Internet subscribers (per 100 people)	IT.NET.BBND.P2	2016-07-01	201607	0.0167835	0.128829	0.125869	0.167165	0.185814	..
1512	Kenya	KEN	International Internet bandwidth (bits per second per Internet user)	IT.NET.BNDW.PC	2016-07-01	201607	..	..	..	..	..	..
1513	Kenya	KEN	International Internet bandwidth (Mbps)	IT.NET.BNDW	2016-07-01	201607	..	..	..	..	..	..
1514	Kenya	KEN	Internet hosts (per 10,000 people)	IT.NET.HOST.P4	2016-07-01	201607	..	..	..	..	..	..
1515	Kenya	KEN	Internet users (per 1,000 people)	IT.NET.USER.P3	2016-07-01	201607	..	..	..	..	..	..
1516	Kenya	KEN	Schools connected to the Internet (%)	IT.NET.EDUC.ZS	2016-07-01	201607	..	..	..	..	..	..
1517	Kenya	KEN	Secure Internet servers (per 1 million people)	IT.NET.SECR.P6	2016-07-01	201607	2.60363	3.18687	4.23102	4.85205	7.80143	9.14218
1518	Kenya	KEN	Information and communication technology expenditure per capita (current US$)	IE.ICT.PCAP.CD	2016-07-01	201607	..	..	..	..	..	..
1519	Kenya	KEN	Researchers in R&D (per million people)	SP.POP.SCIE.RD.P6	2016-07-01	201607	230.731	..	..	..	..	..
1520	Kenya	KEN	Scientists and engineers in research and dev. (per million people)	SP.POP.SCIE.RD	2016-07-01	201607	..	..	..	..	..	..
1521	Kenya	KEN	Pupil-teacher ratio, tertiary	SE.TER.ENRL.TC.ZS	2016-07-01	201607	..	..	..	..	..	..
1522	High income	HIC	Technicians in R&D (per million people)	SP.POP.TECH.RD.P6	2016-07-01	201607	..	..	..	..	..	..
1523	High income	HIC	Technicians in research and development (per million people)	SP.POP.TECH.RD	2016-07-01	201607	..	..	..	..	..	..
1524	High income	HIC	Fixed broadband Internet subscribers (per 100 people)	IT.NET.BBND.P2	2016-07-01	201607	26.2906	27.4809	28.4263	29.3686	30.6221	..
1525	High income	HIC	International Internet bandwidth (bits per second per Internet user)	IT.NET.BNDW.PC	2016-07-01	201607	..	..	..	..	..	..
1526	High income	HIC	International Internet bandwidth (Mbps)	IT.NET.BNDW	2016-07-01	201607	..	..	..	..	..	..
1527	High income	HIC	Internet hosts (per 10,000 people)	IT.NET.HOST.P4	2016-07-01	201607	..	..	..	..	..	..
1528	High income	HIC	Internet users (per 1,000 people)	IT.NET.USER.P3	2016-07-01	201607	..	..	..	..	..	..
1529	High income	HIC	Schools connected to the Internet (%)	IT.NET.EDUC.ZS	2016-07-01	201607	..	..	..	..	..	..
1530	High income	HIC	Secure Internet servers (per 1 million people)	IT.NET.SECR.P6	2016-07-01	201607	882.423	1045.8	1036.86	915.487	1087.09	1194.62
1531	High income	HIC	Information and communication technology expenditure per capita (current US$)	IE.ICT.PCAP.CD	2016-07-01	201607	..	..	..	..	..	..
1532	High income	HIC	Researchers in R&D (per million people)	SP.POP.SCIE.RD.P6	2016-07-01	201607	3816.16	3902.13	3962.51	..	..	..
1533	High income	HIC	Scientists and engineers in research and dev. (per million people)	SP.POP.SCIE.RD	2016-07-01	201607	..	..	..	..	..	..
1534	High income	HIC	Pupil-teacher ratio, tertiary	SE.TER.ENRL.TC.ZS	2016-07-01	201607	..	..	..	..	..	..
1535	Guatemala	GTM	Technicians in R&D (per million people)	SP.POP.TECH.RD.P6	2016-07-01	201607	18.5308	14.22	17.9585	..	..	..
1536	Guatemala	GTM	Technicians in research and development (per million people)	SP.POP.TECH.RD	2016-07-01	201607	..	..	..	..	..	..
1537	Guatemala	GTM	Fixed broadband Internet subscribers (per 100 people)	IT.NET.BBND.P2	2016-07-01	201607	1.80594	..	1.85842	2.28098	2.73482	..
1538	Guatemala	GTM	International Internet bandwidth (bits per second per Internet user)	IT.NET.BNDW.PC	2016-07-01	201607	..	..	..	..	..	..
1539	Guatemala	GTM	International Internet bandwidth (Mbps)	IT.NET.BNDW	2016-07-01	201607	..	..	..	..	..	..
1540	Guatemala	GTM	Internet hosts (per 10,000 people)	IT.NET.HOST.P4	2016-07-01	201607	..	..	..	..	..	..
1541	Guatemala	GTM	Internet users (per 1,000 people)	IT.NET.USER.P3	2016-07-01	201607	..	..	..	..	..	..
1542	Guatemala	GTM	Schools connected to the Internet (%)	IT.NET.EDUC.ZS	2016-07-01	201607	..	..	..	..	..	..
1543	Guatemala	GTM	Secure Internet servers (per 1 million people)	IT.NET.SECR.P6	2016-07-01	201607	9.70659	13.5555	13.8593	13.1287	17.5455	20.743
1544	Guatemala	GTM	Information and communication technology expenditure per capita (current US$)	IE.ICT.PCAP.CD	2016-07-01	201607	..	..	..	..	..	..
1545	Guatemala	GTM	Researchers in R&D (per million people)	SP.POP.SCIE.RD.P6	2016-07-01	201607	24.6398	24.5859	26.7426	..	..	..
1546	Guatemala	GTM	Scientists and engineers in research and dev. (per million people)	SP.POP.SCIE.RD	2016-07-01	201607	..	..	..	..	..	..
1547	Guatemala	GTM	Pupil-teacher ratio, tertiary	SE.TER.ENRL.TC.ZS	2016-07-01	201607	..	..	..	..	..	..
1548	Guinea-Bissau	GNB	Technicians in R&D (per million people)	SP.POP.TECH.RD.P6	2016-07-01	201607	..	..	..	..	..	..
1549	Guinea-Bissau	GNB	Technicians in research and development (per million people)	SP.POP.TECH.RD	2016-07-01	201607	..	..	..	..	..	..
1550	Guinea-Bissau	GNB	Fixed broadband Internet subscribers (per 100 people)	IT.NET.BBND.P2	2016-07-01	201607	0.0504215	0.0615677	0.0723149	0.0851985	0.0799062	..
1551	Guinea-Bissau	GNB	International Internet bandwidth (bits per second per Internet user)	IT.NET.BNDW.PC	2016-07-01	201607	..	..	..	..	..	..
1552	Guinea-Bissau	GNB	International Internet bandwidth (Mbps)	IT.NET.BNDW	2016-07-01	201607	..	..	..	..	..	..
1553	Guinea-Bissau	GNB	Internet hosts (per 10,000 people)	IT.NET.HOST.P4	2016-07-01	201607	..	..	..	..	..	..
1554	Guinea-Bissau	GNB	Internet users (per 1,000 people)	IT.NET.USER.P3	2016-07-01	201607	..	..	..	..	..	..
1555	Guinea-Bissau	GNB	Schools connected to the Internet (%)	IT.NET.EDUC.ZS	2016-07-01	201607	..	..	..	..	..	..
1556	Guinea-Bissau	GNB	Secure Internet servers (per 1 million people)	IT.NET.SECR.P6	2016-07-01	201607	0.611922	0.597547	1.16644	1.13821	1.11079	1.62661
1557	Guinea-Bissau	GNB	Information and communication technology expenditure per capita (current US$)	IE.ICT.PCAP.CD	2016-07-01	201607	..	..	..	..	..	..
1558	Guinea-Bissau	GNB	Researchers in R&D (per million people)	SP.POP.SCIE.RD.P6	2016-07-01	201607	..	..	..	..	..	..
1559	Guinea-Bissau	GNB	Scientists and engineers in research and dev. (per million people)	SP.POP.SCIE.RD	2016-07-01	201607	..	..	..	..	..	..
1560	Guinea-Bissau	GNB	Pupil-teacher ratio, tertiary	SE.TER.ENRL.TC.ZS	2016-07-01	201607	..	..	..	..	..	..
1561	Germany	DEU	Technicians in R&D (per million people)	SP.POP.TECH.RD.P6	2016-07-01	201607	1407.48	1734.73	1743.9	..	..	..
1562	Germany	DEU	Technicians in research and development (per million people)	SP.POP.TECH.RD	2016-07-01	201607	..	..	..	..	..	..
1563	Germany	DEU	Fixed broadband Internet subscribers (per 100 people)	IT.NET.BBND.P2	2016-07-01	201607	31.5138	32.8823	33.7641	34.6224	35.7798	..
1564	Germany	DEU	International Internet bandwidth (bits per second per Internet user)	IT.NET.BNDW.PC	2016-07-01	201607	..	..	..	..	..	..
1565	Germany	DEU	International Internet bandwidth (Mbps)	IT.NET.BNDW	2016-07-01	201607	..	..	..	..	..	..
1566	Germany	DEU	Internet hosts (per 10,000 people)	IT.NET.HOST.P4	2016-07-01	201607	..	..	..	..	..	..
1567	Germany	DEU	Internet users (per 1,000 people)	IT.NET.USER.P3	2016-07-01	201607	..	..	..	..	..	..
1568	Germany	DEU	Schools connected to the Internet (%)	IT.NET.EDUC.ZS	2016-07-01	201607	..	..	..	..	..	..
1569	Germany	DEU	Secure Internet servers (per 1 million people)	IT.NET.SECR.P6	2016-07-01	201607	872.031	1022.51	1110.78	1051.22	1418.39	1762.74
1570	Germany	DEU	Information and communication technology expenditure per capita (current US$)	IE.ICT.PCAP.CD	2016-07-01	201607	..	..	..	..	..	..
1571	Germany	DEU	Researchers in R&D (per million people)	SP.POP.SCIE.RD.P6	2016-07-01	201607	4077.77	4211.25	4379.08	4472.24	..	..
1572	Germany	DEU	Scientists and engineers in research and dev. (per million people)	SP.POP.SCIE.RD	2016-07-01	201607	..	..	..	..	..	..
1573	Germany	DEU	Pupil-teacher ratio, tertiary	SE.TER.ENRL.TC.ZS	2016-07-01	201607	..	..	..	7.51864	..	..
1574	France	FRA	Technicians in R&D (per million people)	SP.POP.TECH.RD.P6	2016-07-01	201607	1879.95	1875.04	1875.4	1902.1	..	..
1575	France	FRA	Technicians in research and development (per million people)	SP.POP.TECH.RD	2016-07-01	201607	..	..	..	..	..	..
1576	France	FRA	Fixed broadband Internet subscribers (per 100 people)	IT.NET.BBND.P2	2016-07-01	201607	33.7446	35.7789	37.5059	38.7922	40.174	..
1577	France	FRA	International Internet bandwidth (bits per second per Internet user)	IT.NET.BNDW.PC	2016-07-01	201607	..	..	..	..	..	..
1578	France	FRA	International Internet bandwidth (Mbps)	IT.NET.BNDW	2016-07-01	201607	..	..	..	..	..	..
1579	France	FRA	Internet hosts (per 10,000 people)	IT.NET.HOST.P4	2016-07-01	201607	..	..	..	..	..	..
1580	France	FRA	Internet users (per 1,000 people)	IT.NET.USER.P3	2016-07-01	201607	..	..	..	..	..	..
1581	France	FRA	Schools connected to the Internet (%)	IT.NET.EDUC.ZS	2016-07-01	201607	..	..	..	..	..	..
1582	France	FRA	Secure Internet servers (per 1 million people)	IT.NET.SECR.P6	2016-07-01	201607	296.413	354.607	409.185	486.539	680.478	809.315
1583	France	FRA	Information and communication technology expenditure per capita (current US$)	IE.ICT.PCAP.CD	2016-07-01	201607	..	..	..	..	..	..
1584	France	FRA	Researchers in R&D (per million people)	SP.POP.SCIE.RD.P6	2016-07-01	201607	3867.99	3939.51	4075.81	4153.48	..	..
1585	France	FRA	Scientists and engineers in research and dev. (per million people)	SP.POP.SCIE.RD	2016-07-01	201607	..	..	..	..	..	..
1586	France	FRA	Pupil-teacher ratio, tertiary	SE.TER.ENRL.TC.ZS	2016-07-01	201607	..	..	19.8795	21.2892	..	..
1587	Finland	FIN	Technicians in R&D (per million people)	SP.POP.TECH.RD.P6	2016-07-01	201607	..	..	..	..	..	..
1588	Finland	FIN	Technicians in research and development (per million people)	SP.POP.TECH.RD	2016-07-01	201607	..	..	..	..	..	..
1589	Finland	FIN	Fixed broadband Internet subscribers (per 100 people)	IT.NET.BBND.P2	2016-07-01	201607	29.0516	29.801	30.4634	31.701	32.3046	..
1590	Finland	FIN	International Internet bandwidth (bits per second per Internet user)	IT.NET.BNDW.PC	2016-07-01	201607	..	..	..	..	..	..
1591	Finland	FIN	International Internet bandwidth (Mbps)	IT.NET.BNDW	2016-07-01	201607	..	..	..	..	..	..
1592	Finland	FIN	Internet hosts (per 10,000 people)	IT.NET.HOST.P4	2016-07-01	201607	..	..	..	..	..	..
1593	Finland	FIN	Internet users (per 1,000 people)	IT.NET.USER.P3	2016-07-01	201607	..	..	..	..	..	..
1594	Finland	FIN	Schools connected to the Internet (%)	IT.NET.EDUC.ZS	2016-07-01	201607	..	..	..	..	..	..
1595	Finland	FIN	Secure Internet servers (per 1 million people)	IT.NET.SECR.P6	2016-07-01	201607	1245.49	1486.38	1612.68	1546.98	1791.99	1781.64
1596	Finland	FIN	Information and communication technology expenditure per capita (current US$)	IE.ICT.PCAP.CD	2016-07-01	201607	..	..	..	..	..	..
1597	Finland	FIN	Researchers in R&D (per million people)	SP.POP.SCIE.RD.P6	2016-07-01	201607	7717.47	7413.63	7460.1	7187.93	..	..
1598	Finland	FIN	Scientists and engineers in research and dev. (per million people)	SP.POP.SCIE.RD	2016-07-01	201607	..	..	..	..	..	..
1599	Finland	FIN	Pupil-teacher ratio, tertiary	SE.TER.ENRL.TC.ZS	2016-07-01	201607	19.6934	18.7097	19.1119	18.9193	..	..
1600	Gambia, The	GMB	Technicians in R&D (per million people)	SP.POP.TECH.RD.P6	2016-07-01	201607	..	421.36	..	..	..	..
1601	Gambia, The	GMB	Technicians in research and development (per million people)	SP.POP.TECH.RD	2016-07-01	201607	..	..	..	..	..	..
1602	Gambia, The	GMB	Fixed broadband Internet subscribers (per 100 people)	IT.NET.BBND.P2	2016-07-01	201607	0.0208254	0.0251878	0.0279139	0.0236848	0.143691	..
1603	Gambia, The	GMB	International Internet bandwidth (bits per second per Internet user)	IT.NET.BNDW.PC	2016-07-01	201607	..	..	..	..	..	..
1604	Gambia, The	GMB	International Internet bandwidth (Mbps)	IT.NET.BNDW	2016-07-01	201607	..	..	..	..	..	..
1605	Gambia, The	GMB	Internet hosts (per 10,000 people)	IT.NET.HOST.P4	2016-07-01	201607	..	..	..	..	..	..
1606	Gambia, The	GMB	Internet users (per 1,000 people)	IT.NET.USER.P3	2016-07-01	201607	..	..	..	..	..	..
1607	Gambia, The	GMB	Schools connected to the Internet (%)	IT.NET.EDUC.ZS	2016-07-01	201607	..	..	..	..	..	..
1608	Gambia, The	GMB	Secure Internet servers (per 1 million people)	IT.NET.SECR.P6	2016-07-01	201607	2.95333	2.85861	3.87359	4.28523	5.7048	5.52507
1609	Gambia, The	GMB	Information and communication technology expenditure per capita (current US$)	IE.ICT.PCAP.CD	2016-07-01	201607	..	..	..	..	..	..
1610	Gambia, The	GMB	Researchers in R&D (per million people)	SP.POP.SCIE.RD.P6	2016-07-01	201607	..	33.503	..	..	..	..
1611	Gambia, The	GMB	Scientists and engineers in research and dev. (per million people)	SP.POP.SCIE.RD	2016-07-01	201607	..	..	..	..	..	..
1612	Gambia, The	GMB	Pupil-teacher ratio, tertiary	SE.TER.ENRL.TC.ZS	2016-07-01	201607	..	..	..	..	..	..
1613	Ethiopia	ETH	Technicians in R&D (per million people)	SP.POP.TECH.RD.P6	2016-07-01	201607	16.4569	..	..	33.3826	..	..
1614	Ethiopia	ETH	Technicians in research and development (per million people)	SP.POP.TECH.RD	2016-07-01	201607	..	..	..	..	..	..
1615	Ethiopia	ETH	Fixed broadband Internet subscribers (per 100 people)	IT.NET.BBND.P2	2016-07-01	201607	0.00471553	0.00710682	0.0093046	0.252992	0.488348	..
1616	Ethiopia	ETH	International Internet bandwidth (bits per second per Internet user)	IT.NET.BNDW.PC	2016-07-01	201607	..	..	..	..	..	..
1617	Ethiopia	ETH	International Internet bandwidth (Mbps)	IT.NET.BNDW	2016-07-01	201607	..	..	..	..	..	..
1618	Ethiopia	ETH	Internet hosts (per 10,000 people)	IT.NET.HOST.P4	2016-07-01	201607	..	..	..	..	..	..
1619	Ethiopia	ETH	Internet users (per 1,000 people)	IT.NET.USER.P3	2016-07-01	201607	..	..	..	..	..	..
1620	Ethiopia	ETH	Schools connected to the Internet (%)	IT.NET.EDUC.ZS	2016-07-01	201607	..	..	..	..	..	..
1621	Ethiopia	ETH	Secure Internet servers (per 1 million people)	IT.NET.SECR.P6	2016-07-01	201607	0.125626	0.166929	0.195246	0.169208	0.226901	0.241471
1622	Ethiopia	ETH	Information and communication technology expenditure per capita (current US$)	IE.ICT.PCAP.CD	2016-07-01	201607	..	..	..	..	..	..
1623	Ethiopia	ETH	Researchers in R&D (per million people)	SP.POP.SCIE.RD.P6	2016-07-01	201607	42.2673	..	..	45.1226	..	..
1624	Ethiopia	ETH	Scientists and engineers in research and dev. (per million people)	SP.POP.SCIE.RD	2016-07-01	201607	..	..	..	..	..	..
1625	Ethiopia	ETH	Pupil-teacher ratio, tertiary	SE.TER.ENRL.TC.ZS	2016-07-01	201607	32.8701	32.6658	30.3342	..	24.2048	..
1626	Eritrea	ERI	Technicians in R&D (per million people)	SP.POP.TECH.RD.P6	2016-07-01	201607	..	..	..	..	..	..
1627	Eritrea	ERI	Technicians in research and development (per million people)	SP.POP.TECH.RD	2016-07-01	201607	..	..	..	..	..	..
1628	Eritrea	ERI	Fixed broadband Internet subscribers (per 100 people)	IT.NET.BBND.P2	2016-07-01	201607	0.00205533	0.0023766	0.00301749	0.00230534	0.00305989	..
1629	Eritrea	ERI	International Internet bandwidth (bits per second per Internet user)	IT.NET.BNDW.PC	2016-07-01	201607	..	..	..	..	..	..
1630	Eritrea	ERI	International Internet bandwidth (Mbps)	IT.NET.BNDW	2016-07-01	201607	..	..	..	..	..	..
1631	Eritrea	ERI	Internet hosts (per 10,000 people)	IT.NET.HOST.P4	2016-07-01	201607	..	..	..	..	..	..
1632	Eritrea	ERI	Internet users (per 1,000 people)	IT.NET.USER.P3	2016-07-01	201607	..	..	..	..	..	..
1633	Eritrea	ERI	Schools connected to the Internet (%)	IT.NET.EDUC.ZS	2016-07-01	201607	..	..	..	..	..	..
1634	Eritrea	ERI	Secure Internet servers (per 1 million people)	IT.NET.SECR.P6	2016-07-01	201607	..	..	..	..	..	..
1635	Eritrea	ERI	Information and communication technology expenditure per capita (current US$)	IE.ICT.PCAP.CD	2016-07-01	201607	..	..	..	..	..	..
1636	Eritrea	ERI	Researchers in R&D (per million people)	SP.POP.SCIE.RD.P6	2016-07-01	201607	..	..	..	..	..	..
1637	Eritrea	ERI	Scientists and engineers in research and dev. (per million people)	SP.POP.SCIE.RD	2016-07-01	201607	..	..	..	..	..	..
1638	Eritrea	ERI	Pupil-teacher ratio, tertiary	SE.TER.ENRL.TC.ZS	2016-07-01	201607	19.1704	..	..	..	20.2484	..
1639	El Salvador	SLV	Technicians in R&D (per million people)	SP.POP.TECH.RD.P6	2016-07-01	201607	..	..	..	..	..	..
1640	El Salvador	SLV	Technicians in research and development (per million people)	SP.POP.TECH.RD	2016-07-01	201607	..	..	..	..	..	..
1641	El Salvador	SLV	Fixed broadband Internet subscribers (per 100 people)	IT.NET.BBND.P2	2016-07-01	201607	2.81873	3.29271	3.84445	4.48592	4.99573	..
1642	El Salvador	SLV	International Internet bandwidth (bits per second per Internet user)	IT.NET.BNDW.PC	2016-07-01	201607	..	..	..	..	..	..
1643	El Salvador	SLV	International Internet bandwidth (Mbps)	IT.NET.BNDW	2016-07-01	201607	..	..	..	..	..	..
1644	El Salvador	SLV	Internet hosts (per 10,000 people)	IT.NET.HOST.P4	2016-07-01	201607	..	..	..	..	..	..
1645	El Salvador	SLV	Internet users (per 1,000 people)	IT.NET.USER.P3	2016-07-01	201607	..	..	..	..	..	..
1646	El Salvador	SLV	Schools connected to the Internet (%)	IT.NET.EDUC.ZS	2016-07-01	201607	..	..	..	..	..	..
1647	El Salvador	SLV	Secure Internet servers (per 1 million people)	IT.NET.SECR.P6	2016-07-01	201607	13.7456	17.3404	21.4089	19.5414	22.1032	25.7893
1648	El Salvador	SLV	Information and communication technology expenditure per capita (current US$)	IE.ICT.PCAP.CD	2016-07-01	201607	..	..	..	..	..	..
1649	El Salvador	SLV	Researchers in R&D (per million people)	SP.POP.SCIE.RD.P6	2016-07-01	201607	..	..	..	..	..	..
1650	El Salvador	SLV	Scientists and engineers in research and dev. (per million people)	SP.POP.SCIE.RD	2016-07-01	201607	..	..	..	..	..	..
1651	El Salvador	SLV	Pupil-teacher ratio, tertiary	SE.TER.ENRL.TC.ZS	2016-07-01	201607	16.4776	17.2612	17.7548	18.9254	..	..
1652	Ecuador	ECU	Technicians in R&D (per million people)	SP.POP.TECH.RD.P6	2016-07-01	201607	68.9072	77.5395	..	..	..	..
1653	Ecuador	ECU	Technicians in research and development (per million people)	SP.POP.TECH.RD	2016-07-01	201607	..	..	..	..	..	..
1654	Ecuador	ECU	Fixed broadband Internet subscribers (per 100 people)	IT.NET.BBND.P2	2016-07-01	201607	1.47536	4.3218	5.44597	6.72551	8.25667	..
1655	Ecuador	ECU	International Internet bandwidth (bits per second per Internet user)	IT.NET.BNDW.PC	2016-07-01	201607	..	..	..	..	..	..
1656	Ecuador	ECU	International Internet bandwidth (Mbps)	IT.NET.BNDW	2016-07-01	201607	..	..	..	..	..	..
1657	Ecuador	ECU	Internet hosts (per 10,000 people)	IT.NET.HOST.P4	2016-07-01	201607	..	..	..	..	..	..
1658	Ecuador	ECU	Internet users (per 1,000 people)	IT.NET.USER.P3	2016-07-01	201607	..	..	..	..	..	..
1659	Ecuador	ECU	Schools connected to the Internet (%)	IT.NET.EDUC.ZS	2016-07-01	201607	..	..	..	..	..	..
1660	Ecuador	ECU	Secure Internet servers (per 1 million people)	IT.NET.SECR.P6	2016-07-01	201607	14.1282	19.0416	22.2446	24.5829	34.4591	41.8722
1661	Ecuador	ECU	Information and communication technology expenditure per capita (current US$)	IE.ICT.PCAP.CD	2016-07-01	201607	..	..	..	..	..	..
1662	Ecuador	ECU	Researchers in R&D (per million people)	SP.POP.SCIE.RD.P6	2016-07-01	201607	141.3	180.295	..	..	..	..
1663	Ecuador	ECU	Scientists and engineers in research and dev. (per million people)	SP.POP.SCIE.RD	2016-07-01	201607	..	..	..	..	..	..
1664	Ecuador	ECU	Pupil-teacher ratio, tertiary	SE.TER.ENRL.TC.ZS	2016-07-01	201607	..	..	14.5468	..	..	..
1665	East Asia & Pacific (all income levels)	EAS	Technicians in R&D (per million people)	SP.POP.TECH.RD.P6	2016-07-01	201607	..	..	..	..	..	..
1666	East Asia & Pacific (all income levels)	EAS	Technicians in research and development (per million people)	SP.POP.TECH.RD	2016-07-01	201607	..	..	..	..	..	..
1667	East Asia & Pacific (all income levels)	EAS	Fixed broadband Internet subscribers (per 100 people)	IT.NET.BBND.P2	2016-07-01	201607	9.37397	11.1673	12.3453	13.2018	14.007	..
1668	East Asia & Pacific (all income levels)	EAS	International Internet bandwidth (bits per second per Internet user)	IT.NET.BNDW.PC	2016-07-01	201607	..	..	..	..	..	..
1669	East Asia & Pacific (all income levels)	EAS	International Internet bandwidth (Mbps)	IT.NET.BNDW	2016-07-01	201607	..	..	..	..	..	..
1670	East Asia & Pacific (all income levels)	EAS	Internet hosts (per 10,000 people)	IT.NET.HOST.P4	2016-07-01	201607	..	..	..	..	..	..
1671	East Asia & Pacific (all income levels)	EAS	Internet users (per 1,000 people)	IT.NET.USER.P3	2016-07-01	201607	..	..	..	..	..	..
1672	East Asia & Pacific (all income levels)	EAS	Schools connected to the Internet (%)	IT.NET.EDUC.ZS	2016-07-01	201607	..	..	..	..	..	..
1673	East Asia & Pacific (all income levels)	EAS	Secure Internet servers (per 1 million people)	IT.NET.SECR.P6	2016-07-01	201607	91.4241	132.446	136.487	112.089	131.488	143.01
1674	East Asia & Pacific (all income levels)	EAS	Information and communication technology expenditure per capita (current US$)	IE.ICT.PCAP.CD	2016-07-01	201607	..	..	..	..	..	..
1675	East Asia & Pacific (all income levels)	EAS	Researchers in R&D (per million people)	SP.POP.SCIE.RD.P6	2016-07-01	201607	1431.88	1480.29	1575.39	1605.69	..	..
1676	East Asia & Pacific (all income levels)	EAS	Scientists and engineers in research and dev. (per million people)	SP.POP.SCIE.RD	2016-07-01	201607	..	..	..	..	..	..
1677	East Asia & Pacific (all income levels)	EAS	Pupil-teacher ratio, tertiary	SE.TER.ENRL.TC.ZS	2016-07-01	201607	..	..	..	..	..	..
1678	Denmark	DNK	Technicians in R&D (per million people)	SP.POP.TECH.RD.P6	2016-07-01	201607	2262.1	2122.99	2069.7	..	..	..
1679	Denmark	DNK	Technicians in research and development (per million people)	SP.POP.TECH.RD	2016-07-01	201607	..	..	..	..	..	..
1680	Denmark	DNK	Fixed broadband Internet subscribers (per 100 people)	IT.NET.BBND.P2	2016-07-01	201607	38.0548	38.4423	38.936	40.4407	41.3446	..
1681	Denmark	DNK	International Internet bandwidth (bits per second per Internet user)	IT.NET.BNDW.PC	2016-07-01	201607	..	..	..	..	..	..
1682	Denmark	DNK	International Internet bandwidth (Mbps)	IT.NET.BNDW	2016-07-01	201607	..	..	..	..	..	..
1683	Denmark	DNK	Internet hosts (per 10,000 people)	IT.NET.HOST.P4	2016-07-01	201607	..	..	..	..	..	..
1684	Denmark	DNK	Internet users (per 1,000 people)	IT.NET.USER.P3	2016-07-01	201607	..	..	..	..	..	..
1685	Denmark	DNK	Schools connected to the Internet (%)	IT.NET.EDUC.ZS	2016-07-01	201607	..	..	..	..	..	..
1686	Denmark	DNK	Secure Internet servers (per 1 million people)	IT.NET.SECR.P6	2016-07-01	201607	1872.13	2182	2213.87	2102.61	2079.39	1975.86
1687	Denmark	DNK	Information and communication technology expenditure per capita (current US$)	IE.ICT.PCAP.CD	2016-07-01	201607	..	..	..	..	..	..
1688	Denmark	DNK	Researchers in R&D (per million people)	SP.POP.SCIE.RD.P6	2016-07-01	201607	6743.9	7025.82	7310.52	7264.56	..	..
1689	Denmark	DNK	Scientists and engineers in research and dev. (per million people)	SP.POP.SCIE.RD	2016-07-01	201607	..	..	..	..	..	..
1690	Denmark	DNK	Pupil-teacher ratio, tertiary	SE.TER.ENRL.TC.ZS	2016-07-01	201607	..	..	..	..	..	..
1691	Czechoslovakia	CSK	Technicians in R&D (per million people)	SP.POP.TECH.RD.P6	2016-07-01	201607	..	..	..	..	..	..
1692	Czechoslovakia	CSK	Technicians in research and development (per million people)	SP.POP.TECH.RD	2016-07-01	201607	..	..	..	..	..	..
1693	Czechoslovakia	CSK	Fixed broadband Internet subscribers (per 100 people)	IT.NET.BBND.P2	2016-07-01	201607	..	..	..	..	..	..
1694	Czechoslovakia	CSK	International Internet bandwidth (bits per second per Internet user)	IT.NET.BNDW.PC	2016-07-01	201607	..	..	..	..	..	..
1695	Czechoslovakia	CSK	International Internet bandwidth (Mbps)	IT.NET.BNDW	2016-07-01	201607	..	..	..	..	..	..
1696	Czechoslovakia	CSK	Internet hosts (per 10,000 people)	IT.NET.HOST.P4	2016-07-01	201607	..	..	..	..	..	..
1697	Czechoslovakia	CSK	Internet users (per 1,000 people)	IT.NET.USER.P3	2016-07-01	201607	..	..	..	..	..	..
1698	Czechoslovakia	CSK	Schools connected to the Internet (%)	IT.NET.EDUC.ZS	2016-07-01	201607	..	..	..	..	..	..
1699	Czechoslovakia	CSK	Secure Internet servers (per 1 million people)	IT.NET.SECR.P6	2016-07-01	201607	..	..	..	..	..	..
1700	Czechoslovakia	CSK	Information and communication technology expenditure per capita (current US$)	IE.ICT.PCAP.CD	2016-07-01	201607	..	..	..	..	..	..
1701	Czechoslovakia	CSK	Researchers in R&D (per million people)	SP.POP.SCIE.RD.P6	2016-07-01	201607	..	..	..	..	..	..
1702	Czechoslovakia	CSK	Scientists and engineers in research and dev. (per million people)	SP.POP.SCIE.RD	2016-07-01	201607	..	..	..	..	..	..
1703	Czechoslovakia	CSK	Pupil-teacher ratio, tertiary	SE.TER.ENRL.TC.ZS	2016-07-01	201607	..	..	..	..	..	..
1704	Cyprus	CYP	Technicians in R&D (per million people)	SP.POP.TECH.RD.P6	2016-07-01	201607	195.708	197.914	181.528	..	..	..
1705	Cyprus	CYP	Technicians in research and development (per million people)	SP.POP.TECH.RD	2016-07-01	201607	..	..	..	..	..	..
1706	Cyprus	CYP	Fixed broadband Internet subscribers (per 100 people)	IT.NET.BBND.P2	2016-07-01	201607	17.6187	19.001	19.5377	20.0843	21.1274	..
1707	Cyprus	CYP	International Internet bandwidth (bits per second per Internet user)	IT.NET.BNDW.PC	2016-07-01	201607	..	..	..	..	..	..
1708	Cyprus	CYP	International Internet bandwidth (Mbps)	IT.NET.BNDW	2016-07-01	201607	..	..	..	..	..	..
1709	Cyprus	CYP	Internet hosts (per 10,000 people)	IT.NET.HOST.P4	2016-07-01	201607	..	..	..	..	..	..
1710	Cyprus	CYP	Internet users (per 1,000 people)	IT.NET.USER.P3	2016-07-01	201607	..	..	..	..	..	..
1711	Cyprus	CYP	Schools connected to the Internet (%)	IT.NET.EDUC.ZS	2016-07-01	201607	..	..	..	..	..	..
1712	Cyprus	CYP	Secure Internet servers (per 1 million people)	IT.NET.SECR.P6	2016-07-01	201607	838.101	1121.22	786.326	621.03	606.766	677.079
1713	Cyprus	CYP	Information and communication technology expenditure per capita (current US$)	IE.ICT.PCAP.CD	2016-07-01	201607	..	..	..	..	..	..
1714	Cyprus	CYP	Researchers in R&D (per million people)	SP.POP.SCIE.RD.P6	2016-07-01	201607	819.98	819.42	776.585	775.192	..	..
1715	Cyprus	CYP	Scientists and engineers in research and dev. (per million people)	SP.POP.SCIE.RD	2016-07-01	201607	..	..	..	..	..	..
1716	Cyprus	CYP	Pupil-teacher ratio, tertiary	SE.TER.ENRL.TC.ZS	2016-07-01	201607	12.6255	12.0337	11.724	11.3391	12.6832	..
1717	Cote d'Ivoire	CIV	Technicians in R&D (per million people)	SP.POP.TECH.RD.P6	2016-07-01	201607	..	..	..	..	..	..
1718	Cote d'Ivoire	CIV	Technicians in research and development (per million people)	SP.POP.TECH.RD	2016-07-01	201607	..	..	..	..	..	..
1719	Cote d'Ivoire	CIV	Fixed broadband Internet subscribers (per 100 people)	IT.NET.BBND.P2	2016-07-01	201607	..	..	0.2327	0.277027	0.609749	..
1720	Cote d'Ivoire	CIV	International Internet bandwidth (bits per second per Internet user)	IT.NET.BNDW.PC	2016-07-01	201607	..	..	..	..	..	..
1721	Cote d'Ivoire	CIV	International Internet bandwidth (Mbps)	IT.NET.BNDW	2016-07-01	201607	..	..	..	..	..	..
1722	Cote d'Ivoire	CIV	Internet hosts (per 10,000 people)	IT.NET.HOST.P4	2016-07-01	201607	..	..	..	..	..	..
1723	Cote d'Ivoire	CIV	Internet users (per 1,000 people)	IT.NET.USER.P3	2016-07-01	201607	..	..	..	..	..	..
1724	Cote d'Ivoire	CIV	Schools connected to the Internet (%)	IT.NET.EDUC.ZS	2016-07-01	201607	..	..	..	..	..	..
1725	Cote d'Ivoire	CIV	Secure Internet servers (per 1 million people)	IT.NET.SECR.P6	2016-07-01	201607	1.04313	0.922143	1.37424	1.84993	2.57254	4.09664
1726	Cote d'Ivoire	CIV	Information and communication technology expenditure per capita (current US$)	IE.ICT.PCAP.CD	2016-07-01	201607	..	..	..	..	..	..
1727	Cote d'Ivoire	CIV	Researchers in R&D (per million people)	SP.POP.SCIE.RD.P6	2016-07-01	201607	..	..	..	..	..	..
1728	Cote d'Ivoire	CIV	Scientists and engineers in research and dev. (per million people)	SP.POP.SCIE.RD	2016-07-01	201607	..	..	..	..	..	..
1729	Cote d'Ivoire	CIV	Pupil-teacher ratio, tertiary	SE.TER.ENRL.TC.ZS	2016-07-01	201607	14.2236	..	..	11.3074	9.05427	..
1730	Congo, Dem. Rep.	ZAR	Technicians in R&D (per million people)	SP.POP.TECH.RD.P6	2016-07-01	201607	..	..	..	..	..	..
1731	Congo, Dem. Rep.	ZAR	Technicians in research and development (per million people)	SP.POP.TECH.RD	2016-07-01	201607	..	..	..	..	..	..
1732	Congo, Dem. Rep.	ZAR	Fixed broadband Internet subscribers (per 100 people)	IT.NET.BBND.P2	2016-07-01	201607	0	..	..	0.000666532	0.000720875	..
1733	Congo, Dem. Rep.	ZAR	International Internet bandwidth (bits per second per Internet user)	IT.NET.BNDW.PC	2016-07-01	201607	..	..	..	..	..	..
1734	Congo, Dem. Rep.	ZAR	International Internet bandwidth (Mbps)	IT.NET.BNDW	2016-07-01	201607	..	..	..	..	..	..
1735	Congo, Dem. Rep.	ZAR	Internet hosts (per 10,000 people)	IT.NET.HOST.P4	2016-07-01	201607	..	..	..	..	..	..
1736	Congo, Dem. Rep.	ZAR	Internet users (per 1,000 people)	IT.NET.USER.P3	2016-07-01	201607	..	..	..	..	..	..
1737	Congo, Dem. Rep.	ZAR	Schools connected to the Internet (%)	IT.NET.EDUC.ZS	2016-07-01	201607	..	..	..	..	..	..
1738	Congo, Dem. Rep.	ZAR	Secure Internet servers (per 1 million people)	IT.NET.SECR.P6	2016-07-01	201607	0.121325	0.176244	0.241851	0.31701	0.400657	0.349439
1739	Congo, Dem. Rep.	ZAR	Information and communication technology expenditure per capita (current US$)	IE.ICT.PCAP.CD	2016-07-01	201607	..	..	..	..	..	..
1740	Congo, Dem. Rep.	ZAR	Researchers in R&D (per million people)	SP.POP.SCIE.RD.P6	2016-07-01	201607	..	..	..	..	..	..
1741	Congo, Dem. Rep.	ZAR	Scientists and engineers in research and dev. (per million people)	SP.POP.SCIE.RD	2016-07-01	201607	..	..	..	..	..	..
1742	Congo, Dem. Rep.	ZAR	Pupil-teacher ratio, tertiary	SE.TER.ENRL.TC.ZS	2016-07-01	201607	..	21.0973	..	15.3402	..	..
1743	Chile	CHL	Technicians in R&D (per million people)	SP.POP.TECH.RD.P6	2016-07-01	201607	229.738	269.155	308.514	..	..	..
1744	Chile	CHL	Technicians in research and development (per million people)	SP.POP.TECH.RD	2016-07-01	201607	..	..	..	..	..	..
1745	Chile	CHL	Fixed broadband Internet subscribers (per 100 people)	IT.NET.BBND.P2	2016-07-01	201607	10.4331	11.62	12.404	13.1134	14.0837	..
1746	Chile	CHL	International Internet bandwidth (bits per second per Internet user)	IT.NET.BNDW.PC	2016-07-01	201607	..	..	..	..	..	..
1747	Chile	CHL	International Internet bandwidth (Mbps)	IT.NET.BNDW	2016-07-01	201607	..	..	..	..	..	..
1748	Chile	CHL	Internet hosts (per 10,000 people)	IT.NET.HOST.P4	2016-07-01	201607	..	..	..	..	..	..
1749	Chile	CHL	Internet users (per 1,000 people)	IT.NET.USER.P3	2016-07-01	201607	..	..	..	..	..	..
1750	Chile	CHL	Schools connected to the Internet (%)	IT.NET.EDUC.ZS	2016-07-01	201607	..	..	..	..	..	..
1751	Chile	CHL	Secure Internet servers (per 1 million people)	IT.NET.SECR.P6	2016-07-01	201607	53.1294	67.7274	82.5261	93.822	127.627	145.14
1752	Chile	CHL	Information and communication technology expenditure per capita (current US$)	IE.ICT.PCAP.CD	2016-07-01	201607	..	..	..	..	..	..
1753	Chile	CHL	Researchers in R&D (per million people)	SP.POP.SCIE.RD.P6	2016-07-01	201607	319.717	353.369	390.95	..	..	..
1754	Chile	CHL	Scientists and engineers in research and dev. (per million people)	SP.POP.SCIE.RD	2016-07-01	201607	..	..	..	..	..	..
1755	Chile	CHL	Pupil-teacher ratio, tertiary	SE.TER.ENRL.TC.ZS	2016-07-01	201607	14.1154	15.1111	15.3444	14.98	..	..
1756	Central African Republic	CAF	Technicians in R&D (per million people)	SP.POP.TECH.RD.P6	2016-07-01	201607	..	..	..	..	..	..
1757	Central African Republic	CAF	Technicians in research and development (per million people)	SP.POP.TECH.RD	2016-07-01	201607	..	..	..	..	..	..
1758	Central African Republic	CAF	Fixed broadband Internet subscribers (per 100 people)	IT.NET.BBND.P2	2016-07-01	201607	..	0.0182588	0.0133695	..	..	..
1759	Central African Republic	CAF	International Internet bandwidth (bits per second per Internet user)	IT.NET.BNDW.PC	2016-07-01	201607	..	..	..	..	..	..
1760	Central African Republic	CAF	International Internet bandwidth (Mbps)	IT.NET.BNDW	2016-07-01	201607	..	..	..	..	..	..
1761	Central African Republic	CAF	Internet hosts (per 10,000 people)	IT.NET.HOST.P4	2016-07-01	201607	..	..	..	..	..	..
1762	Central African Republic	CAF	Internet users (per 1,000 people)	IT.NET.USER.P3	2016-07-01	201607	..	..	..	..	..	..
1763	Central African Republic	CAF	Schools connected to the Internet (%)	IT.NET.EDUC.ZS	2016-07-01	201607	..	..	..	..	..	..
1764	Central African Republic	CAF	Secure Internet servers (per 1 million people)	IT.NET.SECR.P6	2016-07-01	201607	..	..	0.216474	0.212284	0.208146	..
1765	Central African Republic	CAF	Information and communication technology expenditure per capita (current US$)	IE.ICT.PCAP.CD	2016-07-01	201607	..	..	..	..	..	..
1766	Central African Republic	CAF	Researchers in R&D (per million people)	SP.POP.SCIE.RD.P6	2016-07-01	201607	..	..	..	..	..	..
1767	Central African Republic	CAF	Scientists and engineers in research and dev. (per million people)	SP.POP.SCIE.RD	2016-07-01	201607	..	..	..	..	..	..
1768	Central African Republic	CAF	Pupil-teacher ratio, tertiary	SE.TER.ENRL.TC.ZS	2016-07-01	201607	..	34.6068	..	..	..	..
1769	Cambodia	KHM	Technicians in R&D (per million people)	SP.POP.TECH.RD.P6	2016-07-01	201607	..	..	..	..	..	..
1770	Cambodia	KHM	Technicians in research and development (per million people)	SP.POP.TECH.RD	2016-07-01	201607	..	..	..	..	..	..
1771	Cambodia	KHM	Fixed broadband Internet subscribers (per 100 people)	IT.NET.BBND.P2	2016-07-01	201607	0.248285	0.150624	0.200032	0.21571	0.429062	..
1772	Cambodia	KHM	International Internet bandwidth (bits per second per Internet user)	IT.NET.BNDW.PC	2016-07-01	201607	..	..	..	..	..	..
1773	Cambodia	KHM	International Internet bandwidth (Mbps)	IT.NET.BNDW	2016-07-01	201607	..	..	..	..	..	..
1774	Cambodia	KHM	Internet hosts (per 10,000 people)	IT.NET.HOST.P4	2016-07-01	201607	..	..	..	..	..	..
1775	Cambodia	KHM	Internet users (per 1,000 people)	IT.NET.USER.P3	2016-07-01	201607	..	..	..	..	..	..
1776	Cambodia	KHM	Schools connected to the Internet (%)	IT.NET.EDUC.ZS	2016-07-01	201607	..	..	..	..	..	..
1777	Cambodia	KHM	Secure Internet servers (per 1 million people)	IT.NET.SECR.P6	2016-07-01	201607	1.67089	2.46692	2.96651	2.0559	3.00102	5.13548
1778	Cambodia	KHM	Information and communication technology expenditure per capita (current US$)	IE.ICT.PCAP.CD	2016-07-01	201607	..	..	..	..	..	..
1779	Cambodia	KHM	Researchers in R&D (per million people)	SP.POP.SCIE.RD.P6	2016-07-01	201607	..	..	..	..	..	..
1780	Cambodia	KHM	Scientists and engineers in research and dev. (per million people)	SP.POP.SCIE.RD	2016-07-01	201607	..	..	..	..	..	..
1781	Cambodia	KHM	Pupil-teacher ratio, tertiary	SE.TER.ENRL.TC.ZS	2016-07-01	201607	..	20.7494	..	..	..	..
1782	Burkina Faso	BFA	Technicians in R&D (per million people)	SP.POP.TECH.RD.P6	2016-07-01	201607	37.0664	..	..	..	..	..
1783	Burkina Faso	BFA	Technicians in research and development (per million people)	SP.POP.TECH.RD	2016-07-01	201607	..	..	..	..	..	..
1784	Burkina Faso	BFA	Fixed broadband Internet subscribers (per 100 people)	IT.NET.BBND.P2	2016-07-01	201607	0.0881902	0.0879195	0.0870466	0.0765404	0.0308905	..
1785	Burkina Faso	BFA	International Internet bandwidth (bits per second per Internet user)	IT.NET.BNDW.PC	2016-07-01	201607	..	..	..	..	..	..
1786	Burkina Faso	BFA	International Internet bandwidth (Mbps)	IT.NET.BNDW	2016-07-01	201607	..	..	..	..	..	..
1787	Burkina Faso	BFA	Internet hosts (per 10,000 people)	IT.NET.HOST.P4	2016-07-01	201607	..	..	..	..	..	..
1788	Burkina Faso	BFA	Internet users (per 1,000 people)	IT.NET.USER.P3	2016-07-01	201607	..	..	..	..	..	..
1789	Burkina Faso	BFA	Schools connected to the Internet (%)	IT.NET.EDUC.ZS	2016-07-01	201607	..	..	..	..	..	..
1790	Burkina Faso	BFA	Secure Internet servers (per 1 million people)	IT.NET.SECR.P6	2016-07-01	201607	0.255884	0.620854	0.602743	0.819454	0.625384	0.662779
1791	Burkina Faso	BFA	Information and communication technology expenditure per capita (current US$)	IE.ICT.PCAP.CD	2016-07-01	201607	..	..	..	..	..	..
1792	Burkina Faso	BFA	Researchers in R&D (per million people)	SP.POP.SCIE.RD.P6	2016-07-01	201607	47.495	..	..	..	..	..
1793	Burkina Faso	BFA	Scientists and engineers in research and dev. (per million people)	SP.POP.SCIE.RD	2016-07-01	201607	..	..	..	..	..	..
1794	Burkina Faso	BFA	Pupil-teacher ratio, tertiary	SE.TER.ENRL.TC.ZS	2016-07-01	201607	17.7106	17.275	18.7671	19.6186	..	..
1795	Brunei	BRN	Technicians in R&D (per million people)	SP.POP.TECH.RD.P6	2016-07-01	201607	..	..	..	..	..	..
1796	Brunei	BRN	Technicians in research and development (per million people)	SP.POP.TECH.RD	2016-07-01	201607	..	..	..	..	..	..
1797	Brunei	BRN	Fixed broadband Internet subscribers (per 100 people)	IT.NET.BBND.P2	2016-07-01	201607	5.41704	5.7034	4.81494	6.59599	7.14996	..
1798	Brunei	BRN	International Internet bandwidth (bits per second per Internet user)	IT.NET.BNDW.PC	2016-07-01	201607	..	..	..	..	..	..
1799	Brunei	BRN	International Internet bandwidth (Mbps)	IT.NET.BNDW	2016-07-01	201607	..	..	..	..	..	..
1800	Brunei	BRN	Internet hosts (per 10,000 people)	IT.NET.HOST.P4	2016-07-01	201607	..	..	..	..	..	..
1801	Brunei	BRN	Internet users (per 1,000 people)	IT.NET.USER.P3	2016-07-01	201607	..	..	..	..	..	..
1802	Brunei	BRN	Schools connected to the Internet (%)	IT.NET.EDUC.ZS	2016-07-01	201607	..	..	..	..	..	..
1803	Brunei	BRN	Secure Internet servers (per 1 million people)	IT.NET.SECR.P6	2016-07-01	201607	66.107	115.16	113.437	119.077	150.937	203.219
1804	Brunei	BRN	Information and communication technology expenditure per capita (current US$)	IE.ICT.PCAP.CD	2016-07-01	201607	..	..	..	..	..	..
1805	Brunei	BRN	Researchers in R&D (per million people)	SP.POP.SCIE.RD.P6	2016-07-01	201607	..	..	..	..	..	..
1806	Brunei	BRN	Scientists and engineers in research and dev. (per million people)	SP.POP.SCIE.RD	2016-07-01	201607	..	..	..	..	..	..
1807	Brunei	BRN	Pupil-teacher ratio, tertiary	SE.TER.ENRL.TC.ZS	2016-07-01	201607	8.34682	9.61684	11.7574	13.1889	15.1165	..
1808	Brazil	BRA	Technicians in R&D (per million people)	SP.POP.TECH.RD.P6	2016-07-01	201607	644.747	..	..	..	..	..
1809	Brazil	BRA	Technicians in research and development (per million people)	SP.POP.TECH.RD	2016-07-01	201607	..	..	..	..	..	..
1810	Brazil	BRA	Fixed broadband Internet subscribers (per 100 people)	IT.NET.BBND.P2	2016-07-01	201607	7.22344	9.05529	9.6245	10.661	11.6757	..
1811	Brazil	BRA	International Internet bandwidth (bits per second per Internet user)	IT.NET.BNDW.PC	2016-07-01	201607	..	..	..	..	..	..
1812	Brazil	BRA	International Internet bandwidth (Mbps)	IT.NET.BNDW	2016-07-01	201607	..	..	..	..	..	..
1813	Brazil	BRA	Internet hosts (per 10,000 people)	IT.NET.HOST.P4	2016-07-01	201607	..	..	..	..	..	..
1814	Brazil	BRA	Internet users (per 1,000 people)	IT.NET.USER.P3	2016-07-01	201607	..	..	..	..	..	..
1815	Brazil	BRA	Schools connected to the Internet (%)	IT.NET.EDUC.ZS	2016-07-01	201607	..	..	..	..	..	..
1816	Brazil	BRA	Secure Internet servers (per 1 million people)	IT.NET.SECR.P6	2016-07-01	201607	39.982	53.1524	53.2802	56.3499	68.6342	77.0565
1817	Brazil	BRA	Information and communication technology expenditure per capita (current US$)	IE.ICT.PCAP.CD	2016-07-01	201607	..	..	..	..	..	..
1818	Brazil	BRA	Researchers in R&D (per million people)	SP.POP.SCIE.RD.P6	2016-07-01	201607	698.102	..	..	..	..	..
1819	Brazil	BRA	Scientists and engineers in research and dev. (per million people)	SP.POP.SCIE.RD	2016-07-01	201607	..	..	..	..	..	..
1820	Brazil	BRA	Pupil-teacher ratio, tertiary	SE.TER.ENRL.TC.ZS	2016-07-01	201607	18.9749	19.3872	19.9635	19.9383	..	..
1821	Bosnia and Herzegovina	BIH	Technicians in R&D (per million people)	SP.POP.TECH.RD.P6	2016-07-01	201607	..	..	37.3522	37.7661	..	..
1822	Bosnia and Herzegovina	BIH	Technicians in research and development (per million people)	SP.POP.TECH.RD	2016-07-01	201607	..	..	..	..	..	..
1823	Bosnia and Herzegovina	BIH	Fixed broadband Internet subscribers (per 100 people)	IT.NET.BBND.P2	2016-07-01	201607	10.164	11.2063	12.2433	13.4777	14.1815	..
1824	Bosnia and Herzegovina	BIH	International Internet bandwidth (bits per second per Internet user)	IT.NET.BNDW.PC	2016-07-01	201607	..	..	..	..	..	..
1825	Bosnia and Herzegovina	BIH	International Internet bandwidth (Mbps)	IT.NET.BNDW	2016-07-01	201607	..	..	..	..	..	..
1826	Bosnia and Herzegovina	BIH	Internet hosts (per 10,000 people)	IT.NET.HOST.P4	2016-07-01	201607	..	..	..	..	..	..
1827	Bosnia and Herzegovina	BIH	Internet users (per 1,000 people)	IT.NET.USER.P3	2016-07-01	201607	..	..	..	..	..	..
1828	Bosnia and Herzegovina	BIH	Schools connected to the Internet (%)	IT.NET.EDUC.ZS	2016-07-01	201607	..	..	..	..	..	..
1829	Bosnia and Herzegovina	BIH	Secure Internet servers (per 1 million people)	IT.NET.SECR.P6	2016-07-01	201607	15.6443	19.8314	25.8592	24.0615	35.8869	42.7775
1830	Bosnia and Herzegovina	BIH	Information and communication technology expenditure per capita (current US$)	IE.ICT.PCAP.CD	2016-07-01	201607	..	..	..	..	..	..
1831	Bosnia and Herzegovina	BIH	Researchers in R&D (per million people)	SP.POP.SCIE.RD.P6	2016-07-01	201607	..	..	150.793	216.684	..	..
1832	Bosnia and Herzegovina	BIH	Scientists and engineers in research and dev. (per million people)	SP.POP.SCIE.RD	2016-07-01	201607	..	..	..	..	..	..
1833	Bosnia and Herzegovina	BIH	Pupil-teacher ratio, tertiary	SE.TER.ENRL.TC.ZS	2016-07-01	201607	12.4231	12.4421	11.6092	12.3148	11.8337	..
1834	Benin	BEN	Technicians in R&D (per million people)	SP.POP.TECH.RD.P6	2016-07-01	201607	..	..	..	..	..	..
1835	Benin	BEN	Technicians in research and development (per million people)	SP.POP.TECH.RD	2016-07-01	201607	..	..	..	..	..	..
1836	Benin	BEN	Fixed broadband Internet subscribers (per 100 people)	IT.NET.BBND.P2	2016-07-01	201607	0.284275	0.383802	0.415503	0.41146	0.400669	..
1837	Benin	BEN	International Internet bandwidth (bits per second per Internet user)	IT.NET.BNDW.PC	2016-07-01	201607	..	..	..	..	..	..
1838	Benin	BEN	International Internet bandwidth (Mbps)	IT.NET.BNDW	2016-07-01	201607	..	..	..	..	..	..
1839	Benin	BEN	Internet hosts (per 10,000 people)	IT.NET.HOST.P4	2016-07-01	201607	..	..	..	..	..	..
1840	Benin	BEN	Internet users (per 1,000 people)	IT.NET.USER.P3	2016-07-01	201607	..	..	..	..	..	..
1841	Benin	BEN	Schools connected to the Internet (%)	IT.NET.EDUC.ZS	2016-07-01	201607	..	..	..	..	..	..
1842	Benin	BEN	Secure Internet servers (per 1 million people)	IT.NET.SECR.P6	2016-07-01	201607	0.105155	0.715791	0.696532	1.06566	2.17012	3.86035
1843	Benin	BEN	Information and communication technology expenditure per capita (current US$)	IE.ICT.PCAP.CD	2016-07-01	201607	..	..	..	..	..	..
1844	Benin	BEN	Researchers in R&D (per million people)	SP.POP.SCIE.RD.P6	2016-07-01	201607	..	..	..	..	..	..
1845	Benin	BEN	Scientists and engineers in research and dev. (per million people)	SP.POP.SCIE.RD	2016-07-01	201607	..	..	..	..	..	..
1846	Benin	BEN	Pupil-teacher ratio, tertiary	SE.TER.ENRL.TC.ZS	2016-07-01	201607	17.7612	17.2562	..	..	..	..
1847	Bhutan	BTN	Technicians in R&D (per million people)	SP.POP.TECH.RD.P6	2016-07-01	201607	..	..	..	..	..	..
1848	Bhutan	BTN	Technicians in research and development (per million people)	SP.POP.TECH.RD	2016-07-01	201607	..	..	..	..	..	..
1849	Bhutan	BTN	Fixed broadband Internet subscribers (per 100 people)	IT.NET.BBND.P2	2016-07-01	201607	1.21001	1.81416	2.26011	2.7165	3.26287	..
1850	Bhutan	BTN	International Internet bandwidth (bits per second per Internet user)	IT.NET.BNDW.PC	2016-07-01	201607	..	..	..	..	..	..
1851	Bhutan	BTN	International Internet bandwidth (Mbps)	IT.NET.BNDW	2016-07-01	201607	..	..	..	..	..	..
1852	Bhutan	BTN	Internet hosts (per 10,000 people)	IT.NET.HOST.P4	2016-07-01	201607	..	..	..	..	..	..
1853	Bhutan	BTN	Internet users (per 1,000 people)	IT.NET.USER.P3	2016-07-01	201607	..	..	..	..	..	..
1854	Bhutan	BTN	Schools connected to the Internet (%)	IT.NET.EDUC.ZS	2016-07-01	201607	..	..	..	..	..	..
1855	Bhutan	BTN	Secure Internet servers (per 1 million people)	IT.NET.SECR.P6	2016-07-01	201607	4.16524	5.46265	12.1015	9.27598	14.3789	16.7779
1856	Bhutan	BTN	Information and communication technology expenditure per capita (current US$)	IE.ICT.PCAP.CD	2016-07-01	201607	..	..	..	..	..	..
1857	Bhutan	BTN	Researchers in R&D (per million people)	SP.POP.SCIE.RD.P6	2016-07-01	201607	..	..	..	..	..	..
1858	Bhutan	BTN	Scientists and engineers in research and dev. (per million people)	SP.POP.SCIE.RD	2016-07-01	201607	..	..	..	..	..	..
1859	Bhutan	BTN	Pupil-teacher ratio, tertiary	SE.TER.ENRL.TC.ZS	2016-07-01	201607	6.74724	7.23945	7.74869	..	..	..
1860	Belgium	BEL	Technicians in R&D (per million people)	SP.POP.TECH.RD.P6	2016-07-01	201607	1317.54	1378.98	..	..	..	..
1861	Belgium	BEL	Technicians in research and development (per million people)	SP.POP.TECH.RD	2016-07-01	201607	..	..	..	..	..	..
1862	Belgium	BEL	Fixed broadband Internet subscribers (per 100 people)	IT.NET.BBND.P2	2016-07-01	201607	30.8295	32.1966	33.3813	34.4809	35.9929	..
1863	Belgium	BEL	International Internet bandwidth (bits per second per Internet user)	IT.NET.BNDW.PC	2016-07-01	201607	..	..	..	..	..	..
1864	Belgium	BEL	International Internet bandwidth (Mbps)	IT.NET.BNDW	2016-07-01	201607	..	..	..	..	..	..
1865	Belgium	BEL	Internet hosts (per 10,000 people)	IT.NET.HOST.P4	2016-07-01	201607	..	..	..	..	..	..
1866	Belgium	BEL	Internet users (per 1,000 people)	IT.NET.USER.P3	2016-07-01	201607	..	..	..	..	..	..
1867	Belgium	BEL	Schools connected to the Internet (%)	IT.NET.EDUC.ZS	2016-07-01	201607	..	..	..	..	..	..
1868	Belgium	BEL	Secure Internet servers (per 1 million people)	IT.NET.SECR.P6	2016-07-01	201607	489.097	597.407	674.41	738.276	853.781	976.898
1869	Belgium	BEL	Information and communication technology expenditure per capita (current US$)	IE.ICT.PCAP.CD	2016-07-01	201607	..	..	..	..	..	..
1870	Belgium	BEL	Researchers in R&D (per million people)	SP.POP.SCIE.RD.P6	2016-07-01	201607	3735.82	3878.7	3954.4	4003.28	..	..
1871	Belgium	BEL	Scientists and engineers in research and dev. (per million people)	SP.POP.SCIE.RD	2016-07-01	201607	..	..	..	..	..	..
1872	Belgium	BEL	Pupil-teacher ratio, tertiary	SE.TER.ENRL.TC.ZS	2016-07-01	201607	15.3783	16.2577	16.5533	16.3401	..	..
1873	Azerbaijan	AZE	Technicians in R&D (per million people)	SP.POP.TECH.RD.P6	2016-07-01	201607	..	..	..	..	..	..
1874	Azerbaijan	AZE	Technicians in research and development (per million people)	SP.POP.TECH.RD	2016-07-01	201607	..	..	..	..	..	..
1875	Azerbaijan	AZE	Fixed broadband Internet subscribers (per 100 people)	IT.NET.BBND.P2	2016-07-01	201607	5.22606	10.5827	14.7126	18.1887	19.9484	..
1876	Azerbaijan	AZE	International Internet bandwidth (bits per second per Internet user)	IT.NET.BNDW.PC	2016-07-01	201607	..	..	..	..	..	..
1877	Azerbaijan	AZE	International Internet bandwidth (Mbps)	IT.NET.BNDW	2016-07-01	201607	..	..	..	..	..	..
1878	Azerbaijan	AZE	Internet hosts (per 10,000 people)	IT.NET.HOST.P4	2016-07-01	201607	..	..	..	..	..	..
1879	Azerbaijan	AZE	Internet users (per 1,000 people)	IT.NET.USER.P3	2016-07-01	201607	..	..	..	..	..	..
1880	Azerbaijan	AZE	Schools connected to the Internet (%)	IT.NET.EDUC.ZS	2016-07-01	201607	..	..	..	..	..	..
1881	Azerbaijan	AZE	Secure Internet servers (per 1 million people)	IT.NET.SECR.P6	2016-07-01	201607	5.08044	4.68763	6.45454	8.49545	13.529	16.3708
1882	Azerbaijan	AZE	Information and communication technology expenditure per capita (current US$)	IE.ICT.PCAP.CD	2016-07-01	201607	..	..	..	..	..	..
1883	Azerbaijan	AZE	Researchers in R&D (per million people)	SP.POP.SCIE.RD.P6	2016-07-01	201607	..	..	..	..	..	..
1884	Azerbaijan	AZE	Scientists and engineers in research and dev. (per million people)	SP.POP.SCIE.RD	2016-07-01	201607	..	..	..	..	..	..
1885	Azerbaijan	AZE	Pupil-teacher ratio, tertiary	SE.TER.ENRL.TC.ZS	2016-07-01	201607	7.00329	7.08139	7.42693	7.35359	9.16601	..
1886	Australia	AUS	Technicians in R&D (per million people)	SP.POP.TECH.RD.P6	2016-07-01	201607	..	..	..	..	..	..
1887	Australia	AUS	Technicians in research and development (per million people)	SP.POP.TECH.RD	2016-07-01	201607	..	..	..	..	..	..
1888	Australia	AUS	Fixed broadband Internet subscribers (per 100 people)	IT.NET.BBND.P2	2016-07-01	201607	24.5933	24.4146	24.8802	25.6227	27.6596	..
1889	Australia	AUS	International Internet bandwidth (bits per second per Internet user)	IT.NET.BNDW.PC	2016-07-01	201607	..	..	..	..	..	..
1890	Australia	AUS	International Internet bandwidth (Mbps)	IT.NET.BNDW	2016-07-01	201607	..	..	..	..	..	..
1891	Australia	AUS	Internet hosts (per 10,000 people)	IT.NET.HOST.P4	2016-07-01	201607	..	..	..	..	..	..
1892	Australia	AUS	Internet users (per 1,000 people)	IT.NET.USER.P3	2016-07-01	201607	..	..	..	..	..	..
1893	Australia	AUS	Schools connected to the Internet (%)	IT.NET.EDUC.ZS	2016-07-01	201607	..	..	..	..	..	..
1894	Australia	AUS	Secure Internet servers (per 1 million people)	IT.NET.SECR.P6	2016-07-01	201607	1784.56	2027.8	1721.07	1253	1350.11	1460.95
1895	Australia	AUS	Information and communication technology expenditure per capita (current US$)	IE.ICT.PCAP.CD	2016-07-01	201607	..	..	..	..	..	..
1896	Australia	AUS	Researchers in R&D (per million people)	SP.POP.SCIE.RD.P6	2016-07-01	201607	..	..	..	..	..	..
1897	Australia	AUS	Scientists and engineers in research and dev. (per million people)	SP.POP.SCIE.RD	2016-07-01	201607	..	..	..	..	..	..
1898	Australia	AUS	Pupil-teacher ratio, tertiary	SE.TER.ENRL.TC.ZS	2016-07-01	201607	..	..	..	27.4725	..	..
1899	Armenia	ARM	Technicians in R&D (per million people)	SP.POP.TECH.RD.P6	2016-07-01	201607	..	..	..	..	..	..
1900	Armenia	ARM	Technicians in research and development (per million people)	SP.POP.TECH.RD	2016-07-01	201607	..	..	..	..	..	..
1901	Armenia	ARM	Fixed broadband Internet subscribers (per 100 people)	IT.NET.BBND.P2	2016-07-01	201607	3.15796	5.41722	7.14204	8.16572	9.14497	..
1902	Armenia	ARM	International Internet bandwidth (bits per second per Internet user)	IT.NET.BNDW.PC	2016-07-01	201607	..	..	..	..	..	..
1903	Armenia	ARM	International Internet bandwidth (Mbps)	IT.NET.BNDW	2016-07-01	201607	..	..	..	..	..	..
1904	Armenia	ARM	Internet hosts (per 10,000 people)	IT.NET.HOST.P4	2016-07-01	201607	..	..	..	..	..	..
1905	Armenia	ARM	Internet users (per 1,000 people)	IT.NET.USER.P3	2016-07-01	201607	..	..	..	..	..	..
1906	Armenia	ARM	Schools connected to the Internet (%)	IT.NET.EDUC.ZS	2016-07-01	201607	..	..	..	..	..	..
1907	Armenia	ARM	Secure Internet servers (per 1 million people)	IT.NET.SECR.P6	2016-07-01	201607	18.2217	28.9759	26.8606	40.1044	40.9161	49.0438
1908	Armenia	ARM	Information and communication technology expenditure per capita (current US$)	IE.ICT.PCAP.CD	2016-07-01	201607	..	..	..	..	..	..
1909	Armenia	ARM	Researchers in R&D (per million people)	SP.POP.SCIE.RD.P6	2016-07-01	201607	..	..	..	..	..	..
1910	Armenia	ARM	Scientists and engineers in research and dev. (per million people)	SP.POP.SCIE.RD	2016-07-01	201607	..	..	..	..	..	..
1911	Armenia	ARM	Pupil-teacher ratio, tertiary	SE.TER.ENRL.TC.ZS	2016-07-01	201607	9.22332	8.6038	7.37891	7.44905	7.10141	..
1912	Angola	AGO	Technicians in R&D (per million people)	SP.POP.TECH.RD.P6	2016-07-01	201607	..	39.1026	..	..	..	..
1913	Angola	AGO	Technicians in research and development (per million people)	SP.POP.TECH.RD	2016-07-01	201607	..	..	..	..	..	..
1914	Angola	AGO	Fixed broadband Internet subscribers (per 100 people)	IT.NET.BBND.P2	2016-07-01	201607	0.102306	0.114472	0.170303	0.350975	0.412784	..
1915	Angola	AGO	International Internet bandwidth (bits per second per Internet user)	IT.NET.BNDW.PC	2016-07-01	201607	..	..	..	..	..	..
1916	Angola	AGO	International Internet bandwidth (Mbps)	IT.NET.BNDW	2016-07-01	201607	..	..	..	..	..	..
1917	Angola	AGO	Internet hosts (per 10,000 people)	IT.NET.HOST.P4	2016-07-01	201607	..	..	..	..	..	..
1918	Angola	AGO	Internet users (per 1,000 people)	IT.NET.USER.P3	2016-07-01	201607	..	..	..	..	..	..
1919	Angola	AGO	Schools connected to the Internet (%)	IT.NET.EDUC.ZS	2016-07-01	201607	..	..	..	..	..	..
1920	Angola	AGO	Secure Internet servers (per 1 million people)	IT.NET.SECR.P6	2016-07-01	201607	2.45052	2.82559	3.17382	3.53972	4.54029	5.47519
1921	Angola	AGO	Information and communication technology expenditure per capita (current US$)	IE.ICT.PCAP.CD	2016-07-01	201607	..	..	..	..	..	..
1922	Angola	AGO	Researchers in R&D (per million people)	SP.POP.SCIE.RD.P6	2016-07-01	201607	..	52.4102	..	..	..	..
1923	Angola	AGO	Scientists and engineers in research and dev. (per million people)	SP.POP.SCIE.RD	2016-07-01	201607	..	..	..	..	..	..
1924	Angola	AGO	Pupil-teacher ratio, tertiary	SE.TER.ENRL.TC.ZS	2016-07-01	201607	..	18.1608	..	..	..	..
1925	Albania	ALB	Technicians in R&D (per million people)	SP.POP.TECH.RD.P6	2016-07-01	201607	..	..	..	..	..	..
1926	Albania	ALB	Technicians in research and development (per million people)	SP.POP.TECH.RD	2016-07-01	201607	..	..	..	..	..	..
1927	Albania	ALB	Fixed broadband Internet subscribers (per 100 people)	IT.NET.BBND.P2	2016-07-01	201607	3.35029	4.06515	5.06274	5.75293	6.57372	..
1928	Albania	ALB	International Internet bandwidth (bits per second per Internet user)	IT.NET.BNDW.PC	2016-07-01	201607	..	..	..	..	..	..
1929	Albania	ALB	International Internet bandwidth (Mbps)	IT.NET.BNDW	2016-07-01	201607	..	..	..	..	..	..
1930	Albania	ALB	Internet hosts (per 10,000 people)	IT.NET.HOST.P4	2016-07-01	201607	..	..	..	..	..	..
1931	Albania	ALB	Internet users (per 1,000 people)	IT.NET.USER.P3	2016-07-01	201607	..	..	..	..	..	..
1932	Albania	ALB	Schools connected to the Internet (%)	IT.NET.EDUC.ZS	2016-07-01	201607	..	..	..	..	..	..
1933	Albania	ALB	Secure Internet servers (per 1 million people)	IT.NET.SECR.P6	2016-07-01	201607	9.26873	15.1474	20.6879	17.6065	23.8453	37.7271
1934	Albania	ALB	Information and communication technology expenditure per capita (current US$)	IE.ICT.PCAP.CD	2016-07-01	201607	..	..	..	..	..	..
1935	Albania	ALB	Researchers in R&D (per million people)	SP.POP.SCIE.RD.P6	2016-07-01	201607	..	..	..	..	..	..
1936	Albania	ALB	Scientists and engineers in research and dev. (per million people)	SP.POP.SCIE.RD	2016-07-01	201607	..	..	..	..	..	..
1937	Albania	ALB	Pupil-teacher ratio, tertiary	SE.TER.ENRL.TC.ZS	2016-07-01	201607	..	13.7911	..	24.3428	23.5943	..
	Data from database: WDI Database Archives (beta)
	Last Updated: 07/22/2016

## Sheet: Definition and Source
Code	Indicator Name	Source	Long definition
SP.POP.TECH.RD.P6	Technicians in R&D (per million people)	United Nations Educational, Scientific, and Cultural Organization (UNESCO) Institute for Statistics.	Technicians in R&D and equivalent staff are people whose main tasks require technical knowledge and experience in engineering, physical and life sciences (technicians), or social sciences and humanities (equivalent staff). They participate in R&D by performing scientific and technical tasks involving the application of concepts and operational methods, normally under the supervision of researcher…
IT.NET.BBND.P2	Fixed broadband subscriptions (per 100 people)	International Telecommunication Union, World Telecommunication/ICT Development Report and database.	Fixed broadband subscriptions refers to fixed subscriptions to high-speed access to the public Internet (a TCP/IP connection), at downstream speeds equal to, or greater than, 256 kbit/s. This includes cable modem, DSL, fiber-to-the-home/building, other fixed (wired)-broadband subscriptions, satellite broadband and terrestrial fixed wireless broadband. This total is measured irrespective of the me…
IT.NET.BNDW.PC	International Internet bandwidth (bits per second per Internet user)	International Telecommunication Union, World Telecommunication/ICT Development Report and database.	International Internet bandwidth refers to the total used capacity of international Internet bandwidth, in bits per second per Internet user. Used international Internet bandwidth refers to the average traffic load (expressed in Mbit/s) of international fiber-optic cables and radio links for carrying Internet traffic. The average should be calculated over the 12-month period of the reference year…
IT.NET.BNDW	International Internet bandwidth (Mbps)	International Telecommunication Union, World Telecommunication/ICT Development Report and database, and TeleGeography.	International Internet bandwidth refers to the total used capacity of international Internet bandwidth. Used international Internet bandwidth refers to the average traffic load of international fiber-optic cables and radio links for carrying Internet traffic. The average should be calculated over the 12-month period of the reference year, and should take into consideration the traffic of all inte…
IT.NET.EDUC.ZS	Schools connected to the Internet (%)	World Bank estimates.	Schools connected to the Internet are the share of primary and secondary schools in the country that have access to the Internet.
IT.NET.SECR.P6	Secure Internet servers (per 1 million people)	Netcraft (http://www.netcraft.com/) and World Bank population estimates.	Secure servers are servers using encryption technology in Internet transactions.
IE.ICT.PCAP.CD	Information and communication technology expenditure per capita (current US$)	World Information Technology and Services Alliance, Digital Planet: The Global Information Economy, and Global Insight, Inc.	Information and communications technology expenditures include computer hardware (computers, storage devices, printers, and other peripherals); computer software (operating systems, programming tools, utilities, applications, and internal software development); computer services (information technology consulting, computer and network systems integration, Web hosting, data processing services, an…
SP.POP.SCIE.RD.P6	Researchers in R&D (per million people)	United Nations Educational, Scientific, and Cultural Organization (UNESCO) Institute for Statistics.	Researchers in R&D are professionals engaged in the conception or creation of new knowledge, products, processes, methods, or systems and in the management of the projects concerned. Postgraduate PhD students (ISCED97 level 6) engaged in R&D are included.
SE.TER.ENRL.TC.ZS	Pupil-teacher ratio, tertiary	United Nations Educational, Scientific, and Cultural Organization (UNESCO) Institute for Statistics.	Tertiary school pupil-teacher ratio is the average number of pupils per teacher in tertiary school.
